# Supplementary material for: Physiological Investigation and Transcriptome Analysis of Polyethylene Glycol (PEG)-Induced Dehydration Stress in Cassava
Source: Int J Mol Sci. 2016 Feb 25;17(3):283. doi: 10.3390/ijms17030283 (PMC4813147; doi:10.3390/ijms17030283)
Supplement: Supplementary file 1 [file ijms-17-00283-s001.xlsx]

## Sheet: Figures S1
Figure S1. Performance of cassava plants under various PEG concentrations along eight time points.

## Sheet: Figure S2
Figure S2. Clustering of 92 abiotic stress genes.

## Sheet: Figure S3
Figure S3. Clustering of 170 TFs across leaf and root samples.

## Sheet: Table S1A
Table S1A. The primers used in this study
GeneID	Forward (5'-3')	Reverse (5'-3')
cassava4.1_034379m.g	TGGGATGGTTCATGCTGTCC	TATCCCAGAGTGGCCATGGA
cassava4.1_012593m.g	TCCTTTTGCCATGCCAATGC	CAAGCGCCTCTCGTGTAGAA
cassava4.1_032017m.g	TTGAGCCACACCACCAGTTT	AGGTGAGCTTGGCAGTGAAA
cassava4.1_010216m.g	CCTGCAAACAAGCTGTCGTC	AGCACCATTGGCTCTCCTTC
cassava4.1_010999m.g	GCCCGAGATTGATGACCGAT	TGGAACCGAGTTAAACCCGG
cassava4.1_023969m.g	CCTCAGCCTTCAGGTTCCAG	AACTCTTCTGCAGGTGGTCG
cassava4.1_010869m.g	CACAGGACACAGGCCTCAAT	TCAAAGTCTGCAGGTCCAGC
cassava4.1_002371m.g	GCTTATGCTGGTGTCCCTGT	CACGCGCACCAAAGTGTTTA
cassava4.1_001092m.g	TACTGCTCGTGCCAGTGAAG	CCAACGCCACTTTCACCAAG
cassava4.1_010991m.g	ACAACGCAGCCTCTTGAAGA	GAGTTCAGGCCCCGAATTCA
cassava4.1_029889m.g	GCATGTGTGGGAGGGAAAGA	TCCCCGTTGCCTTCCAATAC
cassava4.1_010191m.g	ACGCCCACTTCCTACCATTG	GCTGGTGTTCAAGAATGGCG
cassava4.1_014491m.g	TGTGCAAGCTGAGGAACACA	CTGAAGATGCGCAGGAAGGA
cassava4.1_012777m.g	ATCACCAGCTTCTTTCGCCA	GATACAGGTCTCCGACGCTG
cassava4.1_015049m.g	CGGGTGTTGTGTAGCTGTGA	AACTCCCAGTCCATGTGCTG
β-Actin	TGATGAGTCTGGTCCATCCA	CCTCCTACGACCCAATCTCA

## Sheet: Table S1B
Table S1B. The correlation between qRT-PCR and RNA-seq results.
qRT-PCR														RNA-seq
geneid	FL0	FL3	FL24	FEL0	FEL3	FEL24	BL0	BL3	BL24	RT0	RT3	RT24	Correlation	geneid	FL00	FL03	FL24	FEL00	FEL03	FEL24	BL00	BL03	BL24	RT00	RT03	RT24	max_exp	At.homolog	rice.homolog	mapman.description	TAIR10.short_description	TAIR10.ANN
cassava4.1_034379m.g	1.01029	1.90253	1.8355	0.547756	5.24014	0.299852	0.151406	0.107403	0.0687835	2.9972	7.37482	36.2074	0.92562	cassava4.1_034379m.g	0.12014	0.852776	1.11674	1.30576	7.96437	1.62746	0.500676	4.31777	2.40293	5.78249	25.7605	42.8788	42.8788	AT3G14440	loc_os03g44380	NCED3 (NINE-CIS-EPOXYCAROTENOID DIOXYGENASE 3); 9-cis-epoxycarotenoid dioxygenase	nine-cis-epoxycarotenoid dioxygenase 3	nine-cis-epoxycarotenoid dioxygenase 3 (NCED3); CONTAINS InterPro DOMAIN/s: Carotenoid oxygenase (InterPro:IPR004294); BEST Arabidopsis thaliana protein match is: nine-cis-epoxycarotenoid dioxygenase 9 (TAIR:AT1G78390.1); Has 2945 Blast hits to 2901 proteins in 493 species: Archae - 16; Bacteria - 796; Metazoa - 281; Fungi - 204; Plants - 893; Viruses - 0; Other Eukaryotes - 755 (source: NCBI BLi…
cassava4.1_012593m.g	0.0462561	0.401354	0.163773	0.167367	0.00363492	0.00680878	1.34651	1.10544	0.67853	0.0137339	6.98002	12.8325	0.897541	cassava4.1_012593m.g	2.76322	4.87301	4.02025	7.10915	10.3646	10.6411	34.6468	31.8926	26.7599	18.251	51.5209	70.0495	70.0495	AT2G47260	loc_os07g02060	WRKY23; transcription factor	WRKY DNA-binding protein 23	WRKY DNA-binding protein 23 (WRKY23); CONTAINS InterPro DOMAIN/s: DNA-binding WRKY (InterPro:IPR003657), Transcription factor, WRKY group IIc (InterPro:IPR017396); BEST Arabidopsis thaliana protein match is: WRKY family transcription factor (TAIR:AT3G62340.1); Has 3541 Blast hits to 3088 proteins in 202 species: Archae - 0; Bacteria - 3; Metazoa - 11; Fungi - 7; Plants - 3503; Viruses - 0; Other …
cassava4.1_032017m.g	2.25791	1.61293	19.4454	0.702905	0.000789411	0.000265777	0.000411245	0.000309087	18.9452	0.00718635	36.5653	51.298	0.794393	cassava4.1_032017m.g	2.76322	1.9492	3.57356	4.49763	1.96382	5.13277	3.50473	4.21964	57.561	14.9983	31.6767	56.9948	57.561	AT2G30590	loc_os12g40570	WRKY21; calmodulin binding / transcription factor	WRKY DNA-binding protein 21	WRKY DNA-binding protein 21 (WRKY21); FUNCTIONS IN: calmodulin binding, sequence-specific DNA binding transcription factor activity; INVOLVED IN: regulation of transcription, DNA-dependent, regulation of transcription; LOCATED IN: nucleus; EXPRESSED IN: 22 plant structures; EXPRESSED DURING: 13 growth stages; CONTAINS InterPro DOMAIN/s: DNA-binding WRKY (InterPro:IPR003657), Transcription factor,…
cassava4.1_010216m.g	0.336199	2.37995	1.86818	1.44731	0.105712	0.101241	0.0635585	0.0908309	0.337586	0.145415	53.9726	63.6214	0.743645	cassava4.1_010216m.g	16.8196	22.1722	30.4869	14.2183	33.8213	31.1722	20.728	33.2664	25.34	9.21585	43.2628	48.3978	48.3978	AT1G45249	loc_os02g52780	ABF2 (ABSCISIC ACID RESPONSIVE ELEMENTS-BINDING FACTOR 2); DNA binding / protein binding / transcription activator/ transcription factor	abscisic acid responsive elements-binding factor 2	abscisic acid responsive elements-binding factor 2 (ABF2); FUNCTIONS IN: protein binding, DNA binding, transcription activator activity, sequence-specific DNA binding transcription factor activity; INVOLVED IN: in 6 processes; LOCATED IN: nucleus; EXPRESSED IN: hydathode, leaf vascular system, whole plant, root, cultured cell; CONTAINS InterPro DOMAIN/s: Basic-leucine zipper (bZIP) transcription …
cassava4.1_010999m.g	0.649314	5.55781	5.76237	8.22539	3.68575	2.78739	1.2546	1.79044	7.26682	3.90932	97.8201	146.974	0.921518	cassava4.1_010999m.g	5.04587	7.30951	18.0911	5.80339	13.5285	16.7754	8.71176	18.0561	75.1461	10.2097	91.8255	157.611	157.611	AT4G27410	loc_os01g66120	RD26 (RESPONSIVE TO DESICCATION 26); transcription activator/ transcription factor	NAC (No Apical Meristem) domain transcriptional regulator superfamily protein	RESPONSIVE TO DESICCATION 26 (RD26); CONTAINS InterPro DOMAIN/s: No apical meristem (NAM) protein (InterPro:IPR003441); BEST Arabidopsis thaliana protein match is: NAC domain containing protein 19 (TAIR:AT1G52890.1); Has 297 Blast hits to 297 proteins in 44 species: Archae - 0; Bacteria - 0; Metazoa - 0; Fungi - 0; Plants - 297; Viruses - 0; Other Eukaryotes - 0 (source: NCBI BLink).
cassava4.1_023969m.g	0.484399	8.10272	4.33832	7.0449	1.69557	0.990824	1.00995	1.58529	10.9298	1.92521	69.6411	35.3227	0.806808	cassava4.1_023969m.g	0.24028	0.609126	2.34515	2.32136	2.40022	2.87936	2.90392	3.82711	12.0146	11.7457	71.1186	111.124	111.124	AT1G61110	loc_os07g37920	nac025 (Arabidopsis NAC domain containing protein 25); transcription factor	NAC domain containing protein 25	NAC domain containing protein 25 (NAC025); FUNCTIONS IN: sequence-specific DNA binding transcription factor activity; INVOLVED IN: multicellular organismal development, regulation of transcription; LOCATED IN: cellular_component unknown; EXPRESSED IN: 6 plant structures; EXPRESSED DURING: 4 anthesis, petal differentiation and expansion stage; CONTAINS InterPro DOMAIN/s: No apical meristem (NAM) p…
cassava4.1_010869m.g	0.0339935	0.306098	0.165837	0.314815	0.0498841	0.0488396	0.0414253	0.0534547	25.7446	0.0943602	26.6845	68.7291	0.891581	cassava4.1_010869m.g	0.600699	1.9492	1.45176	3.91729	7.52797	3.6305	13.2178	18.6449	74.7092	13.5527	155.919	151.455	155.919	AT5G61430	loc_os04g38720	NAC100 (ARABIDOPSIS NAC DOMAIN CONTAINING PROTEIN 100); transcription factor	NAC domain containing protein 100	NAC domain containing protein 100 (NAC100); FUNCTIONS IN: sequence-specific DNA binding transcription factor activity; INVOLVED IN: multicellular organismal development, regulation of transcription; LOCATED IN: cellular_component unknown; EXPRESSED IN: 9 plant structures; EXPRESSED DURING: LP.04 four leaves visible, 4 anthesis, petal differentiation and expansion stage; CONTAINS InterPro DOMAIN/s…
cassava4.1_002371m.g	0.390926	0.673843	0.630031	1.16348	0.517806	0.688894	0.739412	0.405834	1.63708	0.424996	0.57592	0.549693	0.759144	cassava4.1_002371m.g	19.1022	14.7408	18.5378	9.43051	7.85527	23.5356	7.71041	6.9673	95.1341	19.0642	18.7349	22.1823	95.1341	AT2G39800	loc_os05g38150	P5CS1 (DELTA1-PYRROLINE-5-CARBOXYLATE SYNTHASE 1); delta1-pyrroline-5-carboxylate synthetase	delta1-pyrroline-5-carboxylate synthase 1	delta1-pyrroline-5-carboxylate synthase 1 (P5CS1); FUNCTIONS IN: delta1-pyrroline-5-carboxylate synthetase activity; INVOLVED IN: in 9 processes; LOCATED IN: chloroplast, membrane, cytoplasm; EXPRESSED IN: 6 plant structures; EXPRESSED DURING: C globular stage, D bilateral stage, E expanded cotyledon stage; CONTAINS InterPro DOMAIN/s: Glutamate 5-kinase (InterPro:IPR001057), Aspartate/glutamate/u…
cassava4.1_001092m.g	8.18723	12.8613	14.2401	25.1335	27.7777	16.9383	15.9905	15.774	38.9835	9.01093	9.4986	11.0194	0.750351	cassava4.1_001092m.g	26.9113	44.8317	35.2889	46.8624	54.9869	52.3292	92.4248	121.29	553.438	38.3994	75.5558	61.4525	553.438	AT5G51070	loc_os02g32520	ERD1 (EARLY RESPONSIVE TO DEHYDRATION 1); ATP binding / ATPase/ nucleoside-triphosphatase/ nucleotide binding / protein binding	Clp ATPase	EARLY RESPONSIVE TO DEHYDRATION 1 (ERD1); FUNCTIONS IN: nucleoside-triphosphatase activity, ATPase activity, nucleotide binding, ATP binding; INVOLVED IN: response to water deprivation; LOCATED IN: chloroplast stroma, chloroplast, chloroplast envelope; EXPRESSED IN: 22 plant structures; EXPRESSED DURING: 13 growth stages; CONTAINS InterPro DOMAIN/s: Clp ATPase, C-terminal (InterPro:IPR019489), AT…
cassava4.1_010991m.g	0.824233	0.878864	1.53366	1.43469	3.9616	2.26052	1.96168	2.35482	7.06226	1.15584	2.19309	5.67312	0.933347	cassava4.1_010991m.g	0.480559	3.04563	3.35021	1.01559	11.2374	7.13581	3.90527	11.6776	80.8257	3.61406	12.6953	77.5851	80.8257	AT4G27410	loc_os01g66120	ANAC19 (AT1G52890)	NAC (No Apical Meristem) domain transcriptional regulator superfamily protein	RESPONSIVE TO DESICCATION 26 (RD26); CONTAINS InterPro DOMAIN/s: No apical meristem (NAM) protein (InterPro:IPR003441); BEST Arabidopsis thaliana protein match is: NAC domain containing protein 19 (TAIR:AT1G52890.1); Has 297 Blast hits to 297 proteins in 44 species: Archae - 0; Bacteria - 0; Metazoa - 0; Fungi - 0; Plants - 297; Viruses - 0; Other Eukaryotes - 0 (source: NCBI BLink).
cassava4.1_029889m.g	46.9605	79.2956	70.8903	33.9782	46.4209	37.3226	50.3149	35.5471	221.611	73.1042	92.9573	102.084	0.853101	cassava4.1_029889m.g	0.480559	0.609126	0.335021	3.19186	17.6744	11.0167	9.81325	23.4533	167.222	1.71668	0.369767	9.5522	167.222	AT1G56010	loc_os06g46270	NAC1; transcription factor	NAC domain containing protein 1	NAC domain containing protein 1 (NAC1); CONTAINS InterPro DOMAIN/s: No apical meristem (NAM) protein (InterPro:IPR003441); BEST Arabidopsis thaliana protein match is: NAC (No Apical Meristem) domain transcriptional regulator superfamily protein (TAIR:AT3G12977.1); Has 2736 Blast hits to 2731 proteins in 75 species: Archae - 0; Bacteria - 0; Metazoa - 0; Fungi - 0; Plants - 2736; Viruses - 0; Othe…
cassava4.1_010191m.g	429.027	818.643	423.082	751.368	755.812	727.136	614.762	544.435	1241.54	210.18	332.021	281.671	0.692132	cassava4.1_010191m.g	0.360419	0.852776	2.90352	1.45085	6.00056	7.88694	13.8187	16.6823	241.822	1.44562	10.4767	17.8308	241.822	AT3G04070	loc_os07g37920	anac047 (Arabidopsis NAC domain containing protein 47); transcription factor	NAC domain containing protein 47	NAC domain containing protein 47 (NAC047); FUNCTIONS IN: sequence-specific DNA binding transcription factor activity; INVOLVED IN: multicellular organismal development, regulation of transcription; LOCATED IN: cellular_component unknown; EXPRESSED IN: 16 plant structures; EXPRESSED DURING: 7 growth stages; CONTAINS InterPro DOMAIN/s: No apical meristem (NAM) protein (InterPro:IPR003441); BEST Ara…
cassava4.1_014491m.g	2.5668	1.96492	3.30746	0.794614	2.20455	1.62908	1.85293	2.37137	11.3323	3.15195	4.77573	7.80106	0.813209	cassava4.1_014491m.g	51.7802	34.3547	52.375	65.7234	46.8043	56.8361	28.8389	38.958	143.193	29.9063	47.207	70.1556	143.193	AT5G13180	loc_os07g37920	ANAC083 (ARABIDOPSIS NAC DOMAIN CONTAINING PROTEIN 83); transcription factor	NAC domain containing protein 83	NAC domain containing protein 83 (NAC083); CONTAINS InterPro DOMAIN/s: No apical meristem (NAM) protein (InterPro:IPR003441); BEST Arabidopsis thaliana protein match is: NAC domain containing protein 41 (TAIR:AT2G33480.1); Has 1807 Blast hits to 1807 proteins in 277 species: Archae - 0; Bacteria - 0; Metazoa - 736; Fungi - 347; Plants - 385; Viruses - 0; Other Eukaryotes - 339 (source: NCBI BLink…
cassava4.1_012777m.g	18.4522	27.8728	17.3491	23.8434	20.6423	18.9718	36.5615	18.2414	138.308	18.3501	19.3571	23.4695	0.912742	cassava4.1_012777m.g	11.8938	14.619	36.964	62.2414	72.1158	81.248	87.2178	82.7245	245.645	37.9476	44.8651	65.3795	245.645	AT3G01470	loc_os09g29460	ATHB-1 (ARABIDOPSIS THALIANA HOMEOBOX 1); DNA binding / protein homodimerization/ sequence-specific DNA binding / transcription activator/ transcription factor	homeobox 1	homeobox 1 (HB-1); FUNCTIONS IN: sequence-specific DNA binding, DNA binding, transcription activator activity, protein homodimerization activity, sequence-specific DNA binding transcription factor activity; INVOLVED IN: response to salt stress, response to blue light, positive regulation of transcription, regulation of transcription, DNA-dependent, leaf morphogenesis; LOCATED IN: nucleus; EXPRESS…
cassava4.1_015049m.g	3.35746	3.91407	4.56932	3.38952	10.3065	4.69715	6.15115	7.47832	26.1131	3.72812	11.2064	24.3123	0.866784	cassava4.1_015049m.g	8.52993	15.1063	34.6189	23.2136	59.5691	70.8573	46.0622	82.8226	306.155	4.06581	54.4791	123.117	306.155	AT2G46680	loc_os09g35910	ATHB-7 (ARABIDOPSIS THALIANA HOMEOBOX 7); transcription activator/ transcription factor	homeobox 7	homeobox 7 (HB-7); FUNCTIONS IN: transcription activator activity, sequence-specific DNA binding transcription factor activity; INVOLVED IN: response to water deprivation, abscisic acid mediated signaling pathway, regulation of transcription, DNA-dependent, response to abscisic acid stimulus; LOCATED IN: nucleus; EXPRESSED IN: 21 plant structures; EXPRESSED DURING: 6 growth stages; CONTAINS Inter…
												Mean=	0.837461

## Sheet: Table S2
Table S2. General information of 92 abiotic stress related DE genes.
geneid	FL00	FL03	FL24	FEL00	FEL03	FEL24	BL00	BL03	BL24	RT00	RT03	RT24	geneid	protein_root	protein_leaf	groupinfo	stress_group	protein_root	protein_leaf	mapman.ANN	At.homolog	rice.homolog	mapman.description	TAIR10.short_description	TAIR10.ANN
cassava4.1_005920m.g	0.961118	0.487301	24.6799	0.435254	0.327303	13.5205	1.20162	4.1215	43.4711	0.0903514	0.493023	0.106136	005920m	#N/A	005920m	C10	S3	#N/A	005920m	stress.abiotic.cold	AT5G52300		LTI65 (LOW-TEMPERATURE-INDUCED 65)	CAP160 protein	LOW-TEMPERATURE-INDUCED 65 (LTI65); FUNCTIONS IN: molecular_function unknown; INVOLVED IN: response to water deprivation, response to salt stress, response to cold, abscisic acid mediated signaling pathway, response to abscisic acid stimulus; LOCATED IN: cellular_component unknown; EXPRESSED IN: leaf, seed; EXPRESSED DURING: dry seed stage, LP.04 four leaves visible; CONTAINS InterPro DOMAIN/s: C…
cassava4.1_034394m.g	29.9148	48.9737	32.8321	79.3614	53.7868	64.723	49.7672	49.3599	152.586	31.3519	29.0884	52.1126	034394m	#N/A	#N/A	C10	S3	#N/A	#N/A	stress.abiotic.cold	AT1G07310	loc_os01g63470	C2 domain-containing protein	Calcium-dependent lipid-binding (CaLB domain) family protein	Calcium-dependent lipid-binding (CaLB domain) family protein; CONTAINS InterPro DOMAIN/s: C2 membrane targeting protein (InterPro:IPR018029), C2 calcium/lipid-binding domain, CaLB (InterPro:IPR008973), C2 calcium-dependent membrane targeting (InterPro:IPR000008); BEST Arabidopsis thaliana protein match is: Calcium-dependent lipid-binding (CaLB domain) family protein (TAIR:AT5G23950.1); Has 16203 …
cassava4.1_016540m.g	8.40979	5.48213	14.1826	8.85017	6.76426	22.9097	10.2138	10.5	22.1725	76.5277	9.61395	21.2271	016540m	#N/A	#N/A	C4	S1	#N/A	#N/A	stress.abiotic.cold	AT3G50830	loc_os03g55850	COR413-PM2 (COLD-REGULATED 413-PLASMA MEMBRANE 2)	cold-regulated 413-plasma membrane 2	cold-regulated 413-plasma membrane 2 (COR413-PM2); FUNCTIONS IN: molecular_function unknown; INVOLVED IN: response to stress; LOCATED IN: plasma membrane; EXPRESSED IN: 24 plant structures; EXPRESSED DURING: 13 growth stages; CONTAINS InterPro DOMAIN/s: Cold acclimation WCOR413 (InterPro:IPR008892); BEST Arabidopsis thaliana protein match is: Cold acclimation protein WCOR413 family (TAIR:AT4G3722…
cassava4.1_034338m.g	1.68196	1.21825	4.46695	1.01559	0.981909	1.2519	0.600811	0.588786	0.436896	25.208	119.188	97.9632	034338m	#N/A	#N/A	C1	S4	#N/A	#N/A	stress.abiotic.drought/salt	AT2G41430	loc_os03g23010	ERD15 (EARLY RESPONSIVE TO DEHYDRATION 15); protein binding	dehydration-induced protein (ERD15)	EARLY RESPONSIVE TO DEHYDRATION 15 (ERD15); BEST Arabidopsis thaliana protein match is: unknown protein (TAIR:AT4G14270.2); Has 169 Blast hits to 169 proteins in 23 species: Archae - 0; Bacteria - 0; Metazoa - 0; Fungi - 0; Plants - 169; Viruses - 0; Other Eukaryotes - 0 (source: NCBI BLink).
cassava4.1_003810m.g	1.68196	2.68015	1.45176	14.9437	16.4743	13.5205	18.9256	18.4486	27.306	7.77022	41.7837	36.0861	003810m	#N/A	#N/A	C2	S4	#N/A	#N/A	stress.abiotic.drought/salt	AT1G26850	loc_os09g24900	dehydration-responsive family protein	S-adenosyl-L-methionine-dependent methyltransferases superfamily protein	S-adenosyl-L-methionine-dependent methyltransferases superfamily protein; LOCATED IN: Golgi apparatus, membrane; EXPRESSED IN: 25 plant structures; EXPRESSED DURING: 15 growth stages; CONTAINS InterPro DOMAIN/s: Protein of unknown function DUF248, methyltransferase putative (InterPro:IPR004159); BEST Arabidopsis thaliana protein match is: S-adenosyl-L-methionine-dependent methyltransferases super…
cassava4.1_012167m.g	1.92224	1.9492	2.68017	0.290169	1.96382	1.50227	1.10149	1.5701	11.3593	6.5053	16.5163	44.4708	012167m	#N/A	#N/A	C2	S4	#N/A	#N/A	stress.abiotic.drought/salt	AT1G47980	loc_os04g33150	unknown protein	0	unknown protein; FUNCTIONS IN: molecular_function unknown; INVOLVED IN: biological_process unknown; LOCATED IN: endomembrane system; EXPRESSED IN: 6 plant structures; EXPRESSED DURING: 4 anthesis, F mature embryo stage, petal differentiation and expansion stage, E expanded cotyledon stage; BEST Arabidopsis thaliana protein match is: unknown protein (TAIR:AT3G62730.1); Has 169 Blast hits to 169 pr…
cassava4.1_001625m.g	203.997	119.632	103.522	36.1261	32.9485	19.0288	25.935	29.5374	18.3496	289.757	103.535	78.1158	001625m	#N/A	001625m	C5	S1	#N/A	001625m	stress.abiotic.drought/salt	AT5G64030	loc_os01g66110	dehydration-responsive protein-related	S-adenosyl-L-methionine-dependent methyltransferases superfamily protein	S-adenosyl-L-methionine-dependent methyltransferases superfamily protein; CONTAINS InterPro DOMAIN/s: Protein of unknown function DUF248, methyltransferase putative (InterPro:IPR004159); BEST Arabidopsis thaliana protein match is: S-adenosyl-L-methionine-dependent methyltransferases superfamily protein (TAIR:AT1G29470.2); Has 79879 Blast hits to 39720 proteins in 2025 species: Archae - 377; Bacte…
cassava4.1_001851m.g	71.2429	70.9022	66.2225	7.10915	4.47314	4.38163	3.50473	3.53272	9.17481	71.0162	29.0884	18.4676	001851m	#N/A	#N/A	C5	S1	#N/A	#N/A	stress.abiotic.drought/salt	AT1G32090	loc_os10g42820	early-responsive to dehydration protein-related / ERD protein-related	early-responsive to dehydration stress protein (ERD4)	early-responsive to dehydration stress protein (ERD4); FUNCTIONS IN: molecular_function unknown; INVOLVED IN: biological_process unknown; LOCATED IN: plasma membrane; EXPRESSED IN: 23 plant structures; EXPRESSED DURING: 13 growth stages; CONTAINS InterPro DOMAIN/s: Protein of unknown function DUF221 (InterPro:IPR003864); BEST Arabidopsis thaliana protein match is: ERD (early-responsive to dehydra…
cassava4.1_003674m.g	108.366	89.4197	70.1311	67.4644	44.8405	27.1661	35.0473	39.0562	20.3157	141.4	42.6465	33.3266	003674m	003674m	#N/A	C5	S1	003674m	#N/A	stress.abiotic.drought/salt	AT1G04430	loc_os10g33720	dehydration-responsive protein-related	S-adenosyl-L-methionine-dependent methyltransferases superfamily protein	S-adenosyl-L-methionine-dependent methyltransferases superfamily protein; INVOLVED IN: biological_process unknown; LOCATED IN: Golgi apparatus, plasma membrane; EXPRESSED IN: 26 plant structures; EXPRESSED DURING: 15 growth stages; CONTAINS InterPro DOMAIN/s: Protein of unknown function DUF248, methyltransferase putative (InterPro:IPR004159); BEST Arabidopsis thaliana protein match is: S-adenosyl…
cassava4.1_003857m.g	90.1048	102.82	77.3899	44.3959	39.1673	26.5402	25.1339	27.9673	20.0972	95.2304	28.5953	23.1376	003857m	003857m	#N/A	C5	S1	003857m	#N/A	stress.abiotic.drought/salt	AT4G18030	loc_os09g24900	dehydration-responsive family protein	S-adenosyl-L-methionine-dependent methyltransferases superfamily protein	S-adenosyl-L-methionine-dependent methyltransferases superfamily protein; INVOLVED IN: biological_process unknown; LOCATED IN: Golgi apparatus, plasma membrane, plant-type cell wall; EXPRESSED IN: 24 plant structures; EXPRESSED DURING: 14 growth stages; CONTAINS InterPro DOMAIN/s: Protein of unknown function DUF248, methyltransferase putative (InterPro:IPR004159); BEST Arabidopsis thaliana protei…
cassava4.1_004035m.g	121.461	115.247	99.278	29.5973	23.4567	15.5235	14.4195	17.7617	28.289	171.487	77.0349	50.7328	004035m	#N/A	004035m	C5	S1	#N/A	004035m	stress.abiotic.drought/salt	AT4G19120	loc_os06g01450	ERD3 (early-responsive to dehydration 3)	S-adenosyl-L-methionine-dependent methyltransferases superfamily protein	early-responsive to dehydration 3 (ERD3); CONTAINS InterPro DOMAIN/s: Protein of unknown function DUF248, methyltransferase putative (InterPro:IPR004159); BEST Arabidopsis thaliana protein match is: S-adenosyl-L-methionine-dependent methyltransferases superfamily protein (TAIR:AT1G31850.2); Has 30201 Blast hits to 17322 proteins in 780 species: Archae - 12; Bacteria - 1396; Metazoa - 17338; Fungi…
cassava4.1_027866m.g	40.8475	50.192	135.907	51.7953	23.5658	104.909	50.368	26.7898	49.1508	0.361406	0.246512	0.530678	027866m	#N/A	#N/A	C7	S3	#N/A	#N/A	stress.abiotic.drought/salt	AT5G25610	loc_os04g14990	RD22; nutrient reservoir	BURP domain-containing protein	RESPONSIVE TO DESSICATION 22 (RD22); FUNCTIONS IN: nutrient reservoir activity; INVOLVED IN: response to desiccation, response to salt stress, response to abscisic acid stimulus; LOCATED IN: endomembrane system; EXPRESSED IN: 21 plant structures; EXPRESSED DURING: 13 growth stages; CONTAINS InterPro DOMAIN/s: BURP (InterPro:IPR004873); BEST Arabidopsis thaliana protein match is: unknown seed prot…
cassava4.1_016894m.g	1.32154	4.38571	4.91364	1.01559	0.872808	1.37709	0.20027	0.392524	0.873792	75.8048	770.965	321.166	016894m	#N/A	#N/A	C1	S4	#N/A	#N/A	stress.abiotic.heat	AT1G54400		FUNCTIONS IN: molecular_function unknown; INVOLVED IN: response to heat; LOCATED IN: cellular_component unknown; CONTAINS InterPro DOMAIN/s: HSP20-like chaperone (InterPro:IPR008978); BEST Arabidopsis thaliana protein match is: heat shock family protein (TAIR:AT2G27140.1); Has 35 Blast hits to 35 proteins in 11 species: Archae - 0; Bacteria - 0; Metazoa - 0; Fungi - 0; Plants - 35; Viruses - 0; O…	HSP20-like chaperones superfamily protein	HSP20-like chaperones superfamily protein; CONTAINS InterPro DOMAIN/s: Heat shock protein Hsp20 (InterPro:IPR002068), HSP20-like chaperone (InterPro:IPR008978); BEST Arabidopsis thaliana protein match is: HSP20-like chaperones superfamily protein (TAIR:AT2G27140.1); Has 638 Blast hits to 638 proteins in 68 species: Archae - 0; Bacteria - 6; Metazoa - 0; Fungi - 34; Plants - 583; Viruses - 0; Othe…
cassava4.1_025491m.g	12.855	11.3297	11.279	2.61153	8.83718	8.88846	6.10825	8.04675	11.687	17.1668	82.4581	70.1556	025491m	#N/A	#N/A	C1	S4	#N/A	#N/A	stress.abiotic.heat	AT2G17880		DNAJ heat shock protein, putative	Chaperone DnaJ-domain superfamily protein	Chaperone DnaJ-domain superfamily protein; FUNCTIONS IN: heat shock protein binding; INVOLVED IN: protein folding; LOCATED IN: chloroplast; EXPRESSED IN: 18 plant structures; EXPRESSED DURING: 11 growth stages; CONTAINS InterPro DOMAIN/s: Molecular chaperone, heat shock protein, Hsp40, DnaJ (InterPro:IPR015609), Heat shock protein DnaJ, N-terminal (InterPro:IPR001623); BEST Arabidopsis thaliana p…
cassava4.1_000420m.g	698.733	932.084	938.953	1705.18	1950.62	2813.39	2524.71	3913.27	5798.81	1581.78	74.4465	554.877	000420m	#N/A	#N/A	C10	S3	#N/A	#N/A	stress.abiotic.heat	AT2G46240		BAG6 (BCL-2-ASSOCIATED ATHANOGENE 6); calmodulin binding / protein binding	BCL-2-associated athanogene 6	BCL-2-associated athanogene 6 (BAG6); CONTAINS InterPro DOMAIN/s: Apoptosis regulator, Bcl-2 protein, BAG (InterPro:IPR003103), IQ calmodulin-binding region (InterPro:IPR000048); BEST Arabidopsis thaliana protein match is: BCL-2-associated athanogene 5 (TAIR:AT1G12060.1); Has 21821 Blast hits to 15371 proteins in 1199 species: Archae - 184; Bacteria - 2603; Metazoa - 10110; Fungi - 2300; Plants -…
cassava4.1_001040m.g	59.3491	69.5622	90.4557	44.6861	61.0966	162.746	99.8348	186.94	732.237	208.802	51.5209	47.9733	001040m	#N/A	#N/A	C10	S3	#N/A	#N/A	stress.abiotic.heat	AT5G15450	loc_os03g31300	CLPB3 (CASEIN LYTIC PROTEINASE B3); ATP binding / ATPase/ nucleoside-triphosphatase/ nucleotide binding / protein binding	casein lytic proteinase B3	casein lytic proteinase B3 (CLPB3); FUNCTIONS IN: nucleoside-triphosphatase activity, ATPase activity, nucleotide binding, ATP binding; INVOLVED IN: chloroplast organization, response to heat; LOCATED IN: plastid stroma, chloroplast, chloroplast stroma; EXPRESSED IN: 28 plant structures; EXPRESSED DURING: 14 growth stages; CONTAINS InterPro DOMAIN/s: Clp ATPase, C-terminal (InterPro:IPR019489), A…
cassava4.1_013205m.g	15.498	15.9591	56.5069	22.7783	29.13	88.7594	35.4479	53.0889	173.12	164.62	31.0605	82.3612	013205m	013205m	#N/A	C10	S3	013205m	#N/A	stress.abiotic.heat	AT4G21320	loc_os06g46900	HSA32 (HEAT-STRESS-ASSOCIATED 32); catalytic	Aldolase-type TIM barrel family protein	HEAT-STRESS-ASSOCIATED 32 (HSA32); FUNCTIONS IN: catalytic activity; INVOLVED IN: response to heat, heat acclimation; LOCATED IN: cellular_component unknown; EXPRESSED IN: male gametophyte, pollen tube; EXPRESSED DURING: M germinated pollen stage; CONTAINS InterPro DOMAIN/s: Aldolase-type TIM barrel (InterPro:IPR013785), (2R)-phospho-3-sulpholactate synthase, ComA (InterPro:IPR003830), Peptidase …
cassava4.1_014648m.g	1.08126	0.974601	3.79691	0.725424	0.545505	3.00455	50.1677	107.748	348.643	181.245	6.77907	16.9817	014648m	#N/A	014648m	C10	S3	#N/A	014648m	stress.abiotic.heat	AT4G27670	loc_os05g23140	HSP21 (HEAT SHOCK PROTEIN 21)	heat shock protein 21	heat shock protein 21 (HSP21); CONTAINS InterPro DOMAIN/s: Heat shock protein Hsp20 (InterPro:IPR002068), HSP20-like chaperone (InterPro:IPR008978); BEST Arabidopsis thaliana protein match is: HSP20-like chaperones superfamily protein (TAIR:AT5G51440.1); Has 6158 Blast hits to 6158 proteins in 1414 species: Archae - 225; Bacteria - 3528; Metazoa - 23; Fungi - 170; Plants - 1466; Viruses - 0; Othe…
cassava4.1_015024m.g	21.0245	13.7662	68.121	50.7797	40.5856	118.93	76.4032	111.477	224.455	44.1818	2.46512	5.51905	015024m	#N/A	015024m	C10	S3	#N/A	015024m	stress.abiotic.heat	AT4G27670	loc_os05g23140	HSP21 (HEAT SHOCK PROTEIN 21)	heat shock protein 21	heat shock protein 21 (HSP21); CONTAINS InterPro DOMAIN/s: Heat shock protein Hsp20 (InterPro:IPR002068), HSP20-like chaperone (InterPro:IPR008978); BEST Arabidopsis thaliana protein match is: HSP20-like chaperones superfamily protein (TAIR:AT5G51440.1); Has 6158 Blast hits to 6158 proteins in 1414 species: Archae - 225; Bacteria - 3528; Metazoa - 23; Fungi - 170; Plants - 1466; Viruses - 0; Othe…
cassava4.1_015256m.g	2.4028	0.487301	12.9542	1.45085	1.96382	59.465	72.0973	214.024	951.013	164.259	6.28604	20.5903	015256m	#N/A	015256m	C10	S3	#N/A	015256m	stress.abiotic.heat	AT4G27670	loc_os03g14180	HSP21 (HEAT SHOCK PROTEIN 21)	heat shock protein 21	heat shock protein 21 (HSP21); CONTAINS InterPro DOMAIN/s: Heat shock protein Hsp20 (InterPro:IPR002068), HSP20-like chaperone (InterPro:IPR008978); BEST Arabidopsis thaliana protein match is: HSP20-like chaperones superfamily protein (TAIR:AT5G51440.1); Has 6158 Blast hits to 6158 proteins in 1414 species: Archae - 225; Bacteria - 3528; Metazoa - 23; Fungi - 170; Plants - 1466; Viruses - 0; Othe…
cassava4.1_015518m.g	0.24028	0.365475	5.02532	0.435254	0.545505	3.12974	2.40324	6.47665	31.0196	22.1361	1.47907	6.15586	015518m	015518m	#N/A	C10	S3	015518m	#N/A	stress.abiotic.heat	AT1G52560	loc_os02g10710	26.5 kDa class I small heat shock protein-like (HSP26.5-P)	HSP20-like chaperones superfamily protein	HSP20-like chaperones superfamily protein; FUNCTIONS IN: molecular_function unknown; INVOLVED IN: response to high light intensity, response to hydrogen peroxide, response to heat; LOCATED IN: mitochondrion; EXPRESSED IN: 6 plant structures; EXPRESSED DURING: 4 anthesis, petal differentiation and expansion stage; CONTAINS InterPro DOMAIN/s: Heat shock protein Hsp20 (InterPro:IPR002068), HSP20-lik…
cassava4.1_017865m.g	19.2224	29.238	30.2636	23.2136	49.4228	70.2313	38.9526	63.0001	188.521	16.0826	70.5023	94.3545	017865m	#N/A	#N/A	C10	S3	#N/A	#N/A	stress.abiotic.heat	AT1G80920		J8; heat shock protein binding / unfolded protein binding	Chaperone DnaJ-domain superfamily protein	J8; FUNCTIONS IN: unfolded protein binding, heat shock protein binding; INVOLVED IN: protein folding, response to stress; LOCATED IN: nucleus; EXPRESSED IN: 24 plant structures; EXPRESSED DURING: 15 growth stages; CONTAINS InterPro DOMAIN/s: Molecular chaperone, heat shock protein, Hsp40, DnaJ (InterPro:IPR015609), Heat shock protein DnaJ, N-terminal (InterPro:IPR001623), Heat shock protein DnaJ …
cassava4.1_017871m.g	28.7134	27.4107	58.7404	5.65831	7.85527	128.069	136.885	321.87	772.104	582.496	16.886	51.0512	017871m	017871m	#N/A	C10	S3	017871m	#N/A	stress.abiotic.heat	AT1G53540	loc_os03g16040	17.6 kDa class I small heat shock protein (HSP17.6C-CI) (AA 1-156)	HSP20-like chaperones superfamily protein	HSP20-like chaperones superfamily protein; CONTAINS InterPro DOMAIN/s: Heat shock protein Hsp20 (InterPro:IPR002068), HSP20-like chaperone (InterPro:IPR008978); BEST Arabidopsis thaliana protein match is: heat shock protein 17.4 (TAIR:AT3G46230.1); Has 7090 Blast hits to 7089 proteins in 1610 species: Archae - 175; Bacteria - 4287; Metazoa - 66; Fungi - 302; Plants - 1606; Viruses - 0; Other Euka…
cassava4.1_017918m.g	11.173	18.8829	27.6951	40.4786	77.3526	125.941	86.5168	116.678	220.851	31.2616	81.7186	113.565	017918m	#N/A	#N/A	C10	S3	#N/A	#N/A	stress.abiotic.heat	AT1G80920		J8; heat shock protein binding / unfolded protein binding	Chaperone DnaJ-domain superfamily protein	J8; FUNCTIONS IN: unfolded protein binding, heat shock protein binding; INVOLVED IN: protein folding, response to stress; LOCATED IN: nucleus; EXPRESSED IN: 24 plant structures; EXPRESSED DURING: 15 growth stages; CONTAINS InterPro DOMAIN/s: Molecular chaperone, heat shock protein, Hsp40, DnaJ (InterPro:IPR015609), Heat shock protein DnaJ, N-terminal (InterPro:IPR001623), Heat shock protein DnaJ …
cassava4.1_018131m.g	6.24727	12.548	64.9941	10.1559	16.9107	178.771	201.472	431.09	911.255	931.162	35.7442	67.8206	018131m	#N/A	#N/A	C10	S3	#N/A	#N/A	stress.abiotic.heat	AT2G29500	loc_os01g04380	17.6 kDa class I small heat shock protein (HSP17.6B-CI)	HSP20-like chaperones superfamily protein	HSP20-like chaperones superfamily protein; CONTAINS InterPro DOMAIN/s: Heat shock protein Hsp20 (InterPro:IPR002068), HSP20-like chaperone (InterPro:IPR008978); BEST Arabidopsis thaliana protein match is: HSP20-like chaperones superfamily protein (TAIR:AT1G07400.1); Has 6873 Blast hits to 6873 proteins in 1575 species: Archae - 184; Bacteria - 4083; Metazoa - 80; Fungi - 309; Plants - 1622; Virus…
cassava4.1_016247m.g	44.9323	47.7555	68.9027	79.0712	70.4792	105.785	98.1325	77.7198	154.443	51.7714	199.305	239.76	016247m	#N/A	#N/A	C2	S4	#N/A	#N/A	stress.abiotic.heat	AT4G13830	loc_os01g01160	J20 (DNAJ-LIKE 20); heat shock protein binding	DNAJ-like 20	DNAJ-like 20 (J20); FUNCTIONS IN: heat shock protein binding; INVOLVED IN: protein folding, response to stress; LOCATED IN: nucleus; EXPRESSED IN: 23 plant structures; EXPRESSED DURING: 13 growth stages; CONTAINS InterPro DOMAIN/s: Molecular chaperone, heat shock protein, Hsp40, DnaJ (InterPro:IPR015609), Heat shock protein DnaJ, N-terminal (InterPro:IPR001623), Heat shock protein DnaJ, conserved…
cassava4.1_016534m.g	19.8231	17.9083	29.8169	16.5397	18.0017	18.7784	21.1285	15.5047	13.3253	123.51	373.835	422.632	016534m	#N/A	#N/A	C2	S4	#N/A	#N/A	stress.abiotic.heat	AT4G13830	loc_os01g01160	J20 (DNAJ-LIKE 20); heat shock protein binding	DNAJ-like 20	DNAJ-like 20 (J20); FUNCTIONS IN: heat shock protein binding; INVOLVED IN: protein folding, response to stress; LOCATED IN: nucleus; EXPRESSED IN: 23 plant structures; EXPRESSED DURING: 13 growth stages; CONTAINS InterPro DOMAIN/s: Molecular chaperone, heat shock protein, Hsp40, DnaJ (InterPro:IPR015609), Heat shock protein DnaJ, N-terminal (InterPro:IPR001623), Heat shock protein DnaJ, conserved…
cassava4.1_018456m.g	56.9463	81.2574	77.5016	173.086	155.469	199.552	169.529	138.169	202.938	29.9063	167.135	280.41	018456m	#N/A	#N/A	C2	S4	#N/A	#N/A	stress.abiotic.heat	AT2G17880		DNAJ heat shock protein, putative	Chaperone DnaJ-domain superfamily protein	Chaperone DnaJ-domain superfamily protein; FUNCTIONS IN: heat shock protein binding; INVOLVED IN: protein folding; LOCATED IN: chloroplast; EXPRESSED IN: 18 plant structures; EXPRESSED DURING: 11 growth stages; CONTAINS InterPro DOMAIN/s: Molecular chaperone, heat shock protein, Hsp40, DnaJ (InterPro:IPR015609), Heat shock protein DnaJ, N-terminal (InterPro:IPR001623); BEST Arabidopsis thaliana p…
cassava4.1_001300m.g	80.7339	80.7701	137.47	88.0664	121.866	138.71	126.471	155.636	120.146	808.465	42.7698	175.124	001300m	#N/A	001300m	C4	S1	#N/A	001300m	stress.abiotic.heat	AT1G74310	loc_os05g44340	ATHSP101 (ARABIDOPSIS THALIANA HEAT SHOCK PROTEIN 101); ATP binding / ATPase/ nucleoside-triphosphatase/ nucleotide binding / protein binding	heat shock protein 101	heat shock protein 101 (HSP101); FUNCTIONS IN: protein binding, ATPase activity, ATP binding; INVOLVED IN: response to high light intensity, response to hydrogen peroxide, response to heat, protein unfolding; EXPRESSED IN: 12 plant structures; EXPRESSED DURING: 6 growth stages; CONTAINS InterPro DOMAIN/s: Clp ATPase, C-terminal (InterPro:IPR019489), ATPase, AAA+ type, core (InterPro:IPR003593), A…
cassava4.1_001564m.g	88.7833	69.0749	47.6847	37.2868	65.5697	34.6775	56.0757	85.2759	69.4664	219.464	57.5604	49.8837	001564m	#N/A	#N/A	C4	S1	#N/A	#N/A	stress.abiotic.heat	AT4G16660	loc_os02g48110	heat shock protein 70, putative / HSP70, putative	heat shock protein 70 (Hsp 70) family protein	heat shock protein 70 (Hsp 70) family protein; FUNCTIONS IN: ATP binding; LOCATED IN: plasma membrane, chloroplast; EXPRESSED IN: 24 plant structures; EXPRESSED DURING: 13 growth stages; CONTAINS InterPro DOMAIN/s: Heat shock protein 70, conserved site (InterPro:IPR018181), Heat shock protein Hsp70 (InterPro:IPR001023), Heat shock protein 70 (InterPro:IPR013126); BEST Arabidopsis thaliana protein…
cassava4.1_001607m.g	109.688	79.6736	97.3795	106.347	113.247	117.428	98.8334	111.084	106.275	445.704	141.498	134.686	001607m	#N/A	#N/A	C4	S1	#N/A	#N/A	stress.abiotic.heat	AT1G79920	loc_os01g08560	ATP binding	Heat shock protein 70 (Hsp 70) family protein	Heat shock protein 70 (Hsp 70) family protein; FUNCTIONS IN: ATP binding; LOCATED IN: cell wall, plasma membrane; EXPRESSED IN: male gametophyte, guard cell, cultured cell, pollen tube; EXPRESSED DURING: L mature pollen stage, M germinated pollen stage; CONTAINS InterPro DOMAIN/s: Heat shock protein Hsp70 (InterPro:IPR001023), Heat shock protein 70 (InterPro:IPR013126); BEST Arabidopsis thaliana …
cassava4.1_001827m.g	1037.65	655.785	456.522	236.488	529.794	213.198	387.123	567.197	352.356	2357.09	733.249	464.449	001827m	#N/A	001827m	C4	S1	#N/A	001827m	stress.abiotic.heat	AT4G24190	loc_os06g50300	SHD (SHEPHERD); ATP binding / unfolded protein binding	Chaperone protein htpG family protein	SHEPHERD (SHD); FUNCTIONS IN: unfolded protein binding, ATP binding; INVOLVED IN: in 8 processes; LOCATED IN: in 7 components; EXPRESSED IN: 25 plant structures; EXPRESSED DURING: 16 growth stages; CONTAINS InterPro DOMAIN/s: Chaperone protein htpG (InterPro:IPR001404), Heat shock protein Hsp90, C-terminal (InterPro:IPR020576), Heat shock protein Hsp90, N-terminal (InterPro:IPR020575), Molecular …
cassava4.1_001924m.g	76.4089	67.613	48.4664	77.3302	99.9365	91.5136	99.7347	134.734	90.219	201.393	69.886	63.2568	001924m	#N/A	#N/A	C4	S1	#N/A	#N/A	stress.abiotic.heat	AT3G07770	loc_os12g32986	ATP binding	HEAT SHOCK PROTEIN 89.1	HEAT SHOCK PROTEIN 89.1 (Hsp89.1); FUNCTIONS IN: ATP binding; INVOLVED IN: protein folding, response to stress; LOCATED IN: mitochondrion, cell wall; EXPRESSED IN: 24 plant structures; EXPRESSED DURING: 14 growth stages; CONTAINS InterPro DOMAIN/s: Chaperone protein htpG (InterPro:IPR001404), Heat shock protein Hsp90, C-terminal (InterPro:IPR020576), Heat shock protein Hsp90, conserved site (Inte…
cassava4.1_002708m.g	22.346	22.4158	50.0298	15.6692	27.8208	36.8057	53.5723	110.299	124.843	3088.39	132.5	248.888	002708m	002708m	002708m	C4	S1	002708m	002708m	stress.abiotic.heat	AT5G52640	loc_os04g01740	ATHSP90.1 (HEAT SHOCK PROTEIN 90.1); ATP binding / unfolded protein binding	heat shock protein 90.1	heat shock protein 90.1 (HSP90.1); FUNCTIONS IN: unfolded protein binding, ATP binding; INVOLVED IN: defense response to bacterium, response to heat, response to arsenic; LOCATED IN: cytosol, cell wall, plasma membrane; EXPRESSED IN: 25 plant structures; EXPRESSED DURING: 14 growth stages; CONTAINS InterPro DOMAIN/s: Chaperone protein htpG (InterPro:IPR001404), Heat shock protein Hsp90, conserved…
cassava4.1_002964m.g	155.461	71.6332	47.238	165.832	119.466	87.2571	129.575	126.589	49.8061	381.735	113.026	82.0428	002964m	#N/A	#N/A	C4	S1	#N/A	#N/A	stress.abiotic.heat	AT5G09590	loc_os02g53420	MTHSC70-2 (MITOCHONDRIAL HSP70 2); ATP binding	mitochondrial HSO70 2	mitochondrial HSO70 2 (MTHSC70-2); FUNCTIONS IN: ATP binding; INVOLVED IN: protein folding, response to cadmium ion, response to salt stress, response to virus, response to heat; LOCATED IN: mitochondrion, cell wall, plasma membrane, chloroplast, mitochondrial matrix; EXPRESSED IN: 26 plant structures; EXPRESSED DURING: 16 growth stages; CONTAINS InterPro DOMAIN/s: Heat shock protein 70, conserve…
cassava4.1_003144m.g	845.784	407.627	256.291	204.424	317.593	170.633	318.53	385.459	321.337	1781.1	321.081	302.062	003144m	#N/A	#N/A	C4	S1	#N/A	#N/A	stress.abiotic.heat	AT5G42020	loc_os02g02410	BIP2; ATP binding	Heat shock protein 70 (Hsp 70) family protein	BIP2; FUNCTIONS IN: ATP binding; INVOLVED IN: protein folding, response to cadmium ion, response to heat, polar nucleus fusion, response to endoplasmic reticulum stress; LOCATED IN: in 8 components; EXPRESSED IN: 8 plant structures; EXPRESSED DURING: seedling growth, seed development stages; CONTAINS InterPro DOMAIN/s: Heat shock protein 70, conserved site (InterPro:IPR018181), Heat shock protein…
cassava4.1_003149m.g	469.747	246.209	138.252	109.974	219.948	85.88	190.557	207.547	161.105	931.071	132.746	136.597	003149m	#N/A	#N/A	C4	S1	#N/A	#N/A	stress.abiotic.heat	AT5G28540	loc_os02g02410	BIP1; ATP binding	heat shock protein 70 (Hsp 70) family protein	BIP1; FUNCTIONS IN: ATP binding; INVOLVED IN: protein folding, ER-associated protein catabolic process, response to heat, polar nucleus fusion; LOCATED IN: cell wall, plasma membrane, chloroplast, vacuole, endoplasmic reticulum lumen; EXPRESSED IN: 8 plant structures; EXPRESSED DURING: L mature pollen stage, M germinated pollen stage, seedling growth; CONTAINS InterPro DOMAIN/s: Heat shock protei…
cassava4.1_003240m.g	1.44168	0.730951	3.68523	1.74102	0.872808	4.50682	9.1123	32.2851	78.0951	389.324	8.38139	9.2338	003240m	#N/A	003240m	C4	S1	#N/A	003240m	stress.abiotic.heat	AT1G16030	loc_os05g38530	Hsp70b (heat shock protein 70B); ATP binding	heat shock protein 70B	heat shock protein 70B (Hsp70b); FUNCTIONS IN: ATP binding; INVOLVED IN: protein folding, response to heat; LOCATED IN: cytosol, cell wall, plasma membrane, chloroplast, membrane; EXPRESSED IN: 19 plant structures; EXPRESSED DURING: 10 growth stages; CONTAINS InterPro DOMAIN/s: Heat shock protein 70, conserved site (InterPro:IPR018181), Heat shock protein Hsp70 (InterPro:IPR001023), Heat shock pr…
cassava4.1_003244m.g	0.840979	2.19285	2.45682	2.90169	2.18202	4.50682	8.91203	15.9954	35.0609	228.77	3.32791	11.9933	003244m	#N/A	#N/A	C4	S1	#N/A	#N/A	stress.abiotic.heat	AT1G16030	loc_os03g16920	Hsp70b (heat shock protein 70B); ATP binding	heat shock protein 70B	heat shock protein 70B (Hsp70b); FUNCTIONS IN: ATP binding; INVOLVED IN: protein folding, response to heat; LOCATED IN: cytosol, cell wall, plasma membrane, chloroplast, membrane; EXPRESSED IN: 19 plant structures; EXPRESSED DURING: 10 growth stages; CONTAINS InterPro DOMAIN/s: Heat shock protein 70, conserved site (InterPro:IPR018181), Heat shock protein Hsp70 (InterPro:IPR001023), Heat shock pr…
cassava4.1_003328m.g	384.688	121.581	122.953	191.802	141.94	104.533	199.469	100.781	43.4711	658.301	109.821	172.046	003328m	#N/A	#N/A	C4	S1	#N/A	#N/A	stress.abiotic.heat	AT5G02500	loc_os11g47760	HSC70-1 (HEAT SHOCK COGNATE PROTEIN 70-1); ATP binding	heat shock cognate protein 70-1	heat shock cognate protein 70-1 (HSC70-1); FUNCTIONS IN: ATP binding; INVOLVED IN: protein folding, response to cadmium ion, response to cold, response to virus, response to heat; LOCATED IN: in 9 components; EXPRESSED IN: 29 plant structures; EXPRESSED DURING: 16 growth stages; CONTAINS InterPro DOMAIN/s: Heat shock protein 70, conserved site (InterPro:IPR018181), Heat shock protein Hsp70 (Inter…
cassava4.1_003340m.g	15.1376	26.9234	86.2121	77.04	80.0801	168.004	162.92	250.43	246.955	2108.71	233.2	832.528	003340m	#N/A	003340m	C4	S1	#N/A	003340m	stress.abiotic.heat	AT5G02500	loc_os11g47760	HSC70-1 (HEAT SHOCK COGNATE PROTEIN 70-1); ATP binding	heat shock cognate protein 70-1	heat shock cognate protein 70-1 (HSC70-1); FUNCTIONS IN: ATP binding; INVOLVED IN: protein folding, response to cadmium ion, response to cold, response to virus, response to heat; LOCATED IN: in 9 components; EXPRESSED IN: 29 plant structures; EXPRESSED DURING: 16 growth stages; CONTAINS InterPro DOMAIN/s: Heat shock protein 70, conserved site (InterPro:IPR018181), Heat shock protein Hsp70 (Inter…
cassava4.1_003343m.g	355.734	198.21	250.261	624.3	377.271	309.969	445.602	264.561	126.918	1295.46	265	425.073	003343m	#N/A	#N/A	C4	S1	#N/A	#N/A	stress.abiotic.heat	AT3G12580	loc_os11g47760	HSP70 (heat shock protein 70); ATP binding	heat shock protein 70	heat shock protein 70 (HSP70); FUNCTIONS IN: ATP binding; INVOLVED IN: in 9 processes; LOCATED IN: cytosol, mitochondrion, cell wall, plasma membrane; EXPRESSED IN: 23 plant structures; EXPRESSED DURING: 11 growth stages; CONTAINS InterPro DOMAIN/s: Heat shock protein 70, conserved site (InterPro:IPR018181), Heat shock protein Hsp70 (InterPro:IPR001023), Heat shock protein 70 (InterPro:IPR013126)…
cassava4.1_003346m.g	58.1477	32.5273	37.7457	91.6936	51.3866	30.7966	102.639	58.0936	47.5124	365.833	52.3837	82.149	003346m	003346m	#N/A	C4	S1	003346m	#N/A	stress.abiotic.heat	AT5G02500	loc_os11g47760	HSC70-1 (HEAT SHOCK COGNATE PROTEIN 70-1); ATP binding	heat shock cognate protein 70-1	heat shock cognate protein 70-1 (HSC70-1); FUNCTIONS IN: ATP binding; INVOLVED IN: protein folding, response to cadmium ion, response to cold, response to virus, response to heat; LOCATED IN: in 9 components; EXPRESSED IN: 29 plant structures; EXPRESSED DURING: 16 growth stages; CONTAINS InterPro DOMAIN/s: Heat shock protein 70, conserved site (InterPro:IPR018181), Heat shock protein Hsp70 (Inter…
cassava4.1_004123m.g	4.08475	1.21825	1.00506	0	1.96382	0.876327	1.40189	1.76636	1.63836	32.7976	3.82093	3.39634	004123m	#N/A	#N/A	C4	S1	#N/A	#N/A	stress.abiotic.heat	AT4G24190	loc_os06g50300	SHD (SHEPHERD); ATP binding / unfolded protein binding	Chaperone protein htpG family protein	SHEPHERD (SHD); FUNCTIONS IN: unfolded protein binding, ATP binding; INVOLVED IN: in 8 processes; LOCATED IN: in 7 components; EXPRESSED IN: 25 plant structures; EXPRESSED DURING: 16 growth stages; CONTAINS InterPro DOMAIN/s: Chaperone protein htpG (InterPro:IPR001404), Heat shock protein Hsp90, C-terminal (InterPro:IPR020576), Heat shock protein Hsp90, N-terminal (InterPro:IPR020575), Molecular …
cassava4.1_005868m.g	0.12014	0.24365	0.335021	0	0.327303	0.250379	0.20027	2.74767	3.16749	32.7976	5.42325	4.35156	005868m	#N/A	#N/A	C4	S1	#N/A	#N/A	stress.abiotic.heat	AT5G28540	loc_os03g50250	BIP1; ATP binding	heat shock protein 70 (Hsp 70) family protein	BIP1; FUNCTIONS IN: ATP binding; INVOLVED IN: protein folding, ER-associated protein catabolic process, response to heat, polar nucleus fusion; LOCATED IN: cell wall, plasma membrane, chloroplast, vacuole, endoplasmic reticulum lumen; EXPRESSED IN: 8 plant structures; EXPRESSED DURING: L mature pollen stage, M germinated pollen stage, seedling growth; CONTAINS InterPro DOMAIN/s: Heat shock protei…
cassava4.1_006710m.g	43.3705	24.9742	16.8627	7.10915	13.8558	8.26251	15.9215	19.8225	12.3423	75.6241	21.9395	16.6633	006710m	#N/A	#N/A	C4	S1	#N/A	#N/A	stress.abiotic.heat	AT5G03160	loc_os01g74580	ATP58IPK (ARABIDOPSIS HOMOLOG OF MAMALLIAN P58IPK); binding / heat shock protein binding	homolog of mamallian P58IPK	homolog of mamallian P58IPK (P58IPK); FUNCTIONS IN: heat shock protein binding, binding; INVOLVED IN: protein folding; LOCATED IN: endoplasmic reticulum, plasma membrane, endoplasmic reticulum lumen; EXPRESSED IN: 25 plant structures; EXPRESSED DURING: 14 growth stages; CONTAINS InterPro DOMAIN/s: Molecular chaperone, heat shock protein, Hsp40, DnaJ (InterPro:IPR015609), Tetratricopeptide-like he…
cassava4.1_008490m.g	35.6815	23.8777	36.0706	56.438	58.2599	57.8376	103.44	73.9908	60.5101	487.717	104.398	250.692	008490m	#N/A	#N/A	C4	S1	#N/A	#N/A	stress.abiotic.heat	AT3G44110	loc_os03g44620	ATJ3; protein binding	DNAJ homologue 3	DNAJ homologue 3 (ATJ3); FUNCTIONS IN: unfolded protein binding, heat shock protein binding, ATP binding; INVOLVED IN: protein folding, response to salt stress, regulation of ATPase activity; LOCATED IN: nucleolus, cell wall, plasma membrane; EXPRESSED IN: 28 plant structures; EXPRESSED DURING: 15 growth stages; CONTAINS InterPro DOMAIN/s: Molecular chaperone, heat shock protein, Hsp40, DnaJ (Int…
cassava4.1_008510m.g	77.1297	50.192	62.2023	185.418	135.176	154.985	209.583	185.762	150.292	361.135	77.8976	113.777	008510m	#N/A	#N/A	C4	S1	#N/A	#N/A	stress.abiotic.heat	AT3G44110	loc_os03g44620	ATJ3; protein binding	DNAJ homologue 3	DNAJ homologue 3 (ATJ3); FUNCTIONS IN: unfolded protein binding, heat shock protein binding, ATP binding; INVOLVED IN: protein folding, response to salt stress, regulation of ATPase activity; LOCATED IN: nucleolus, cell wall, plasma membrane; EXPRESSED IN: 28 plant structures; EXPRESSED DURING: 15 growth stages; CONTAINS InterPro DOMAIN/s: Molecular chaperone, heat shock protein, Hsp40, DnaJ (Int…
cassava4.1_010980m.g	112.691	96.7292	65.2175	31.7736	63.1695	30.1707	60.1813	91.1637	65.862	209.254	37.7163	32.5836	010980m	#N/A	010980m	C4	S1	#N/A	010980m	stress.abiotic.heat	AT3G62600	loc_os05g06440	ATERDJ3B; heat shock protein binding / unfolded protein binding	DNAJ heat shock family protein	ATERDJ3B; FUNCTIONS IN: unfolded protein binding, heat shock protein binding; INVOLVED IN: protein folding, PAMP-induced immunity; LOCATED IN: plasma membrane, endoplasmic reticulum lumen; EXPRESSED IN: 23 plant structures; EXPRESSED DURING: 15 growth stages; CONTAINS InterPro DOMAIN/s: Molecular chaperone, heat shock protein, Hsp40, DnaJ (InterPro:IPR015609), HSP40/DnaJ peptide-binding (InterPro…
cassava4.1_011001m.g	34.9607	32.2837	19.6546	10.0108	27.3844	11.5174	22.0297	25.2197	28.7259	64.782	17.5023	13.1608	011001m	#N/A	#N/A	C4	S1	#N/A	#N/A	stress.abiotic.heat	AT3G62600	loc_os05g06440	ATERDJ3B; heat shock protein binding / unfolded protein binding	DNAJ heat shock family protein	ATERDJ3B; FUNCTIONS IN: unfolded protein binding, heat shock protein binding; INVOLVED IN: protein folding, PAMP-induced immunity; LOCATED IN: plasma membrane, endoplasmic reticulum lumen; EXPRESSED IN: 23 plant structures; EXPRESSED DURING: 15 growth stages; CONTAINS InterPro DOMAIN/s: Molecular chaperone, heat shock protein, Hsp40, DnaJ (InterPro:IPR015609), HSP40/DnaJ peptide-binding (InterPro…
cassava4.1_011173m.g	8.65006	7.06586	13.0658	13.7831	15.0559	20.1555	26.1353	30.0281	36.6992	172.752	34.1418	84.1655	011173m	#N/A	#N/A	C4	S1	#N/A	#N/A	stress.abiotic.heat	AT2G20560	loc_os05g48810	DNAJ heat shock family protein	DNAJ heat shock family protein	DNAJ heat shock family protein; FUNCTIONS IN: unfolded protein binding, heat shock protein binding; INVOLVED IN: protein folding; LOCATED IN: cellular_component unknown; EXPRESSED IN: 10 plant structures; EXPRESSED DURING: M germinated pollen stage, 4 anthesis, C globular stage, petal differentiation and expansion stage; CONTAINS InterPro DOMAIN/s: Molecular chaperone, heat shock protein, Hsp40, …
cassava4.1_016267m.g	3.00349	1.9492	2.01013	2.03119	3.05483	3.38012	4.50608	10.5	19.8788	206.363	7.39535	13.1608	016267m	#N/A	#N/A	C4	S1	#N/A	#N/A	stress.abiotic.heat	AT5G51440	loc_os02g52150	23.5 kDa mitochondrial small heat shock protein (HSP23.5-M)	HSP20-like chaperones superfamily protein	HSP20-like chaperones superfamily protein; CONTAINS InterPro DOMAIN/s: Heat shock protein Hsp20 (InterPro:IPR002068), HSP20-like chaperone (InterPro:IPR008978); BEST Arabidopsis thaliana protein match is: mitochondrion-localized small heat shock protein 23.6 (TAIR:AT4G25200.1); Has 3995 Blast hits to 3995 proteins in 1037 species: Archae - 138; Bacteria - 2214; Metazoa - 5; Fungi - 114; Plants - …
cassava4.1_016281m.g	33.2787	45.6844	108.547	75.7342	114.447	364.427	186.952	311.86	695.757	1159.3	64.8325	187.542	016281m	#N/A	#N/A	C4	S1	#N/A	#N/A	stress.abiotic.heat	AT4G25200	loc_os02g52150	ATHSP23.6-MITO (MITOCHONDRION-LOCALIZED SMALL HEAT SHOCK PROTEIN 23.6)	mitochondrion-localized small heat shock protein 23.6	mitochondrion-localized small heat shock protein 23.6 (HSP23.6-MITO); FUNCTIONS IN: molecular_function unknown; INVOLVED IN: response to cadmium ion, response to heat; EXPRESSED IN: 6 plant structures; EXPRESSED DURING: 4 anthesis, petal differentiation and expansion stage; CONTAINS InterPro DOMAIN/s: Heat shock protein Hsp20 (InterPro:IPR002068), HSP20-like chaperone (InterPro:IPR008978); BEST A…
cassava4.1_016548m.g	0.12014	0	0.335021	0	0.109101	0	0.801082	4.71029	5.4612	110.048	1.23256	4.13929	016548m	#N/A	#N/A	C4	S1	#N/A	#N/A	stress.abiotic.heat	AT4G10250	loc_os04g36750	ATHSP22.0	HSP20-like chaperones superfamily protein	ATHSP22.0; FUNCTIONS IN: molecular_function unknown; INVOLVED IN: response to heat; LOCATED IN: endomembrane system; EXPRESSED IN: 8 plant structures; EXPRESSED DURING: M germinated pollen stage, 4 anthesis, C globular stage, petal differentiation and expansion stage; CONTAINS InterPro DOMAIN/s: Heat shock protein Hsp20 (InterPro:IPR002068), HSP20-like chaperone (InterPro:IPR008978); BEST Arabido…
cassava4.1_017974m.g	44.692	43.6134	87.9989	74.7186	85.4261	92.6403	67.1907	94.2058	185.571	611.408	22.9256	272.344	017974m	#N/A	#N/A	C4	S1	#N/A	#N/A	stress.abiotic.heat	AT5G59720	loc_os01g04380	HSP18.2 (heat shock protein 18.2)	heat shock protein 18.2	heat shock protein 18.2 (HSP18.2); CONTAINS InterPro DOMAIN/s: Heat shock protein Hsp20 (InterPro:IPR002068), HSP20-like chaperone (InterPro:IPR008978); BEST Arabidopsis thaliana protein match is: HSP20-like chaperones superfamily protein (TAIR:AT1G53540.1); Has 1807 Blast hits to 1807 proteins in 277 species: Archae - 0; Bacteria - 0; Metazoa - 736; Fungi - 347; Plants - 385; Viruses - 0; Other …
cassava4.1_018038m.g	4.56531	7.06586	48.3547	5.94847	7.97002	95.1363	73.9357	197.186	506.278	1171.45	26.2535	108.046	018038m	#N/A	#N/A	C4	S1	#N/A	#N/A	stress.abiotic.heat	AT3G46230	loc_os03g16020	ATHSP17.4	heat shock protein 17.4	heat shock protein 17.4 (HSP17.4); INVOLVED IN: response to heat; LOCATED IN: cellular_component unknown; EXPRESSED IN: 15 plant structures; EXPRESSED DURING: M germinated pollen stage, LP.04 four leaves visible, 4 anthesis, C globular stage, petal differentiation and expansion stage; CONTAINS InterPro DOMAIN/s: Heat shock protein Hsp20 (InterPro:IPR002068), HSP20-like chaperone (InterPro:IPR0089…
cassava4.1_018127m.g	46.1337	39.2277	182.028	78.6359	81.4984	269.283	125.369	185.958	372.017	933.24	41.6605	175.761	018127m	#N/A	#N/A	C4	S1	#N/A	#N/A	stress.abiotic.heat	AT1G07400	loc_os03g16040	17.8 kDa class I heat shock protein (HSP17.8-CI)	HSP20-like chaperones superfamily protein	HSP20-like chaperones superfamily protein; CONTAINS InterPro DOMAIN/s: Heat shock protein Hsp20 (InterPro:IPR002068), HSP20-like chaperone (InterPro:IPR008978); BEST Arabidopsis thaliana protein match is: HSP20-like chaperones superfamily protein (TAIR:AT1G59860.1); Has 7238 Blast hits to 7237 proteins in 1623 species: Archae - 225; Bacteria - 4290; Metazoa - 129; Fungi - 318; Plants - 1626; Viru…
cassava4.1_018134m.g	6.24727	6.09126	6.8121	14.6536	23.1294	34.8027	41.2557	68.4955	41.8328	311.893	15.7767	33.4327	018134m	#N/A	#N/A	C4	S1	#N/A	#N/A	stress.abiotic.heat	AT2G29500	loc_os01g04380	17.6 kDa class I small heat shock protein (HSP17.6B-CI)	HSP20-like chaperones superfamily protein	HSP20-like chaperones superfamily protein; CONTAINS InterPro DOMAIN/s: Heat shock protein Hsp20 (InterPro:IPR002068), HSP20-like chaperone (InterPro:IPR008978); BEST Arabidopsis thaliana protein match is: HSP20-like chaperones superfamily protein (TAIR:AT1G07400.1); Has 6873 Blast hits to 6873 proteins in 1575 species: Archae - 184; Bacteria - 4083; Metazoa - 80; Fungi - 309; Plants - 1622; Virus…
cassava4.1_018158m.g	19.5828	10.3551	91.9075	9.86576	8.61898	209.317	117.859	294.688	1051.06	1494.23	59.779	221.293	018158m	018158m	018158m	C4	S1	018158m	018158m	stress.abiotic.heat	AT5G12020	loc_os01g08860	HSP17.6II (17.6 KDA CLASS II HEAT SHOCK PROTEIN)	17.6 kDa class II heat shock protein	17.6 kDa class II heat shock protein (HSP17.6II); CONTAINS InterPro DOMAIN/s: Heat shock protein Hsp20 (InterPro:IPR002068), HSP20-like chaperone (InterPro:IPR008978); BEST Arabidopsis thaliana protein match is: heat shock protein 17.6A (TAIR:AT5G12030.1); Has 1807 Blast hits to 1807 proteins in 277 species: Archae - 0; Bacteria - 0; Metazoa - 736; Fungi - 347; Plants - 385; Viruses - 0; Other Eu…
cassava4.1_018200m.g	0.961118	1.4619	12.0608	3.48203	4.69134	18.5281	8.71176	14.7197	36.0439	93.9655	2.83488	19.6351	018200m	018200m	018200m	C4	S1	018200m	018200m	stress.abiotic.heat	AT1G54050	loc_os02g54140	17.4 kDa class III heat shock protein (HSP17.4-CIII)	HSP20-like chaperones superfamily protein	HSP20-like chaperones superfamily protein; CONTAINS InterPro DOMAIN/s: Heat shock protein Hsp20 (InterPro:IPR002068), HSP20-like chaperone (InterPro:IPR008978); BEST Arabidopsis thaliana protein match is: heat shock protein 17.6A (TAIR:AT5G12030.1); Has 4491 Blast hits to 4491 proteins in 1181 species: Archae - 166; Bacteria - 2520; Metazoa - 2; Fungi - 140; Plants - 1242; Viruses - 0; Other Euka…
cassava4.1_019659m.g	6.00699	4.87301	6.14206	17.8454	20.511	14.2716	21.4289	23.944	12.7792	118.902	24.4046	43.6217	019659m	#N/A	019659m	C4	S1	#N/A	019659m	stress.abiotic.heat	AT5G37670	loc_os06g14240	15.7 kDa class I-related small heat shock protein-like (HSP15.7-CI)	HSP20-like chaperones superfamily protein	HSP20-like chaperones superfamily protein; CONTAINS InterPro DOMAIN/s: Heat shock protein Hsp20 (InterPro:IPR002068), HSP20-like chaperone (InterPro:IPR008978); BEST Arabidopsis thaliana protein match is: HSP20-like chaperones superfamily protein (TAIR:AT1G59860.1); Has 1807 Blast hits to 1807 proteins in 277 species: Archae - 0; Bacteria - 0; Metazoa - 736; Fungi - 347; Plants - 385; Viruses - 0…
cassava4.1_022774m.g	0	0	0	0	0	0.500758	1.90257	5.6916	7.53645	45.8985	0.986046	1.16749	022774m	#N/A	#N/A	C4	S1	#N/A	#N/A	stress.abiotic.heat	AT2G29500	loc_os01g04380	17.6 kDa class I small heat shock protein (HSP17.6B-CI)	HSP20-like chaperones superfamily protein	HSP20-like chaperones superfamily protein; CONTAINS InterPro DOMAIN/s: Heat shock protein Hsp20 (InterPro:IPR002068), HSP20-like chaperone (InterPro:IPR008978); BEST Arabidopsis thaliana protein match is: HSP20-like chaperones superfamily protein (TAIR:AT1G07400.1); Has 6873 Blast hits to 6873 proteins in 1575 species: Archae - 184; Bacteria - 4083; Metazoa - 80; Fungi - 309; Plants - 1622; Virus…
cassava4.1_023227m.g	0.12014	0.365475	0.446695	0	0	0	0.100135	4.4159	5.78887	44.3626	2.2186	1.16749	023227m	#N/A	#N/A	C4	S1	#N/A	#N/A	stress.abiotic.heat	AT5G59720	loc_os01g04380	HSP18.2 (heat shock protein 18.2)	heat shock protein 18.2	heat shock protein 18.2 (HSP18.2); CONTAINS InterPro DOMAIN/s: Heat shock protein Hsp20 (InterPro:IPR002068), HSP20-like chaperone (InterPro:IPR008978); BEST Arabidopsis thaliana protein match is: HSP20-like chaperones superfamily protein (TAIR:AT1G53540.1); Has 1807 Blast hits to 1807 proteins in 277 species: Archae - 0; Bacteria - 0; Metazoa - 736; Fungi - 347; Plants - 385; Viruses - 0; Other …
cassava4.1_024326m.g	0.24028	0.487301	0.335021	0	0.109101	0.500758	0.500676	2.94393	11.0316	75.8952	1.60233	4.98837	024326m	#N/A	#N/A	C4	S1	#N/A	#N/A	stress.abiotic.heat	AT1G53540	loc_os03g16040	17.6 kDa class I small heat shock protein (HSP17.6C-CI) (AA 1-156)	HSP20-like chaperones superfamily protein	HSP20-like chaperones superfamily protein; CONTAINS InterPro DOMAIN/s: Heat shock protein Hsp20 (InterPro:IPR002068), HSP20-like chaperone (InterPro:IPR008978); BEST Arabidopsis thaliana protein match is: heat shock protein 17.4 (TAIR:AT3G46230.1); Has 7090 Blast hits to 7089 proteins in 1610 species: Archae - 175; Bacteria - 4287; Metazoa - 66; Fungi - 302; Plants - 1606; Viruses - 0; Other Euka…
cassava4.1_028591m.g	0.480559	0.609126	0.89339	1.01559	1.41831	1.87784	3.00406	17.2711	21.1894	556.474	8.87442	12.9485	028591m	028591m	#N/A	C4	S1	028591m	#N/A	stress.abiotic.heat	AT4G10250	loc_os04g36750	ATHSP22.0	HSP20-like chaperones superfamily protein	ATHSP22.0; FUNCTIONS IN: molecular_function unknown; INVOLVED IN: response to heat; LOCATED IN: endomembrane system; EXPRESSED IN: 8 plant structures; EXPRESSED DURING: M germinated pollen stage, 4 anthesis, C globular stage, petal differentiation and expansion stage; CONTAINS InterPro DOMAIN/s: Heat shock protein Hsp20 (InterPro:IPR002068), HSP20-like chaperone (InterPro:IPR008978); BEST Arabido…
cassava4.1_028846m.g	0.12014	0.121825	0	0	0.109101	0.12519	0.20027	1.76636	1.74758	109.145	2.58837	4.7761	028846m	028846m	#N/A	C4	S1	028846m	#N/A	stress.abiotic.heat	AT1G07400	loc_os03g15960	17.8 kDa class I heat shock protein (HSP17.8-CI)	HSP20-like chaperones superfamily protein	HSP20-like chaperones superfamily protein; CONTAINS InterPro DOMAIN/s: Heat shock protein Hsp20 (InterPro:IPR002068), HSP20-like chaperone (InterPro:IPR008978); BEST Arabidopsis thaliana protein match is: HSP20-like chaperones superfamily protein (TAIR:AT1G59860.1); Has 7238 Blast hits to 7237 proteins in 1623 species: Archae - 225; Bacteria - 4290; Metazoa - 129; Fungi - 318; Plants - 1626; Viru…
cassava4.1_029521m.g	492.934	257.66	212.403	373.738	304.937	208.441	324.738	246.8	110.644	708.988	235.295	292.616	029521m	#N/A	#N/A	C4	S1	#N/A	#N/A	stress.abiotic.heat	AT5G56030	loc_os08g39140	HSP81-2 (HEAT SHOCK PROTEIN 81-2); ATP binding	heat shock protein 81-2	heat shock protein 81-2 (HSP81-2); FUNCTIONS IN: protein binding, ATP binding; INVOLVED IN: in 9 processes; LOCATED IN: cytosol, mitochondrion, cell wall, nucleus; EXPRESSED IN: 28 plant structures; EXPRESSED DURING: 14 growth stages; CONTAINS InterPro DOMAIN/s: Chaperone protein htpG (InterPro:IPR001404), Heat shock protein Hsp90, conserved site (InterPro:IPR019805), Heat shock protein Hsp90, C-…
cassava4.1_029550m.g	0.360419	0.24365	1.00506	0	0.218202	1.00152	2.80379	8.83179	14.7452	119.716	1.72558	2.01658	029550m	#N/A	#N/A	C4	S1	#N/A	#N/A	stress.abiotic.heat	AT5G59720	loc_os03g16020	HSP18.2 (heat shock protein 18.2)	heat shock protein 18.2	heat shock protein 18.2 (HSP18.2); CONTAINS InterPro DOMAIN/s: Heat shock protein Hsp20 (InterPro:IPR002068), HSP20-like chaperone (InterPro:IPR008978); BEST Arabidopsis thaliana protein match is: HSP20-like chaperones superfamily protein (TAIR:AT1G53540.1); Has 1807 Blast hits to 1807 proteins in 277 species: Archae - 0; Bacteria - 0; Metazoa - 736; Fungi - 347; Plants - 385; Viruses - 0; Other …
cassava4.1_031320m.g	0.12014	0.24365	0.446695	0.145085	0.436404	0.625948	2.40324	6.86917	10.5947	88.0023	1.60233	0.95522	031320m	#N/A	#N/A	C4	S1	#N/A	#N/A	stress.abiotic.heat	AT1G53540	loc_os01g04380	17.6 kDa class I small heat shock protein (HSP17.6C-CI) (AA 1-156)	HSP20-like chaperones superfamily protein	HSP20-like chaperones superfamily protein; CONTAINS InterPro DOMAIN/s: Heat shock protein Hsp20 (InterPro:IPR002068), HSP20-like chaperone (InterPro:IPR008978); BEST Arabidopsis thaliana protein match is: heat shock protein 17.4 (TAIR:AT3G46230.1); Has 7090 Blast hits to 7089 proteins in 1610 species: Archae - 175; Bacteria - 4287; Metazoa - 66; Fungi - 302; Plants - 1606; Viruses - 0; Other Euka…
cassava4.1_031583m.g	0	0	0.335021	0	0.545505	0.751137	0.700946	2.74767	3.27672	41.2906	0.616279	0.530678	031583m	#N/A	#N/A	C4	S1	#N/A	#N/A	stress.abiotic.heat	AT1G16030	loc_os05g38530	Hsp70b (heat shock protein 70B); ATP binding	heat shock protein 70B	heat shock protein 70B (Hsp70b); FUNCTIONS IN: ATP binding; INVOLVED IN: protein folding, response to heat; LOCATED IN: cytosol, cell wall, plasma membrane, chloroplast, membrane; EXPRESSED IN: 19 plant structures; EXPRESSED DURING: 10 growth stages; CONTAINS InterPro DOMAIN/s: Heat shock protein 70, conserved site (InterPro:IPR018181), Heat shock protein Hsp70 (InterPro:IPR001023), Heat shock pr…
cassava4.1_032436m.g	0.961118	0.974601	0.670042	0.290169	0.545505	0.625948	0.500676	9.12619	9.17481	158.115	2.83488	1.69817	032436m	#N/A	#N/A	C4	S1	#N/A	#N/A	stress.abiotic.heat	AT4G10250	loc_os04g36750	ATHSP22.0	HSP20-like chaperones superfamily protein	ATHSP22.0; FUNCTIONS IN: molecular_function unknown; INVOLVED IN: response to heat; LOCATED IN: endomembrane system; EXPRESSED IN: 8 plant structures; EXPRESSED DURING: M germinated pollen stage, 4 anthesis, C globular stage, petal differentiation and expansion stage; CONTAINS InterPro DOMAIN/s: Heat shock protein Hsp20 (InterPro:IPR002068), HSP20-like chaperone (InterPro:IPR008978); BEST Arabido…
cassava4.1_032445m.g	1.68196	1.70555	2.5685	1.45085	1.41831	1.62746	5.00676	18.3505	17.9127	232.294	4.80698	2.9718	032445m	#N/A	#N/A	C4	S1	#N/A	#N/A	stress.abiotic.heat	AT5G59720	loc_os01g04380	HSP18.2 (heat shock protein 18.2)	heat shock protein 18.2	heat shock protein 18.2 (HSP18.2); CONTAINS InterPro DOMAIN/s: Heat shock protein Hsp20 (InterPro:IPR002068), HSP20-like chaperone (InterPro:IPR008978); BEST Arabidopsis thaliana protein match is: HSP20-like chaperones superfamily protein (TAIR:AT1G53540.1); Has 1807 Blast hits to 1807 proteins in 277 species: Archae - 0; Bacteria - 0; Metazoa - 736; Fungi - 347; Plants - 385; Viruses - 0; Other …
cassava4.1_033681m.g	21.0245	21.1976	21.8881	47.4427	57.278	60.5918	95.4288	119.818	90.0005	1396.83	106.739	255.787	033681m	#N/A	#N/A	C4	S1	#N/A	#N/A	stress.abiotic.heat	AT5G52640	loc_os04g01740	ATHSP90.1 (HEAT SHOCK PROTEIN 90.1); ATP binding / unfolded protein binding	heat shock protein 90.1	heat shock protein 90.1 (HSP90.1); FUNCTIONS IN: unfolded protein binding, ATP binding; INVOLVED IN: defense response to bacterium, response to heat, response to arsenic; LOCATED IN: cytosol, cell wall, plasma membrane; EXPRESSED IN: 25 plant structures; EXPRESSED DURING: 14 growth stages; CONTAINS InterPro DOMAIN/s: Chaperone protein htpG (InterPro:IPR001404), Heat shock protein Hsp90, conserved…
cassava4.1_033696m.g	0.720839	0.487301	3.35021	0.725424	1.09101	2.00303	4.30581	14.7197	20.2064	119.445	2.34186	2.44112	033696m	#N/A	#N/A	C4	S1	#N/A	#N/A	stress.abiotic.heat	AT3G46230	loc_os01g04380	ATHSP17.4	heat shock protein 17.4	heat shock protein 17.4 (HSP17.4); INVOLVED IN: response to heat; LOCATED IN: cellular_component unknown; EXPRESSED IN: 15 plant structures; EXPRESSED DURING: M germinated pollen stage, LP.04 four leaves visible, 4 anthesis, C globular stage, petal differentiation and expansion stage; CONTAINS InterPro DOMAIN/s: Heat shock protein Hsp20 (InterPro:IPR002068), HSP20-like chaperone (InterPro:IPR0089…
cassava4.1_034243m.g	4.20489	2.19285	5.02532	4.7878	3.16393	3.25493	6.00811	8.92993	29.272	72.0101	4.80698	8.38471	034243m	#N/A	034243m	C4	S1	#N/A	034243m	stress.abiotic.heat	AT2G32120	loc_os03g11910	HSP70T-2 (HEAT-SHOCK PROTEIN 70T-2); ATP binding	heat-shock protein 70T-2	heat-shock protein 70T-2 (HSP70T-2); FUNCTIONS IN: ATP binding; INVOLVED IN: protein folding, response to high light intensity, response to hydrogen peroxide, response to heat; LOCATED IN: cellular_component unknown; EXPRESSED IN: 23 plant structures; EXPRESSED DURING: 12 growth stages; CONTAINS InterPro DOMAIN/s: Heat shock protein 70, conserved site (InterPro:IPR018181), Heat shock protein Hsp7…
cassava4.1_034419m.g	1.68196	1.21825	2.23347	1.30576	1.74562	3.00455	6.20838	19.7243	32.7672	261.206	6.53256	4.66997	034419m	#N/A	#N/A	C4	S1	#N/A	#N/A	stress.abiotic.heat	AT3G46230	loc_os01g04380	ATHSP17.4	heat shock protein 17.4	heat shock protein 17.4 (HSP17.4); INVOLVED IN: response to heat; LOCATED IN: cellular_component unknown; EXPRESSED IN: 15 plant structures; EXPRESSED DURING: M germinated pollen stage, LP.04 four leaves visible, 4 anthesis, C globular stage, petal differentiation and expansion stage; CONTAINS InterPro DOMAIN/s: Heat shock protein Hsp20 (InterPro:IPR002068), HSP20-like chaperone (InterPro:IPR0089…
cassava4.1_004176m.g	39.7663	46.1717	30.5986	4.64271	4.69134	3.00455	2.60352	1.17757	0.983016	57.4635	5.05349	3.07793	004176m	#N/A	#N/A	C5	S1	#N/A	#N/A	stress.abiotic.heat	AT2G47440	loc_os07g49000	DNAJ heat shock N-terminal domain-containing protein	Tetratricopeptide repeat (TPR)-like superfamily protein	Tetratricopeptide repeat (TPR)-like superfamily protein; FUNCTIONS IN: binding, heat shock protein binding; INVOLVED IN: protein folding; LOCATED IN: cellular_component unknown; EXPRESSED IN: 22 plant structures; EXPRESSED DURING: 13 growth stages; CONTAINS InterPro DOMAIN/s: Tetratricopeptide TPR-1 (InterPro:IPR001440), Tetratricopeptide-like helical (InterPro:IPR011990), Heat shock protein DnaJ…
cassava4.1_003331m.g	1938.46	1077.67	920.303	1998.4	1507.99	730.606	1277.02	853.053	333.133	1897.11	635.753	660.376	003331m	003331m	003331m	C5	S2	003331m	003331m	stress.abiotic.heat	AT5G02500	loc_os11g47760	HSC70-1 (HEAT SHOCK COGNATE PROTEIN 70-1); ATP binding	heat shock cognate protein 70-1	heat shock cognate protein 70-1 (HSC70-1); FUNCTIONS IN: ATP binding; INVOLVED IN: protein folding, response to cadmium ion, response to cold, response to virus, response to heat; LOCATED IN: in 9 components; EXPRESSED IN: 29 plant structures; EXPRESSED DURING: 16 growth stages; CONTAINS InterPro DOMAIN/s: Heat shock protein 70, conserved site (InterPro:IPR018181), Heat shock protein Hsp70 (Inter…
cassava4.1_014639m.g	12.6147	19.492	65.1058	22.4881	8.61898	69.981	10.1137	6.28039	41.1774	0.0903514	0.246512	2.65339	014639m	#N/A	#N/A	C7	S3	#N/A	#N/A	stress.abiotic.heat	AT4G09350	loc_os11g10990	DNAJ heat shock N-terminal domain-containing protein	Chaperone DnaJ-domain superfamily protein	Chaperone DnaJ-domain superfamily protein; FUNCTIONS IN: heat shock protein binding; INVOLVED IN: protein folding; LOCATED IN: chloroplast; EXPRESSED IN: 21 plant structures; EXPRESSED DURING: 13 growth stages; CONTAINS InterPro DOMAIN/s: Molecular chaperone, heat shock protein, Hsp40, DnaJ (InterPro:IPR015609), Heat shock protein DnaJ, N-terminal (InterPro:IPR001623), Heat shock protein DnaJ, co…
cassava4.1_006681m.g	94.9104	196.504	12.6191	368.805	407.056	70.1062	388.525	395.664	71.3232	7.13776	8.13488	8.38471	006681m	#N/A	#N/A	C8	S2	#N/A	#N/A	stress.abiotic.heat	AT5G23240	loc_os04g57880	DNAJ heat shock N-terminal domain-containing protein	DNAJ heat shock N-terminal domain-containing protein	DNAJ heat shock N-terminal domain-containing protein; FUNCTIONS IN: unfolded protein binding, heat shock protein binding; INVOLVED IN: protein folding; LOCATED IN: chloroplast; EXPRESSED IN: 21 plant structures; EXPRESSED DURING: 11 growth stages; CONTAINS InterPro DOMAIN/s: Molecular chaperone, heat shock protein, Hsp40, DnaJ (InterPro:IPR015609), Heat shock protein DnaJ, N-terminal (InterPro:IP…
cassava4.1_014651m.g	122.182	171.408	77.8366	333.115	242.095	191.54	243.529	178.108	45.7648	20.3291	79.0069	100.723	014651m	#N/A	#N/A	C8	S2	#N/A	#N/A	stress.abiotic.heat	AT3G14200	loc_os06g09560	DNAJ heat shock N-terminal domain-containing protein	Chaperone DnaJ-domain superfamily protein	Chaperone DnaJ-domain superfamily protein; FUNCTIONS IN: heat shock protein binding; INVOLVED IN: protein folding; LOCATED IN: cellular_component unknown; EXPRESSED IN: 19 plant structures; EXPRESSED DURING: 11 growth stages; CONTAINS InterPro DOMAIN/s: Molecular chaperone, heat shock protein, Hsp40, DnaJ (InterPro:IPR015609), Heat shock protein DnaJ, N-terminal (InterPro:IPR001623); BEST Arabido…
cassava4.1_014653m.g	49.9782	76.0189	41.9893	205.875	101.355	125.19	131.978	76.9347	29.0536	63.5171	30.9372	49.3531	014653m	#N/A	#N/A	C8	S2	#N/A	#N/A	stress.abiotic.heat	AT3G14200	loc_os06g09560	DNAJ heat shock N-terminal domain-containing protein	Chaperone DnaJ-domain superfamily protein	Chaperone DnaJ-domain superfamily protein; FUNCTIONS IN: heat shock protein binding; INVOLVED IN: protein folding; LOCATED IN: cellular_component unknown; EXPRESSED IN: 19 plant structures; EXPRESSED DURING: 11 growth stages; CONTAINS InterPro DOMAIN/s: Molecular chaperone, heat shock protein, Hsp40, DnaJ (InterPro:IPR015609), Heat shock protein DnaJ, N-terminal (InterPro:IPR001623); BEST Arabido…
cassava4.1_014855m.g	102.239	258.026	3.35021	439.462	705.665	33.676	444.6	492.912	12.3423	1.08422	1.23256	1.16749	014855m	#N/A	014855m	C8	S2	#N/A	014855m	stress.abiotic.heat	AT1G06460		ACD32.1 (ALPHA-CRYSTALLIN DOMAIN 32.1)	alpha-crystallin domain 32.1	alpha-crystallin domain 32.1 (ACD32.1); INVOLVED IN: response to heat; LOCATED IN: peroxisome; EXPRESSED IN: 23 plant structures; EXPRESSED DURING: 15 growth stages; CONTAINS InterPro DOMAIN/s: Heat shock protein Hsp20 (InterPro:IPR002068), HSP20-like chaperone (InterPro:IPR008978); BEST Arabidopsis thaliana protein match is: heat shock protein 17.6A (TAIR:AT5G12030.1); Has 3590 Blast hits to 359…
cassava4.1_017077m.g	12.014	12.548	0.446695	29.7424	46.3679	3.6305	33.7456	27.673	7.42723	13.1913	0.986046	2.33498	017077m	#N/A	#N/A	C8	S2	#N/A	#N/A	stress.abiotic.heat	AT1G71000	loc_os01g42190	heat shock protein binding	Chaperone DnaJ-domain superfamily protein	Chaperone DnaJ-domain superfamily protein; FUNCTIONS IN: heat shock protein binding; INVOLVED IN: protein folding; LOCATED IN: cellular_component unknown; EXPRESSED IN: 7 plant structures; EXPRESSED DURING: 4 anthesis, petal differentiation and expansion stage; CONTAINS InterPro DOMAIN/s: Molecular chaperone, heat shock protein, Hsp40, DnaJ (InterPro:IPR015609), Heat shock protein DnaJ, N-termina…
cassava4.1_018093m.g	50.9393	101.846	37.299	244.613	364.397	78.9946	147.499	213.141	48.0585	3.43335	15.0372	33.9634	018093m	#N/A	#N/A	C8	S2	#N/A	#N/A	stress.abiotic.heat	AT1G53540	loc_os03g16040	17.6 kDa class I small heat shock protein (HSP17.6C-CI) (AA 1-156)	HSP20-like chaperones superfamily protein	HSP20-like chaperones superfamily protein; CONTAINS InterPro DOMAIN/s: Heat shock protein Hsp20 (InterPro:IPR002068), HSP20-like chaperone (InterPro:IPR008978); BEST Arabidopsis thaliana protein match is: heat shock protein 17.4 (TAIR:AT3G46230.1); Has 7090 Blast hits to 7089 proteins in 1610 species: Archae - 175; Bacteria - 4287; Metazoa - 66; Fungi - 302; Plants - 1606; Viruses - 0; Other Euka…
cassava4.1_018376m.g	65.356	81.9883	20.2129	271.599	187.872	12.7693	106.544	89.4955	19.1142	179.709	19.8442	25.5787	018376m	#N/A	#N/A	C8	S2	#N/A	#N/A	stress.abiotic.heat	AT1G53540	loc_os03g16040	17.6 kDa class I small heat shock protein (HSP17.6C-CI) (AA 1-156)	HSP20-like chaperones superfamily protein	HSP20-like chaperones superfamily protein; CONTAINS InterPro DOMAIN/s: Heat shock protein Hsp20 (InterPro:IPR002068), HSP20-like chaperone (InterPro:IPR008978); BEST Arabidopsis thaliana protein match is: heat shock protein 17.4 (TAIR:AT3G46230.1); Has 7090 Blast hits to 7089 proteins in 1610 species: Archae - 175; Bacteria - 4287; Metazoa - 66; Fungi - 302; Plants - 1606; Viruses - 0; Other Euka…
cassava4.1_022833m.g	2.04238	7.79681	0.670042	28.8719	58.4781	13.7709	57.3775	61.6263	6.11654	0.180703	0.369767	0.318407	022833m	#N/A	#N/A	C8	S2	#N/A	#N/A	stress.abiotic.heat	AT5G23240	loc_os06g28050	DNAJ heat shock N-terminal domain-containing protein	DNAJ heat shock N-terminal domain-containing protein	DNAJ heat shock N-terminal domain-containing protein; FUNCTIONS IN: unfolded protein binding, heat shock protein binding; INVOLVED IN: protein folding; LOCATED IN: chloroplast; EXPRESSED IN: 21 plant structures; EXPRESSED DURING: 11 growth stages; CONTAINS InterPro DOMAIN/s: Molecular chaperone, heat shock protein, Hsp40, DnaJ (InterPro:IPR015609), Heat shock protein DnaJ, N-terminal (InterPro:IP…
cassava4.1_011399m.g	2.16252	1.70555	5.58369	0.580339	1.52741	2.3786	1.50203	2.06075	1.41991	8.58339	67.1744	37.8904	011399m	#N/A	#N/A	C1	S4	#N/A	#N/A	stress.abiotic.touch/wounding	AT5G66050	loc_os08g26870	LOCATED IN: chloroplast; EXPRESSED IN: 24 plant structures; EXPRESSED DURING: 15 growth stages; CONTAINS InterPro DOMAIN/s: Protein of unknown function DUF151 (InterPro:IPR003729); BEST Arabidopsis thaliana protein match is: wound-responsive family protein (TAIR:AT1G19660.2); Has 338 Blast hits to 338 proteins in 128 species: Archae - 11; Bacteria - 214; Metazoa - 0; Fungi - 0; Plants - 67; Virus…	Wound-responsive family protein	Wound-responsive family protein; FUNCTIONS IN: DNA binding, nuclease activity; INVOLVED IN: nucleotide-excision repair; LOCATED IN: chloroplast; EXPRESSED IN: 24 plant structures; EXPRESSED DURING: 15 growth stages; CONTAINS InterPro DOMAIN/s: Protein of unknown function DUF151 (InterPro:IPR003729), UvrB/UvrC protein (InterPro:IPR001943); BEST Arabidopsis thaliana protein match is: Wound-responsi…
cassava4.1_020195m.g	0.720839	0.24365	1.11674	1.01559	0.545505	1.12671	0.801082	0.392524	0.436896	59.0898	176.995	268.311	020195m	#N/A	#N/A	C2	S4	#N/A	#N/A	stress.abiotic.touch/wounding	AT4G10265	loc_os04g54280	wound-responsive protein, putative	Wound-responsive family protein	Wound-responsive family protein; CONTAINS InterPro DOMAIN/s: Protein of unknown function wound-induced (InterPro:IPR022251); BEST Arabidopsis thaliana protein match is: Wound-responsive family protein (TAIR:AT4G10270.1); Has 164 Blast hits to 163 proteins in 16 species: Archae - 0; Bacteria - 0; Metazoa - 0; Fungi - 0; Plants - 164; Viruses - 0; Other Eukaryotes - 0 (source: NCBI BLink).
cassava4.1_020294m.g	0	0	0.558369	0.435254	0.327303	0.375569	0.20027	0.098131	0	34.6046	251.688	325.836	020294m	#N/A	#N/A	C2	S4	#N/A	#N/A	stress.abiotic.touch/wounding	AT4G10265	loc_os04g54280	wound-responsive protein, putative	Wound-responsive family protein	Wound-responsive family protein; CONTAINS InterPro DOMAIN/s: Protein of unknown function wound-induced (InterPro:IPR022251); BEST Arabidopsis thaliana protein match is: Wound-responsive family protein (TAIR:AT4G10270.1); Has 164 Blast hits to 163 proteins in 16 species: Archae - 0; Bacteria - 0; Metazoa - 0; Fungi - 0; Plants - 164; Viruses - 0; Other Eukaryotes - 0 (source: NCBI BLink).
cassava4.1_020376m.g	0.360419	0.852776	2.23347	0.725424	0.327303	1.37709	0.400541	1.17757	3.71361	55.9275	180.2	190.726	020376m	#N/A	#N/A	C2	S4	#N/A	#N/A	stress.abiotic.touch/wounding	AT4G10270	loc_os04g54280	wound-responsive family protein	Wound-responsive family protein	Wound-responsive family protein; CONTAINS InterPro DOMAIN/s: Protein of unknown function wound-induced (InterPro:IPR022251); BEST Arabidopsis thaliana protein match is: Wound-responsive family protein (TAIR:AT4G10265.1); Has 183 Blast hits to 182 proteins in 16 species: Archae - 0; Bacteria - 0; Metazoa - 0; Fungi - 0; Plants - 183; Viruses - 0; Other Eukaryotes - 0 (source: NCBI BLink).
cassava4.1_011710m.g	37.7239	63.4709	18.7612	72.1071	157.76	31.5478	172.233	209.804	68.3742	32.2555	41.6605	49.2469	011710m	#N/A	#N/A	C8	S2	#N/A	#N/A	stress.abiotic.touch/wounding	AT1G75380	loc_os08g26870	wound-responsive protein-related	bifunctional nuclease in basal defense response 1	bifunctional nuclease in basal defense response 1 (BBD1); CONTAINS InterPro DOMAIN/s: Protein of unknown function DUF151 (InterPro:IPR003729), UvrB/UvrC protein (InterPro:IPR001943); BEST Arabidopsis thaliana protein match is: Wound-responsive family protein (TAIR:AT1G19660.2); Has 843 Blast hits to 843 proteins in 291 species: Archae - 44; Bacteria - 501; Metazoa - 0; Fungi - 0; Plants - 105; Vi…

## Sheet: Table S3
Table S3. A list of 92 hormone related DE genes in this study.
geneid	FL00	FL03	FL24	FEL00	FEL03	FEL24	BL00	BL03	BL24	RT00	RT03	RT24	groupinfo	mapman.ANN	At.homolog	rice.homolog	mapman.description	TAIR10.short_description	TAIR10.ANN
cassava4.1_013991m.g	0	0.121825	1.89845	0.290169	0	1.12671	1.00135	4.80842	24.2477	25.1177	20.0907	63.5752	C2	hormone metabolism.abscisic acid.induced-regulated-responsive-activated	AT5G13200	loc_os12g29400	GRAM domain-containing protein / ABA-responsive protein-related	GRAM domain family protein	GRAM domain family protein; CONTAINS InterPro DOMAIN/s: GRAM (InterPro:IPR004182); BEST Arabidopsis thaliana protein match is: GRAM domain family protein (TAIR:AT2G22475.1); Has 1807 Blast hits to 1807 proteins in 277 species: Archae - 0; Bacteria - 0; Metazoa - 736; Fungi - 347; Plants - 385; Viruses - 0; Other Eukaryotes - 339 (source: NCBI BLink).
cassava4.1_018636m.g	25.8301	31.3091	53.2684	66.739	78.9891	150.603	55.7753	66.8272	160.887	29.6353	145.565	202.401	C2	hormone metabolism.abscisic acid.induced-regulated-responsive-activated	AT5G50720	loc_os11g30500	ATHVA22E	HVA22 homologue E	HVA22 homologue E (HVA22E); FUNCTIONS IN: molecular_function unknown; INVOLVED IN: response to water deprivation, response to cold, hyperosmotic salinity response, response to abscisic acid stimulus; LOCATED IN: endomembrane system; EXPRESSED IN: 22 plant structures; EXPRESSED DURING: 12 growth stages; CONTAINS InterPro DOMAIN/s: TB2/DP1/HVA22 related protein (InterPro:IPR004345); BEST Arabidopsi…
cassava4.1_010216m.g	16.8196	22.1722	30.4869	14.2183	33.8213	31.1722	20.728	33.2664	25.34	9.21585	43.2628	48.3978	C2	hormone metabolism.abscisic acid.signal transduction	AT1G45249	loc_os02g52780	ABF2 (ABSCISIC ACID RESPONSIVE ELEMENTS-BINDING FACTOR 2); DNA binding / protein binding / transcription activator/ transcription factor	abscisic acid responsive elements-binding factor 2	abscisic acid responsive elements-binding factor 2 (ABF2); FUNCTIONS IN: protein binding, DNA binding, transcription activator activity, sequence-specific DNA binding transcription factor activity; INVOLVED IN: in 6 processes; LOCATED IN: nucleus; EXPRESSED IN: hydathode, leaf vascular system, whole plant, root, cultured cell; CONTAINS InterPro DOMAIN/s: Basic-leucine zipper (bZIP) transcription …
cassava4.1_021582m.g	0.480559	0.609126	1.78678	2.03119	2.18202	2.87936	2.20297	1.37383	5.4612	72.3715	269.93	168.543	C1	hormone metabolism.abscisic acid.synthesis-degradation	AT3G43600	loc_os07g18120	AAO2 (ALDEHYDE OXIDASE 2); aldehyde oxidase	aldehyde oxidase 2	aldehyde oxidase 2 (AAO2); FUNCTIONS IN: aldehyde oxidase activity; INVOLVED IN: oxidation reduction; EXPRESSED IN: 16 plant structures; EXPRESSED DURING: 13 growth stages; CONTAINS InterPro DOMAIN/s: Aldehyde oxidase/xanthine dehydrogenase (InterPro:IPR016208), Ferredoxin (InterPro:IPR001041), Molybdopterin dehydrogenase, FAD-binding (InterPro:IPR002346), [2Fe-2S]-binding (InterPro:IPR002888), F…
cassava4.1_003979m.g	11.6536	28.5071	9.15725	41.4942	22.8021	20.1555	19.0257	39.0562	2.2937	1.08422	1.60233	3.2902	C8	hormone metabolism.abscisic acid.synthesis-degradation.synthesis.9-cis-epoxycarotenoid dioxygenase	AT1G30100	loc_os03g44380	NCED5 (NINE-CIS-EPOXYCAROTENOID DIOXYGENASE 5); 9-cis-epoxycarotenoid dioxygenase	nine-cis-epoxycarotenoid dioxygenase 5	nine-cis-epoxycarotenoid dioxygenase 5 (NCED5); CONTAINS InterPro DOMAIN/s: Carotenoid oxygenase (InterPro:IPR004294); BEST Arabidopsis thaliana protein match is: nine-cis-epoxycarotenoid dioxygenase 2 (TAIR:AT4G18350.1); Has 2882 Blast hits to 2845 proteins in 494 species: Archae - 16; Bacteria - 802; Metazoa - 232; Fungi - 202; Plants - 893; Viruses - 0; Other Eukaryotes - 737 (source: NCBI BLi…
cassava4.1_034379m.g	0.12014	0.852776	1.11674	1.30576	7.96437	1.62746	0.500676	4.31777	2.40293	5.78249	25.7605	42.8788	C2	hormone metabolism.abscisic acid.synthesis-degradation.synthesis.9-cis-epoxycarotenoid dioxygenase	AT3G14440	loc_os03g44380	NCED3 (NINE-CIS-EPOXYCAROTENOID DIOXYGENASE 3); 9-cis-epoxycarotenoid dioxygenase	nine-cis-epoxycarotenoid dioxygenase 3	nine-cis-epoxycarotenoid dioxygenase 3 (NCED3); CONTAINS InterPro DOMAIN/s: Carotenoid oxygenase (InterPro:IPR004294); BEST Arabidopsis thaliana protein match is: nine-cis-epoxycarotenoid dioxygenase 9 (TAIR:AT1G78390.1); Has 2945 Blast hits to 2901 proteins in 493 species: Archae - 16; Bacteria - 796; Metazoa - 281; Fungi - 204; Plants - 893; Viruses - 0; Other Eukaryotes - 755 (source: NCBI BLi…
cassava4.1_003838m.g	3.84447	2.4365	32.2737	0.145085	0.872808	0.876327	0.100135	0.588786	0.983016	45.2661	57.9302	85.7576	C2	hormone metabolism.auxin.induced-regulated-responsive-activated	AT5G54510	loc_os01g57610	DFL1 (DWARF IN LIGHT 1); indole-3-acetic acid amido synthetase	Auxin-responsive GH3 family protein	DWARF IN LIGHT 1 (DFL1); FUNCTIONS IN: indole-3-acetic acid amido synthetase activity; INVOLVED IN: auxin homeostasis, response to auxin stimulus, auxin mediated signaling pathway, unidimensional cell growth; LOCATED IN: chloroplast, cytoplasm; EXPRESSED IN: 19 plant structures; EXPRESSED DURING: 12 growth stages; CONTAINS InterPro DOMAIN/s: GH3 auxin-responsive promoter (InterPro:IPR004993); BES…
cassava4.1_004017m.g	4.32503	0.974601	4.46695	3.19186	3.16393	3.50531	4.80649	4.1215	15.7282	53.6687	20.3372	10.2952	C4	hormone metabolism.auxin.induced-regulated-responsive-activated	AT2G44500	loc_os04g47520	unknown protein	O-fucosyltransferase family protein	O-fucosyltransferase family protein; CONTAINS InterPro DOMAIN/s: GDP-fucose protein O-fucosyltransferase (InterPro:IPR019378); BEST Arabidopsis thaliana protein match is: O-fucosyltransferase family protein (TAIR:AT3G07900.1); Has 821 Blast hits to 820 proteins in 30 species: Archae - 0; Bacteria - 0; Metazoa - 0; Fungi - 0; Plants - 820; Viruses - 0; Other Eukaryotes - 1 (source: NCBI BLink).
cassava4.1_004196m.g	62.8331	83.3284	83.1969	247.515	169.325	91.764	115.957	109.416	22.8278	7.58952	3.45116	3.50247	C8	hormone metabolism.auxin.induced-regulated-responsive-activated	AT4G03400	loc_os05g50890	DFL2 (DWARF IN LIGHT 2)	Auxin-responsive GH3 family protein	DWARF IN LIGHT 2 (DFL2); INVOLVED IN: response to auxin stimulus, response to light stimulus; LOCATED IN: chloroplast; EXPRESSED IN: 24 plant structures; EXPRESSED DURING: 14 growth stages; CONTAINS InterPro DOMAIN/s: GH3 auxin-responsive promoter (InterPro:IPR004993); BEST Arabidopsis thaliana protein match is: Auxin-responsive GH3 family protein (TAIR:AT2G46370.4); Has 1425 Blast hits to 1352 p…
cassava4.1_008405m.g	208.443	207.225	160.699	92.1288	69.7155	39.8103	32.2435	40.5281	14.8545	110.409	34.6349	32.5836	C6	hormone metabolism.auxin.induced-regulated-responsive-activated	AT1G51630	loc_os09g32320	unknown protein	O-fucosyltransferase family protein	O-fucosyltransferase family protein; CONTAINS InterPro DOMAIN/s: GDP-fucose protein O-fucosyltransferase (InterPro:IPR019378); BEST Arabidopsis thaliana protein match is: O-fucosyltransferase family protein (TAIR:AT3G21190.1); Has 751 Blast hits to 749 proteins in 27 species: Archae - 0; Bacteria - 0; Metazoa - 0; Fungi - 0; Plants - 751; Viruses - 0; Other Eukaryotes - 0 (source: NCBI BLink).
cassava4.1_009064m.g	138.641	186.392	115.582	383.604	179.689	118.555	134.482	106.57	38.4468	69.0285	10.2302	13.0547	C8	hormone metabolism.auxin.induced-regulated-responsive-activated	AT3G25290	loc_os08g41280	auxin-responsive family protein	Auxin-responsive family protein	Auxin-responsive family protein; INVOLVED IN: multicellular organismal development; LOCATED IN: plasma membrane, membrane; EXPRESSED IN: 19 plant structures; EXPRESSED DURING: 9 growth stages; CONTAINS InterPro DOMAIN/s: Cytochrome b561, eukaryote (InterPro:IPR004877), Uncharacterised conserved protein UCP037471 (InterPro:IPR017214), Protein of unknown function DUF568, DOMON-like (InterPro:IPR007…
cassava4.1_009438m.g	0.720839	2.4365	1.67511	0.435254	0.763707	1.12671	0.100135	0	0.436896	7.58952	8.6279	33.9634	C2	hormone metabolism.auxin.induced-regulated-responsive-activated	AT5G47530	loc_os03g09900	auxin-responsive protein, putative	Auxin-responsive family protein	Auxin-responsive family protein; CONTAINS InterPro DOMAIN/s: Cytochrome b561, eukaryote (InterPro:IPR004877), Uncharacterised conserved protein UCP037471 (InterPro:IPR017214), Protein of unknown function DUF568, DOMON-like (InterPro:IPR007613), DOMON related (InterPro:IPR005018), Cytochrome b561/ferric reductase transmembrane (InterPro:IPR006593); BEST Arabidopsis thaliana protein match is: Auxin…
cassava4.1_010909m.g	1.2014	1.9492	2.34515	1.45085	0.981909	1.62746	0.600811	0.686917	0.873792	47.0731	10.6	14.5406	C4	hormone metabolism.auxin.induced-regulated-responsive-activated	AT3G07570	loc_os01g67030	membrane protein, putative	Cytochrome b561/ferric reductase transmembrane with DOMON related domain	Cytochrome b561/ferric reductase transmembrane with DOMON related domain; FUNCTIONS IN: dopamine beta-monooxygenase activity; INVOLVED IN: histidine catabolic process; LOCATED IN: membrane; CONTAINS InterPro DOMAIN/s: Cytochrome b561, eukaryote (InterPro:IPR004877), DOMON related (InterPro:IPR005018), Cytochrome b561/ferric reductase transmembrane (InterPro:IPR006593), DOMON (InterPro:IPR013050);…
cassava4.1_010932m.g	31.5968	46.2936	27.8068	429.886	291.409	148.725	275.372	181.15	37.6823	11.565	14.4209	13.4792	C8	hormone metabolism.auxin.induced-regulated-responsive-activated	AT1G60690	loc_os10g28320	aldo/keto reductase family protein	NAD(P)-linked oxidoreductase superfamily protein	NAD(P)-linked oxidoreductase superfamily protein; FUNCTIONS IN: oxidoreductase activity, aldo-keto reductase activity; INVOLVED IN: oxidation reduction; LOCATED IN: plasma membrane, chloroplast envelope; EXPRESSED IN: 22 plant structures; EXPRESSED DURING: 13 growth stages; CONTAINS InterPro DOMAIN/s: Aldo/keto reductase (InterPro:IPR001395); BEST Arabidopsis thaliana protein match is: NAD(P)-lin…
cassava4.1_013579m.g	29.194	35.2075	107.542	65.2881	101.355	120.683	111.551	107.159	197.586	272.952	776.142	911.599	C2	hormone metabolism.auxin.induced-regulated-responsive-activated	AT5G19140	loc_os12g05050	AILP1	Aluminium induced protein with YGL and LRDR motifs	AILP1; FUNCTIONS IN: molecular_function unknown; INVOLVED IN: response to auxin stimulus, response to aluminum ion; LOCATED IN: plasma membrane; EXPRESSED IN: 23 plant structures; EXPRESSED DURING: 13 growth stages; BEST Arabidopsis thaliana protein match is: Aluminium induced protein with YGL and LRDR motifs (TAIR:AT5G43830.1); Has 1807 Blast hits to 1807 proteins in 277 species: Archae - 0; Bac…
cassava4.1_014428m.g	2.88335	4.75118	11.0557	6.38373	15.4923	27.6669	22.8308	29.0468	118.29	22.3168	577.823	557.743	C1	hormone metabolism.auxin.induced-regulated-responsive-activated	AT4G27450	loc_os03g58170	unknown protein	Aluminium induced protein with YGL and LRDR motifs	Aluminium induced protein with YGL and LRDR motifs; FUNCTIONS IN: molecular_function unknown; INVOLVED IN: biological_process unknown; LOCATED IN: cytosol, nucleus, plasma membrane; EXPRESSED IN: 25 plant structures; EXPRESSED DURING: 14 growth stages; BEST Arabidopsis thaliana protein match is: Aluminium induced protein with YGL and LRDR motifs (TAIR:AT3G15450.1); Has 30201 Blast hits to 17322 p…
cassava4.1_014539m.g	1.92224	2.19285	1.56343	0	0.545505	0.375569	0.600811	0.686917	0.873792	35.5081	1.47907	5.41292	C4	hormone metabolism.auxin.induced-regulated-responsive-activated	AT4G27450	loc_os03g53270	unknown protein	Aluminium induced protein with YGL and LRDR motifs	Aluminium induced protein with YGL and LRDR motifs; FUNCTIONS IN: molecular_function unknown; INVOLVED IN: biological_process unknown; LOCATED IN: cytosol, nucleus, plasma membrane; EXPRESSED IN: 25 plant structures; EXPRESSED DURING: 14 growth stages; BEST Arabidopsis thaliana protein match is: Aluminium induced protein with YGL and LRDR motifs (TAIR:AT3G15450.1); Has 30201 Blast hits to 17322 p…
cassava4.1_014697m.g	58.6282	63.2273	43.2177	81.6827	83.3532	66.726	85.5155	69.0843	51.226	82.6716	416.851	294.845	C1	hormone metabolism.auxin.induced-regulated-responsive-activated	AT3G22850	loc_os03g53270	unknown protein	Aluminium induced protein with YGL and LRDR motifs	Aluminium induced protein with YGL and LRDR motifs; FUNCTIONS IN: molecular_function unknown; INVOLVED IN: biological_process unknown; LOCATED IN: cytosol, nucleus, plasma membrane; EXPRESSED IN: 24 plant structures; EXPRESSED DURING: 15 growth stages; BEST Arabidopsis thaliana protein match is: Aluminium induced protein with YGL and LRDR motifs (TAIR:AT5G43830.1); Has 1324 Blast hits to 1324 pro…
cassava4.1_015159m.g	74.1263	114.272	139.481	236.053	263.261	292.192	262.154	253.472	281.142	161.006	1032.51	1159.11	C2	hormone metabolism.auxin.induced-regulated-responsive-activated	AT5G19140	loc_os12g05050	AILP1	Aluminium induced protein with YGL and LRDR motifs	AILP1; FUNCTIONS IN: molecular_function unknown; INVOLVED IN: response to auxin stimulus, response to aluminum ion; LOCATED IN: plasma membrane; EXPRESSED IN: 23 plant structures; EXPRESSED DURING: 13 growth stages; BEST Arabidopsis thaliana protein match is: Aluminium induced protein with YGL and LRDR motifs (TAIR:AT5G43830.1); Has 1807 Blast hits to 1807 proteins in 277 species: Archae - 0; Bac…
cassava4.1_017683m.g	1.8021	4.62936	4.2436	27.1308	19.7473	31.4226	40.4546	36.3085	55.595	71.8294	190.43	220.337	C2	hormone metabolism.auxin.induced-regulated-responsive-activated	AT5G50760	loc_os01g70050	auxin-responsive family protein	SAUR-like auxin-responsive protein family	SAUR-like auxin-responsive protein family ; CONTAINS InterPro DOMAIN/s: Auxin responsive SAUR protein (InterPro:IPR003676); BEST Arabidopsis thaliana protein match is: SAUR-like auxin-responsive protein family (TAIR:AT3G43120.1); Has 1807 Blast hits to 1807 proteins in 277 species: Archae - 0; Bacteria - 0; Metazoa - 736; Fungi - 347; Plants - 385; Viruses - 0; Other Eukaryotes - 339 (source: NCB…
cassava4.1_021650m.g	13.8161	18.3956	1.34008	6.81898	3.70943	0.751137	0.20027	0.785048	0.327672	33.7914	15.2837	10.4013	C4	hormone metabolism.auxin.induced-regulated-responsive-activated	AT1G60710	loc_os10g28320	ATB2; oxidoreductase	NAD(P)-linked oxidoreductase superfamily protein	ATB2; FUNCTIONS IN: oxidoreductase activity; INVOLVED IN: response to cadmium ion; EXPRESSED IN: 23 plant structures; EXPRESSED DURING: 14 growth stages; CONTAINS InterPro DOMAIN/s: Aldo/keto reductase (InterPro:IPR001395), Aldo/keto reductase subgroup (InterPro:IPR020471); BEST Arabidopsis thaliana protein match is: NAD(P)-linked oxidoreductase superfamily protein (TAIR:AT1G60730.1); Has 30719 B…
cassava4.1_026456m.g	81.2145	75.8971	42.8827	36.1261	25.2023	13.5205	6.00811	11.3832	7.42723	101.465	13.8046	15.4958	C5	hormone metabolism.auxin.induced-regulated-responsive-activated	AT3G25290	loc_os08g41290	auxin-responsive family protein	Auxin-responsive family protein	Auxin-responsive family protein; INVOLVED IN: multicellular organismal development; LOCATED IN: plasma membrane, membrane; EXPRESSED IN: 19 plant structures; EXPRESSED DURING: 9 growth stages; CONTAINS InterPro DOMAIN/s: Cytochrome b561, eukaryote (InterPro:IPR004877), Uncharacterised conserved protein UCP037471 (InterPro:IPR017214), Protein of unknown function DUF568, DOMON-like (InterPro:IPR007…
cassava4.1_031611m.g	5.52643	2.55833	8.59888	1.74102	2.07292	2.00303	2.50338	2.55141	6.22576	38.9415	84.1837	170.135	C2	hormone metabolism.auxin.induced-regulated-responsive-activated	AT2G14960	loc_os07g40290	GH3.1	Auxin-responsive GH3 family protein	GH3.1; CONTAINS InterPro DOMAIN/s: GH3 auxin-responsive promoter (InterPro:IPR004993); BEST Arabidopsis thaliana protein match is: Auxin-responsive GH3 family protein (TAIR:AT4G37390.1); Has 1628 Blast hits to 1412 proteins in 230 species: Archae - 1; Bacteria - 595; Metazoa - 55; Fungi - 2; Plants - 676; Viruses - 0; Other Eukaryotes - 299 (source: NCBI BLink).
cassava4.1_004294m.g	87.4618	77.4808	67.786	76.4597	58.369	41.4377	50.7685	40.7244	13.653	16.8957	7.27209	6.68654	C6	hormone metabolism.auxin.signal transduction	AT3G62980	loc_os04g32460	TIR1 (TRANSPORT INHIBITOR RESPONSE 1); auxin binding / protein binding / ubiquitin-protein ligase	F-box/RNI-like superfamily protein	TRANSPORT INHIBITOR RESPONSE 1 (TIR1); CONTAINS InterPro DOMAIN/s: F-box domain, cyclin-like (InterPro:IPR001810), F-box domain, Skp2-like (InterPro:IPR022364); BEST Arabidopsis thaliana protein match is: GRR1-like protein 1 (TAIR:AT4G03190.1); Has 30201 Blast hits to 17322 proteins in 780 species: Archae - 12; Bacteria - 1396; Metazoa - 17338; Fungi - 3422; Plants - 5037; Viruses - 0; Other Euka…
cassava4.1_029078m.g	0.12014	0	0	0.145085	0.327303	0.12519	0.20027	0.098131	0.109224	34.6046	1.47907	0.742949	C4	hormone metabolism.auxin.signal transduction	AT5G57090	loc_os06g44970	EIR1 (ETHYLENE INSENSITIVE ROOT 1); auxin efflux transmembrane transporter/ auxin:hydrogen symporter/ transporter	Auxin efflux carrier family protein	ETHYLENE INSENSITIVE ROOT 1 (EIR1); CONTAINS InterPro DOMAIN/s: Auxin efflux carrier, subgroup (InterPro:IPR014024), Auxin efflux carrier (InterPro:IPR004776); BEST Arabidopsis thaliana protein match is: Auxin efflux carrier family protein (TAIR:AT2G01420.2); Has 30201 Blast hits to 17322 proteins in 780 species: Archae - 12; Bacteria - 1396; Metazoa - 17338; Fungi - 3422; Plants - 5037; Viruses …
cassava4.1_004670m.g	150.295	94.2927	111.785	43.9607	51.3866	29.4195	34.9472	44.8459	19.1142	423.839	68.2837	75.144	C4	hormone metabolism.brassinosteroid.synthesis-degradation.sterols.DWF1	AT3G19820	loc_os10g25780	DWF1 (DWARF 1); calmodulin binding / catalytic	cell elongation protein / DWARF1 / DIMINUTO (DIM)	DWARF 1 (DWF1); FUNCTIONS IN: calmodulin binding, catalytic activity; INVOLVED IN: response to light stimulus, steroid biosynthetic process, unidimensional cell growth, brassinosteroid biosynthetic process; LOCATED IN: integral to membrane, plasma membrane, vacuole, membrane; EXPRESSED IN: 25 plant structures; EXPRESSED DURING: 14 growth stages; CONTAINS InterPro DOMAIN/s: FAD-linked oxidase, FAD…
cassava4.1_007981m.g	76.4089	82.7193	43.9995	85.6	127.757	30.9218	96.7306	98.131	34.7332	115.379	57.6837	44.3647	C8	hormone metabolism.brassinosteroid.synthesis-degradation.sterols.DWF5	AT1G50430	loc_os02g26650	DWF5 (DWARF 5); sterol delta7 reductase	Ergosterol biosynthesis ERG4/ERG24 family	DWARF 5 (DWF5); FUNCTIONS IN: sterol delta7 reductase activity; INVOLVED IN: sterol biosynthetic process, unidimensional cell growth, brassinosteroid biosynthetic process; LOCATED IN: integral to endoplasmic reticulum membrane, plasma membrane; EXPRESSED IN: 22 plant structures; EXPRESSED DURING: 13 growth stages; CONTAINS InterPro DOMAIN/s: Sterol reductase, conserved site (InterPro:IPR018083), …
cassava4.1_013734m.g	146.811	124.14	128.536	164.236	97.0999	102.781	78.1055	58.6824	41.0682	84.7496	28.1023	14.0099	C6	hormone metabolism.brassinosteroid.synthesis-degradation.sterols.DWF7	AT3G02580	loc_os01g04260	STE1 (STEROL 1); C-5 sterol desaturase	sterol 1	sterol 1 (STE1); FUNCTIONS IN: C-5 sterol desaturase activity; INVOLVED IN: sterol biosynthetic process, unidimensional cell growth, brassinosteroid biosynthetic process; LOCATED IN: endoplasmic reticulum; EXPRESSED IN: 23 plant structures; EXPRESSED DURING: 13 growth stages; CONTAINS InterPro DOMAIN/s: Fatty acid hydroxylase (InterPro:IPR006694); BEST Arabidopsis thaliana protein match is: Fatty…
cassava4.1_005294m.g	42.6496	30.9436	29.5935	24.2292	16.9107	41.4377	30.341	34.2477	238.436	53.0363	14.2977	13.5854	C10	hormone metabolism.brassinosteroid.synthesis-degradation.sterols.other	AT1G58440	loc_os03g12910	XF1; squalene monooxygenase	FAD/NAD(P)-binding oxidoreductase family protein	XF1; FUNCTIONS IN: squalene monooxygenase activity; INVOLVED IN: response to water deprivation, sterol biosynthetic process; LOCATED IN: endomembrane system, integral to membrane; EXPRESSED IN: 29 plant structures; EXPRESSED DURING: 13 growth stages; CONTAINS InterPro DOMAIN/s: Squalene epoxidase (InterPro:IPR013698); BEST Arabidopsis thaliana protein match is: squalene epoxidase 2 (TAIR:AT2G2283…
cassava4.1_010340m.g	31.1162	15.9591	10.274	3.7722	3.27303	2.75417	2.0027	2.35515	1.31069	60.9872	3.69767	2.54725	C5	hormone metabolism.brassinosteroid.synthesis-degradation.sterols.SMT2	AT1G20330	loc_os03g04340	SMT2 (STEROL METHYLTRANSFERASE 2); S-adenosylmethionine-dependent methyltransferase	sterol methyltransferase 2	sterol methyltransferase 2 (SMT2); FUNCTIONS IN: S-adenosylmethionine-dependent methyltransferase activity; INVOLVED IN: xylem and phloem pattern formation, negative regulation of DNA endoreduplication, multidimensional cell growth, sterol biosynthetic process, pattern specification process; LOCATED IN: endoplasmic reticulum; EXPRESSED IN: 30 plant structures; EXPRESSED DURING: 14 growth stages; …
cassava4.1_010995m.g	30.5155	14.3754	16.9744	2.75661	2.18202	2.25341	1.90257	2.64954	3.71361	63.246	20.707	10.4013	C4	hormone metabolism.brassinosteroid.synthesis-degradation.sterols.SMT2	AT5G13710	loc_os07g10600	SMT1 (STEROL METHYLTRANSFERASE 1); sterol 24-C-methyltransferase	sterol methyltransferase 1	sterol methyltransferase 1 (SMT1); FUNCTIONS IN: sterol 24-C-methyltransferase activity; INVOLVED IN: sterol biosynthetic process, embryo development ending in seed dormancy; LOCATED IN: vacuole; EXPRESSED IN: 23 plant structures; EXPRESSED DURING: 13 growth stages; CONTAINS InterPro DOMAIN/s: Sterol methyltransferase C-terminal (InterPro:IPR013705), Methyltransferase type 11 (InterPro:IPR013216)…
cassava4.1_000387m.g	1.08126	1.82738	5.47201	0.435254	0.763707	3.00455	0.901217	1.2757	1.63836	10.9325	20.5837	37.0413	C2	hormone metabolism.cytokinin.signal transduction	AT2G17820	loc_os06g08450	ATHK1 (histidine kinase 1); histidine phosphotransfer kinase/ osmosensor/ protein histidine kinase	histidine kinase 1	histidine kinase 1 (HK1); FUNCTIONS IN: osmosensor activity, protein histidine kinase activity, histidine phosphotransfer kinase activity; INVOLVED IN: response to water deprivation, seed maturation, response to osmotic stress; LOCATED IN: membrane; EXPRESSED IN: 19 plant structures; EXPRESSED DURING: 12 growth stages; CONTAINS InterPro DOMAIN/s: Signal transduction histidine kinase, homodimeric …
cassava4.1_000780m.g	63.9144	76.1407	67.1159	58.6142	105.501	78.9946	98.3328	119.327	152.149	70.4741	185.253	212.165	C2	hormone metabolism.cytokinin.signal transduction	AT1G27320	loc_os01g69920	AHK3 (ARABIDOPSIS HISTIDINE KINASE 3); cytokinin receptor/ osmosensor/ protein histidine kinase	histidine kinase 3	histidine kinase 3 (HK3); CONTAINS InterPro DOMAIN/s: Signal transduction histidine kinase, homodimeric (InterPro:IPR009082), CHASE (InterPro:IPR006189), Signal transduction histidine kinase, core (InterPro:IPR005467), ATPase-like, ATP-binding domain (InterPro:IPR003594), CheY-like (InterPro:IPR011006), Signal transduction response regulator, receiver domain (InterPro:IPR001789), Signal transduct…
cassava4.1_024671m.g	0.600699	0.852776	0.89339	0.580339	0.763707	1.2519	1.40189	1.86449	4.80585	95.6822	5.66977	16.0265	C4	hormone metabolism.ethylene.induced-regulated-responsive-activated	AT3G24500	loc_os06g39240	MBF1C (MULTIPROTEIN BRIDGING FACTOR 1C); DNA binding / transcription coactivator/ transcription factor	multiprotein bridging factor 1C	multiprotein bridging factor 1C (MBF1C); CONTAINS InterPro DOMAIN/s: Lambda repressor-like, DNA-binding (InterPro:IPR010982), Multiprotein bridging factor 1, N-terminal (InterPro:IPR013729), Helix-turn-helix type 3 (InterPro:IPR001387); BEST Arabidopsis thaliana protein match is: multiprotein bridging factor 1B (TAIR:AT3G58680.1); Has 715 Blast hits to 715 proteins in 278 species: Archae - 65; Ba…
cassava4.1_002150m.g	10.9327	9.13689	16.1927	8.12475	7.96437	13.2701	9.1123	15.4066	141.227	78.0636	155.795	121.313	C1	hormone metabolism.ethylene.signal transduction	AT3G23150	loc_os04g08740	ETR2 (ethylene response 2); ethylene binding / glycogen synthase kinase 3/ protein histidine kinase/ receptor	Signal transduction histidine kinase, hybrid-type, ethylene sensor	ethylene response 2 (ETR2); FUNCTIONS IN: ethylene binding, protein histidine kinase activity, receptor activity, glycogen synthase kinase 3 activity; INVOLVED IN: negative regulation of ethylene mediated signaling pathway; LOCATED IN: endomembrane system, endoplasmic reticulum membrane, membrane; EXPRESSED IN: 22 plant structures; EXPRESSED DURING: 7 growth stages; CONTAINS InterPro DOMAIN/s: Si…
cassava4.1_002152m.g	14.7772	13.6444	18.7612	3.91729	3.92764	7.26099	5.90798	10.1075	74.6	27.2861	75.4325	35.8738	C1	hormone metabolism.ethylene.signal transduction	AT3G23150	loc_os04g08740	ETR2 (ethylene response 2); ethylene binding / glycogen synthase kinase 3/ protein histidine kinase/ receptor	Signal transduction histidine kinase, hybrid-type, ethylene sensor	ethylene response 2 (ETR2); FUNCTIONS IN: ethylene binding, protein histidine kinase activity, receptor activity, glycogen synthase kinase 3 activity; INVOLVED IN: negative regulation of ethylene mediated signaling pathway; LOCATED IN: endomembrane system, endoplasmic reticulum membrane, membrane; EXPRESSED IN: 22 plant structures; EXPRESSED DURING: 7 growth stages; CONTAINS InterPro DOMAIN/s: Si…
cassava4.1_002375m.g	51.54	54.8213	56.0602	54.4068	63.9332	52.9552	57.778	69.2805	99.0661	98.0313	306.784	292.191	C1	hormone metabolism.ethylene.signal transduction	AT1G66340	loc_os03g49500	ETR1 (ETHYLENE RESPONSE 1); ethylene binding / protein histidine kinase/ two-component response regulator	Signal transduction histidine kinase, hybrid-type, ethylene sensor	ETHYLENE RESPONSE 1 (ETR1); CONTAINS InterPro DOMAIN/s: Signal transduction histidine kinase, homodimeric (InterPro:IPR009082), Signal transduction histidine kinase, core (InterPro:IPR005467), Signal transduction histidine kinase, hybrid-type, ethylene sensor (InterPro:IPR014525), ATPase-like, ATP-binding domain (InterPro:IPR003594), CheY-like (InterPro:IPR011006), Signal transduction response re…
cassava4.1_015856m.g	1.08126	0.609126	1.22841	1.30576	0.872808	0.250379	1.20162	1.37383	3.05827	7.67987	48.9325	35.8738	C1	hormone metabolism.ethylene.signal transduction	AT3G23240	loc_os03g64260	ERF1 (ETHYLENE RESPONSE FACTOR 1); DNA binding / transcription activator/ transcription factor	ethylene response factor 1	ethylene response factor 1 (ERF1); CONTAINS InterPro DOMAIN/s: DNA-binding, integrase-type (InterPro:IPR016177), Pathogenesis-related transcriptional factor/ERF, DNA-binding (InterPro:IPR001471); BEST Arabidopsis thaliana protein match is: ethylene-responsive element binding factor 15 (TAIR:AT2G31230.1); Has 5944 Blast hits to 5682 proteins in 249 species: Archae - 0; Bacteria - 0; Metazoa - 0; F…
cassava4.1_017103m.g	0.840979	1.82738	0.89339	0.435254	2.18202	1.37709	2.60352	2.15888	7.64568	8.49303	36.607	20.9087	C1	hormone metabolism.ethylene.signal transduction	AT3G23240	loc_os01g54890	ERF1 (ETHYLENE RESPONSE FACTOR 1); DNA binding / transcription activator/ transcription factor	ethylene response factor 1	ethylene response factor 1 (ERF1); CONTAINS InterPro DOMAIN/s: DNA-binding, integrase-type (InterPro:IPR016177), Pathogenesis-related transcriptional factor/ERF, DNA-binding (InterPro:IPR001471); BEST Arabidopsis thaliana protein match is: ethylene-responsive element binding factor 15 (TAIR:AT2G31230.1); Has 5944 Blast hits to 5682 proteins in 249 species: Archae - 0; Bacteria - 0; Metazoa - 0; F…
cassava4.1_022781m.g	0	0	0.223347	0	0.218202	0	0.300406	0.196262	1.52914	1.98773	31.6767	29.5057	C1	hormone metabolism.ethylene.signal transduction	AT3G23240	loc_os03g64260	ERF1 (ETHYLENE RESPONSE FACTOR 1); DNA binding / transcription activator/ transcription factor	ethylene response factor 1	ethylene response factor 1 (ERF1); CONTAINS InterPro DOMAIN/s: DNA-binding, integrase-type (InterPro:IPR016177), Pathogenesis-related transcriptional factor/ERF, DNA-binding (InterPro:IPR001471); BEST Arabidopsis thaliana protein match is: ethylene-responsive element binding factor 15 (TAIR:AT2G31230.1); Has 5944 Blast hits to 5682 proteins in 249 species: Archae - 0; Bacteria - 0; Metazoa - 0; F…
cassava4.1_009771m.g	0.360419	0.730951	3.23854	0.435254	1.20011	2.87936	0.20027	0.588786	1.41991	7.49917	7.5186	37.6781	C2	hormone metabolism.ethylene.synthesis-degradation	AT1G17020	loc_os01g24980	SRG1 (SENESCENCE-RELATED GENE 1); oxidoreductase, acting on diphenols and related substances as donors, oxygen as acceptor / oxidoreductase, acting on paired donors, with incorporation or reduction of molecular oxygen, 2-oxoglutarate as one donor, and inc	senescence-related gene 1	senescence-related gene 1 (SRG1); CONTAINS InterPro DOMAIN/s: Oxoglutarate/iron-dependent oxygenase (InterPro:IPR005123); BEST Arabidopsis thaliana protein match is: 2-oxoglutarate (2OG) and Fe(II)-dependent oxygenase superfamily protein (TAIR:AT1G17010.1); Has 8560 Blast hits to 8517 proteins in 996 species: Archae - 0; Bacteria - 1133; Metazoa - 115; Fungi - 988; Plants - 4970; Viruses - 0; Oth…
cassava4.1_010188m.g	32.9183	31.1872	34.9539	52.2305	35.8942	18.0273	31.7429	18.1542	4.47818	2.25879	2.83488	2.44112	C8	hormone metabolism.ethylene.synthesis-degradation	AT3G21420	loc_os01g70930	oxidoreductase, 2OG-Fe(II) oxygenase family protein	2-oxoglutarate (2OG) and Fe(II)-dependent oxygenase superfamily protein	2-oxoglutarate (2OG) and Fe(II)-dependent oxygenase superfamily protein; FUNCTIONS IN: oxidoreductase activity; INVOLVED IN: metabolic process; LOCATED IN: cellular_component unknown; EXPRESSED IN: 16 plant structures; EXPRESSED DURING: 8 growth stages; CONTAINS InterPro DOMAIN/s: Oxoglutarate/iron-dependent oxygenase (InterPro:IPR005123); BEST Arabidopsis thaliana protein match is: senescence-re…
cassava4.1_010212m.g	2764.66	3742.22	3949.23	884.001	379.453	2862.84	2184.45	2648.36	3105.56	571.292	345.856	215.455	C7	hormone metabolism.ethylene.synthesis-degradation	AT3G51240	loc_os04g56700	F3H (FLAVANONE 3-HYDROXYLASE); naringenin 3-dioxygenase	flavanone 3-hydroxylase	flavanone 3-hydroxylase (F3H); FUNCTIONS IN: naringenin 3-dioxygenase activity; INVOLVED IN: response to UV-B, response to sucrose stimulus, flavonoid biosynthetic process; LOCATED IN: cellular_component unknown; EXPRESSED IN: 20 plant structures; EXPRESSED DURING: 13 growth stages; CONTAINS InterPro DOMAIN/s: Oxoglutarate/iron-dependent oxygenase (InterPro:IPR005123); BEST Arabidopsis thaliana p…
cassava4.1_010222m.g	85.7798	60.9126	56.2836	35.2556	7.96437	3.00455	16.9228	7.45796	6.66266	22.3168	37.7163	21.9701	C6	hormone metabolism.ethylene.synthesis-degradation	AT3G21420	loc_os01g70930	oxidoreductase, 2OG-Fe(II) oxygenase family protein	2-oxoglutarate (2OG) and Fe(II)-dependent oxygenase superfamily protein	2-oxoglutarate (2OG) and Fe(II)-dependent oxygenase superfamily protein; FUNCTIONS IN: oxidoreductase activity; INVOLVED IN: metabolic process; LOCATED IN: cellular_component unknown; EXPRESSED IN: 16 plant structures; EXPRESSED DURING: 8 growth stages; CONTAINS InterPro DOMAIN/s: Oxoglutarate/iron-dependent oxygenase (InterPro:IPR005123); BEST Arabidopsis thaliana protein match is: senescence-re…
cassava4.1_010251m.g	0	0.121825	0.670042	0.145085	1.30921	1.00152	1.60216	1.5701	1.74758	9.21585	31.4302	17.0878	C1	hormone metabolism.ethylene.synthesis-degradation	AT1G17020	loc_os01g25010	SRG1 (SENESCENCE-RELATED GENE 1); oxidoreductase, acting on diphenols and related substances as donors, oxygen as acceptor / oxidoreductase, acting on paired donors, with incorporation or reduction of molecular oxygen, 2-oxoglutarate as one donor, and inc	senescence-related gene 1	senescence-related gene 1 (SRG1); CONTAINS InterPro DOMAIN/s: Oxoglutarate/iron-dependent oxygenase (InterPro:IPR005123); BEST Arabidopsis thaliana protein match is: 2-oxoglutarate (2OG) and Fe(II)-dependent oxygenase superfamily protein (TAIR:AT1G17010.1); Has 8560 Blast hits to 8517 proteins in 996 species: Archae - 0; Bacteria - 1133; Metazoa - 115; Fungi - 988; Plants - 4970; Viruses - 0; Oth…
cassava4.1_010346m.g	12.9751	12.9135	19.0962	34.24	36.767	158.991	105.643	140.426	2241.38	16.444	23.2953	41.2867	C10	hormone metabolism.ethylene.synthesis-degradation	AT1G03400	loc_os06g14400	2-oxoglutarate-dependent dioxygenase, putative	2-oxoglutarate (2OG) and Fe(II)-dependent oxygenase superfamily protein	2-oxoglutarate (2OG) and Fe(II)-dependent oxygenase superfamily protein; CONTAINS InterPro DOMAIN/s: Oxoglutarate/iron-dependent oxygenase (InterPro:IPR005123); BEST Arabidopsis thaliana protein match is: 2-oxoglutarate (2OG) and Fe(II)-dependent oxygenase superfamily protein (TAIR:AT1G03410.1); Has 8186 Blast hits to 8162 proteins in 1002 species: Archae - 0; Bacteria - 1123; Metazoa - 116; Fung…
cassava4.1_010376m.g	0.12014	0.487301	0	0	2.40022	1.50227	1.60216	0.686917	0.436896	274.126	20.8302	24.0928	C4	hormone metabolism.ethylene.synthesis-degradation	AT1G55290	loc_os03g03034	oxidoreductase, 2OG-Fe(II) oxygenase family protein	2-oxoglutarate (2OG) and Fe(II)-dependent oxygenase superfamily protein	2-oxoglutarate (2OG) and Fe(II)-dependent oxygenase superfamily protein; CONTAINS InterPro DOMAIN/s: Oxoglutarate/iron-dependent oxygenase (InterPro:IPR005123); BEST Arabidopsis thaliana protein match is: 2-oxoglutarate (2OG) and Fe(II)-dependent oxygenase superfamily protein (TAIR:AT3G13610.1); Has 8871 Blast hits to 8831 proteins in 1013 species: Archae - 0; Bacteria - 1149; Metazoa - 118; Fung…
cassava4.1_010623m.g	0.24028	0.852776	1.11674	6.52881	31.4211	39.3095	11.2151	25.9066	13.3253	28.8221	43.6325	41.7113	C2	hormone metabolism.ethylene.synthesis-degradation	AT1G17020	loc_os10g40880	SRG1 (SENESCENCE-RELATED GENE 1); oxidoreductase, acting on diphenols and related substances as donors, oxygen as acceptor / oxidoreductase, acting on paired donors, with incorporation or reduction of molecular oxygen, 2-oxoglutarate as one donor, and inc	senescence-related gene 1	senescence-related gene 1 (SRG1); CONTAINS InterPro DOMAIN/s: Oxoglutarate/iron-dependent oxygenase (InterPro:IPR005123); BEST Arabidopsis thaliana protein match is: 2-oxoglutarate (2OG) and Fe(II)-dependent oxygenase superfamily protein (TAIR:AT1G17010.1); Has 8560 Blast hits to 8517 proteins in 996 species: Archae - 0; Bacteria - 1133; Metazoa - 115; Fungi - 988; Plants - 4970; Viruses - 0; Oth…
cassava4.1_010744m.g	23.0668	27.6543	43.7761	38.8827	69.0609	79.8709	74.9011	94.5983	184.807	16.8957	59.4093	57.6316	C10	hormone metabolism.ethylene.synthesis-degradation	AT1G49390	loc_os06g08032	oxidoreductase, 2OG-Fe(II) oxygenase family protein	2-oxoglutarate (2OG) and Fe(II)-dependent oxygenase superfamily protein	2-oxoglutarate (2OG) and Fe(II)-dependent oxygenase superfamily protein; FUNCTIONS IN: oxidoreductase activity, acting on paired donors, with incorporation or reduction of molecular oxygen, 2-oxoglutarate as one donor, and incorporation of one atom each of oxygen into both donors, oxidoreductase activity; INVOLVED IN: flavonoid biosynthetic process; LOCATED IN: cellular_component unknown; EXPRESS…
cassava4.1_010809m.g	1688.93	2837.19	2081.49	283.931	100.264	547.204	473.039	461.412	348.643	429.531	97.9883	79.1772	C6	hormone metabolism.ethylene.synthesis-degradation	AT4G22880	loc_os01g27490	LDOX (LEUCOANTHOCYANIDIN DIOXYGENASE); leucocyanidin oxygenase	leucoanthocyanidin dioxygenase	leucoanthocyanidin dioxygenase (LDOX); CONTAINS InterPro DOMAIN/s: Oxoglutarate/iron-dependent oxygenase (InterPro:IPR005123); BEST Arabidopsis thaliana protein match is: flavonol synthase 1 (TAIR:AT5G08640.2); Has 8356 Blast hits to 8311 proteins in 977 species: Archae - 0; Bacteria - 1058; Metazoa - 85; Fungi - 889; Plants - 4934; Viruses - 0; Other Eukaryotes - 1390 (source: NCBI BLink).
cassava4.1_011298m.g	3.48405	1.09643	3.46189	19.7315	10.5828	27.1661	11.9161	11.1869	9.06559	6.5053	40.3046	8.59698	C1	hormone metabolism.ethylene.synthesis-degradation	AT1G30040	loc_os01g55240	ATGA2OX2 (GIBBERELLIN 2-OXIDASE); gibberellin 2-beta-dioxygenase	gibberellin 2-oxidase	gibberellin 2-oxidase (GA2OX2); CONTAINS InterPro DOMAIN/s: Isopenicillin N synthase (InterPro:IPR002283), Oxoglutarate/iron-dependent oxygenase (InterPro:IPR005123); BEST Arabidopsis thaliana protein match is: gibberellin 2-oxidase 3 (TAIR:AT2G34555.1); Has 8540 Blast hits to 8490 proteins in 994 species: Archae - 0; Bacteria - 1137; Metazoa - 84; Fungi - 1033; Plants - 4909; Viruses - 0; Other …
cassava4.1_011509m.g	476.114	370.958	374.442	197.46	147.395	165	130.877	106.668	37.9007	9.75795	4.31395	4.24542	C6	hormone metabolism.ethylene.synthesis-degradation	AT5G08640	loc_os02g52840	FLS (FLAVONOL SYNTHASE); flavonol synthase	flavonol synthase 1	flavonol synthase 1 (FLS1); CONTAINS InterPro DOMAIN/s: Oxoglutarate/iron-dependent oxygenase (InterPro:IPR005123); BEST Arabidopsis thaliana protein match is: flavonol synthase 3 (TAIR:AT5G63590.1); Has 8476 Blast hits to 8432 proteins in 992 species: Archae - 0; Bacteria - 1104; Metazoa - 92; Fungi - 925; Plants - 4948; Viruses - 0; Other Eukaryotes - 1407 (source: NCBI BLink).
cassava4.1_011871m.g	1.92224	2.4365	0.446695	16.3946	11.0192	0.500758	1.90257	5.39721	0.327672	28.0089	180.446	124.815	C1	hormone metabolism.ethylene.synthesis-degradation	AT1G78440	loc_os01g55240	ATGA2OX1 (gibberellin 2-oxidase 1); gibberellin 2-beta-dioxygenase	Arabidopsis thaliana gibberellin 2-oxidase 1	Arabidopsis thaliana gibberellin 2-oxidase 1 (ATGA2OX1); CONTAINS InterPro DOMAIN/s: Isopenicillin N synthase (InterPro:IPR002283), Oxoglutarate/iron-dependent oxygenase (InterPro:IPR005123); BEST Arabidopsis thaliana protein match is: gibberellin 2-oxidase (TAIR:AT1G30040.1); Has 8410 Blast hits to 8364 proteins in 975 species: Archae - 0; Bacteria - 1063; Metazoa - 88; Fungi - 964; Plants - 489…
cassava4.1_012045m.g	345.402	663.46	435.863	1460.13	951.361	870.193	948.781	806.343	386.107	75.4434	288.295	152.092	C8	hormone metabolism.ethylene.synthesis-degradation	AT1G05010	loc_os09g27750	EFE (ETHYLENE-FORMING ENZYME); 1-aminocyclopropane-1-carboxylate oxidase	ethylene-forming enzyme	ethylene-forming enzyme (EFE); FUNCTIONS IN: 1-aminocyclopropane-1-carboxylate oxidase activity; INVOLVED IN: response to fungus, ethylene biosynthetic process; EXPRESSED IN: 22 plant structures; EXPRESSED DURING: 13 growth stages; CONTAINS InterPro DOMAIN/s: Oxoglutarate/iron-dependent oxygenase (InterPro:IPR005123); BEST Arabidopsis thaliana protein match is: 2-oxoglutarate (2OG) and Fe(II)-dep…
cassava4.1_012282m.g	24.028	53.1158	180.241	379.687	200.637	121.434	116.257	102.939	41.2867	7.22811	52.3837	62.0893	C8	hormone metabolism.ethylene.synthesis-degradation	AT1G05010	loc_os09g27750	EFE (ETHYLENE-FORMING ENZYME); 1-aminocyclopropane-1-carboxylate oxidase	ethylene-forming enzyme	ethylene-forming enzyme (EFE); FUNCTIONS IN: 1-aminocyclopropane-1-carboxylate oxidase activity; INVOLVED IN: response to fungus, ethylene biosynthetic process; EXPRESSED IN: 22 plant structures; EXPRESSED DURING: 13 growth stages; CONTAINS InterPro DOMAIN/s: Oxoglutarate/iron-dependent oxygenase (InterPro:IPR005123); BEST Arabidopsis thaliana protein match is: 2-oxoglutarate (2OG) and Fe(II)-dep…
cassava4.1_012494m.g	1.32154	1.4619	1.78678	3.91729	3.60033	3.6305	1.90257	1.86449	1.74758	265.272	1654.71	1418.08	C1	hormone metabolism.ethylene.synthesis-degradation	AT2G19590	loc_os06g37590	ACO1 (ACC OXIDASE 1); 1-aminocyclopropane-1-carboxylate oxidase	ACC oxidase 1	ACC oxidase 1 (ACO1); CONTAINS InterPro DOMAIN/s: Oxoglutarate/iron-dependent oxygenase (InterPro:IPR005123); BEST Arabidopsis thaliana protein match is: 2-oxoglutarate (2OG) and Fe(II)-dependent oxygenase superfamily protein (TAIR:AT1G12010.1); Has 7815 Blast hits to 7777 proteins in 927 species: Archae - 0; Bacteria - 960; Metazoa - 67; Fungi - 764; Plants - 4878; Viruses - 0; Other Eukaryotes …
cassava4.1_012731m.g	6.48755	8.64959	13.6242	3.48203	4.90955	4.63201	4.10554	5.39721	35.8255	9.75795	25.7605	21.8639	C10	hormone metabolism.ethylene.synthesis-degradation	AT1G14130	loc_os04g39980	2-oxoglutarate-dependent dioxygenase, putative	2-oxoglutarate (2OG) and Fe(II)-dependent oxygenase superfamily protein	2-oxoglutarate (2OG) and Fe(II)-dependent oxygenase superfamily protein; FUNCTIONS IN: oxidoreductase activity, acting on paired donors, with incorporation or reduction of molecular oxygen, 2-oxoglutarate as one donor, and incorporation of one atom each of oxygen into both donors, oxidoreductase activity; INVOLVED IN: biological_process unknown; LOCATED IN: nucleus; EXPRESSED IN: 23 plant structu…
cassava4.1_018157m.g	0.12014	0.24365	0.111674	0.870508	0.436404	0	1.7023	1.96262	31.6749	1.44562	10.7233	11.5688	C10	hormone metabolism.ethylene.synthesis-degradation	AT1G06620	loc_os04g10350	2-oxoglutarate-dependent dioxygenase, putative	2-oxoglutarate (2OG) and Fe(II)-dependent oxygenase superfamily protein	2-oxoglutarate (2OG) and Fe(II)-dependent oxygenase superfamily protein; CONTAINS InterPro DOMAIN/s: Oxoglutarate/iron-dependent oxygenase (InterPro:IPR005123); BEST Arabidopsis thaliana protein match is: 2-oxoglutarate (2OG) and Fe(II)-dependent oxygenase superfamily protein (TAIR:AT3G61400.1); Has 8339 Blast hits to 8299 proteins in 1003 species: Archae - 0; Bacteria - 1128; Metazoa - 122; Fung…
cassava4.1_018713m.g	32.678	39.715	43.1061	133.333	115.429	57.5872	138.487	115.697	23.4831	0.180703	0.246512	0.212271	C8	hormone metabolism.ethylene.synthesis-degradation	AT4G21200	loc_os02g41954	GA2OX8 (GIBBERELLIN 2-OXIDASE 8); gibberellin 2-beta-dioxygenase	gibberellin 2-oxidase 8	gibberellin 2-oxidase 8 (GA2OX8); CONTAINS InterPro DOMAIN/s: Oxoglutarate/iron-dependent oxygenase (InterPro:IPR005123); BEST Arabidopsis thaliana protein match is: gibberellin 2-oxidase 7 (TAIR:AT1G50960.1); Has 8586 Blast hits to 8547 proteins in 1007 species: Archae - 0; Bacteria - 1133; Metazoa - 115; Fungi - 1020; Plants - 4926; Viruses - 0; Other Eukaryotes - 1392 (source: NCBI BLink).
cassava4.1_022696m.g	95.8716	44.2225	131.328	30.3227	22.1475	145.595	40.2544	34.8365	51.1168	0.63246	0.739535	1.06136	C7	hormone metabolism.ethylene.synthesis-degradation	AT1G06620	loc_os03g48430	2-oxoglutarate-dependent dioxygenase, putative	2-oxoglutarate (2OG) and Fe(II)-dependent oxygenase superfamily protein	2-oxoglutarate (2OG) and Fe(II)-dependent oxygenase superfamily protein; CONTAINS InterPro DOMAIN/s: Oxoglutarate/iron-dependent oxygenase (InterPro:IPR005123); BEST Arabidopsis thaliana protein match is: 2-oxoglutarate (2OG) and Fe(II)-dependent oxygenase superfamily protein (TAIR:AT3G61400.1); Has 8339 Blast hits to 8299 proteins in 1003 species: Archae - 0; Bacteria - 1128; Metazoa - 122; Fung…
cassava4.1_023352m.g	3.00349	10.477	1.11674	78.9261	55.5324	13.7709	58.0784	52.8926	15.1821	2.07808	2.09535	3.92702	C8	hormone metabolism.ethylene.synthesis-degradation	AT1G06620	loc_os03g48430	2-oxoglutarate-dependent dioxygenase, putative	2-oxoglutarate (2OG) and Fe(II)-dependent oxygenase superfamily protein	2-oxoglutarate (2OG) and Fe(II)-dependent oxygenase superfamily protein; CONTAINS InterPro DOMAIN/s: Oxoglutarate/iron-dependent oxygenase (InterPro:IPR005123); BEST Arabidopsis thaliana protein match is: 2-oxoglutarate (2OG) and Fe(II)-dependent oxygenase superfamily protein (TAIR:AT3G61400.1); Has 8339 Blast hits to 8299 proteins in 1003 species: Archae - 0; Bacteria - 1128; Metazoa - 122; Fung…
cassava4.1_028540m.g	0	0.121825	0	0	0	0.12519	0	0	0.109224	55.3854	1.60233	0.318407	C4	hormone metabolism.ethylene.synthesis-degradation	AT1G77330	loc_os05g05680	1-aminocyclopropane-1-carboxylate oxidase, putative / ACC oxidase, putative	2-oxoglutarate (2OG) and Fe(II)-dependent oxygenase superfamily protein	2-oxoglutarate (2OG) and Fe(II)-dependent oxygenase superfamily protein; CONTAINS InterPro DOMAIN/s: Oxoglutarate/iron-dependent oxygenase (InterPro:IPR005123); BEST Arabidopsis thaliana protein match is: ACC oxidase 2 (TAIR:AT1G62380.1); Has 8581 Blast hits to 8541 proteins in 996 species: Archae - 0; Bacteria - 1106; Metazoa - 118; Fungi - 1011; Plants - 4940; Viruses - 0; Other Eukaryotes - 14…
cassava4.1_028703m.g	0.24028	0.24365	0	2.17627	0.981909	0.250379	0.20027	0.392524	0	7.58952	70.0093	17.4062	C1	hormone metabolism.ethylene.synthesis-degradation	AT1G30040	loc_os01g55240	ATGA2OX2 (GIBBERELLIN 2-OXIDASE); gibberellin 2-beta-dioxygenase	gibberellin 2-oxidase	gibberellin 2-oxidase (GA2OX2); CONTAINS InterPro DOMAIN/s: Isopenicillin N synthase (InterPro:IPR002283), Oxoglutarate/iron-dependent oxygenase (InterPro:IPR005123); BEST Arabidopsis thaliana protein match is: gibberellin 2-oxidase 3 (TAIR:AT2G34555.1); Has 8540 Blast hits to 8490 proteins in 994 species: Archae - 0; Bacteria - 1137; Metazoa - 84; Fungi - 1033; Plants - 4909; Viruses - 0; Other …
cassava4.1_030526m.g	0	0	0	0.290169	0.109101	0	0	0.098131	0.109224	103.994	4.31395	2.86566	C4	hormone metabolism.ethylene.synthesis-degradation	AT3G13610	loc_os03g48430	oxidoreductase, 2OG-Fe(II) oxygenase family protein	2-oxoglutarate (2OG) and Fe(II)-dependent oxygenase superfamily protein	2-oxoglutarate (2OG) and Fe(II)-dependent oxygenase superfamily protein; CONTAINS InterPro DOMAIN/s: Oxoglutarate/iron-dependent oxygenase (InterPro:IPR005123); BEST Arabidopsis thaliana protein match is: 2-oxoglutarate (2OG) and Fe(II)-dependent oxygenase superfamily protein (TAIR:AT1G55290.1); Has 8779 Blast hits to 8731 proteins in 1013 species: Archae - 0; Bacteria - 1145; Metazoa - 121; Fung…
cassava4.1_032738m.g	0.24028	0	0	0	0	0.12519	0	0.098131	0	9.39655	75.3093	34.4941	C1	hormone metabolism.ethylene.synthesis-degradation	AT1G17020	loc_os01g25010	SRG1 (SENESCENCE-RELATED GENE 1); oxidoreductase, acting on diphenols and related substances as donors, oxygen as acceptor / oxidoreductase, acting on paired donors, with incorporation or reduction of molecular oxygen, 2-oxoglutarate as one donor, and inc	senescence-related gene 1	senescence-related gene 1 (SRG1); CONTAINS InterPro DOMAIN/s: Oxoglutarate/iron-dependent oxygenase (InterPro:IPR005123); BEST Arabidopsis thaliana protein match is: 2-oxoglutarate (2OG) and Fe(II)-dependent oxygenase superfamily protein (TAIR:AT1G17010.1); Has 8560 Blast hits to 8517 proteins in 996 species: Archae - 0; Bacteria - 1133; Metazoa - 115; Fungi - 988; Plants - 4970; Viruses - 0; Oth…
cassava4.1_014505m.g	46.1337	70.7804	81.8569	49.9092	102.773	150.603	33.7456	70.4581	101.906	69.2995	6.16279	4.35156	C9	hormone metabolism.gibberelin.induced-regulated-responsive-activated	AT5G14920		gibberellin-regulated family protein	Gibberellin-regulated family protein	Gibberellin-regulated family protein; INVOLVED IN: response to gibberellin stimulus; LOCATED IN: endomembrane system; EXPRESSED IN: 22 plant structures; EXPRESSED DURING: 13 growth stages; CONTAINS InterPro DOMAIN/s: Gibberellin regulated protein (InterPro:IPR003854); BEST Arabidopsis thaliana protein match is: GAST1 protein homolog 3 (TAIR:AT4G09600.1); Has 178772 Blast hits to 67361 proteins in…
cassava4.1_019782m.g	40.6072	19.1265	37.7457	0.435254	0.654606	0.12519	0.100135	0.294393	0.655344	126.763	7.02558	3.60861	C4	hormone metabolism.gibberelin.induced-regulated-responsive-activated	AT5G15230	loc_os09g24840	GASA4 (GAST1 PROTEIN HOMOLOG 4)	GAST1 protein homolog 4	GAST1 protein homolog 4 (GASA4); FUNCTIONS IN: molecular_function unknown; INVOLVED IN: response to gibberellin stimulus, gibberellic acid mediated signaling pathway; LOCATED IN: endomembrane system; EXPRESSED IN: 23 plant structures; EXPRESSED DURING: 14 growth stages; CONTAINS InterPro DOMAIN/s: Gibberellin regulated protein (InterPro:IPR003854); BEST Arabidopsis thaliana protein match is: Gibb…
cassava4.1_019796m.g	53.8226	15.4718	25.1266	0	0	0.12519	0	0.098131	0	0.451757	0.246512	0	C6	hormone metabolism.gibberelin.induced-regulated-responsive-activated	AT1G74670	loc_os09g24840	gibberellin-responsive protein, putative	Gibberellin-regulated family protein	Gibberellin-regulated family protein; FUNCTIONS IN: molecular_function unknown; INVOLVED IN: in 6 processes; LOCATED IN: endomembrane system; EXPRESSED IN: 21 plant structures; EXPRESSED DURING: 13 growth stages; CONTAINS InterPro DOMAIN/s: Gibberellin regulated protein (InterPro:IPR003854); BEST Arabidopsis thaliana protein match is: GAST1 protein homolog 4 (TAIR:AT5G15230.1); Has 479 Blast hits…
cassava4.1_019810m.g	46.1337	28.9944	108.994	8.12475	1.63652	5.88391	0	0.098131	0.109224	107.247	5.54651	0.424542	C5	hormone metabolism.gibberelin.induced-regulated-responsive-activated	AT1G74670	loc_os09g24840	gibberellin-responsive protein, putative	Gibberellin-regulated family protein	Gibberellin-regulated family protein; FUNCTIONS IN: molecular_function unknown; INVOLVED IN: in 6 processes; LOCATED IN: endomembrane system; EXPRESSED IN: 21 plant structures; EXPRESSED DURING: 13 growth stages; CONTAINS InterPro DOMAIN/s: Gibberellin regulated protein (InterPro:IPR003854); BEST Arabidopsis thaliana protein match is: GAST1 protein homolog 4 (TAIR:AT5G15230.1); Has 479 Blast hits…
cassava4.1_019877m.g	1.68196	1.82738	2.45682	31.0481	21.1656	122.185	90.6224	110.299	256.349	108.331	68.407	77.5851	C10	hormone metabolism.gibberelin.induced-regulated-responsive-activated				#N/A	#N/A
cassava4.1_020286m.g	22.8266	7.55316	18.6495	1.30576	0.545505	1.75265	0.600811	0.883179	0.218448	51.681	20.9535	10.2952	C4	hormone metabolism.gibberelin.induced-regulated-responsive-activated				#N/A	#N/A
cassava4.1_029491m.g	1.08126	1.09643	0.335021	0	0	0	0	0	0	47.0731	0.739535	0	C4	hormone metabolism.gibberelin.induced-regulated-responsive-activated				#N/A	#N/A
cassava4.1_011041m.g	55.9851	76.628	97.8262	204.715	264.024	353.035	249.637	244.248	315.439	77.4312	187.472	279.773	C9	hormone metabolism.gibberelin.signal transduction	AT3G63010	loc_os05g33730	GID1B (GA INSENSITIVE DWARF1B); hydrolase	alpha/beta-Hydrolases superfamily protein	GA INSENSITIVE DWARF1B (GID1B); FUNCTIONS IN: hydrolase activity; INVOLVED IN: floral organ morphogenesis, raffinose family oligosaccharide biosynthetic process, positive regulation of gibberellic acid mediated signaling pathway, response to gibberellin stimulus, gibberellin mediated signaling pathway; LOCATED IN: cellular_component unknown; EXPRESSED IN: 21 plant structures; EXPRESSED DURING: 10…
cassava4.1_012090m.g	0.600699	0.121825	0.111674	0.435254	0.545505	0.250379	0.500676	0.196262	0.436896	48.7898	429.793	418.493	C1	hormone metabolism.gibberelin.synthesis-degradation	AT1G52800	loc_os08g32170	oxidoreductase, 2OG-Fe(II) oxygenase family protein	2-oxoglutarate (2OG) and Fe(II)-dependent oxygenase superfamily protein	2-oxoglutarate (2OG) and Fe(II)-dependent oxygenase superfamily protein; FUNCTIONS IN: oxidoreductase activity; LOCATED IN: cellular_component unknown; EXPRESSED IN: stem, root; CONTAINS InterPro DOMAIN/s: Oxoglutarate/iron-dependent oxygenase (InterPro:IPR005123); BEST Arabidopsis thaliana protein match is: 2-oxoglutarate (2OG) and Fe(II)-dependent oxygenase superfamily protein (TAIR:AT1G52790.1…
cassava4.1_022649m.g	0.600699	0.121825	0.111674	0.290169	0	0.12519	0.20027	0.098131	0.109224	485.368	71.7349	234.772	C4	hormone metabolism.gibberelin.synthesis-degradation	AT1G52820	loc_os08g32170	2-oxoglutarate-dependent dioxygenase, putative	2-oxoglutarate (2OG) and Fe(II)-dependent oxygenase superfamily protein	2-oxoglutarate (2OG) and Fe(II)-dependent oxygenase superfamily protein; FUNCTIONS IN: oxidoreductase activity; EXPRESSED IN: root; CONTAINS InterPro DOMAIN/s: Oxoglutarate/iron-dependent oxygenase (InterPro:IPR005123); BEST Arabidopsis thaliana protein match is: 2-oxoglutarate (2OG) and Fe(II)-dependent oxygenase superfamily protein (TAIR:AT4G03070.1); Has 7837 Blast hits to 7765 proteins in 980…
cassava4.1_025193m.g	0	0.121825	0.111674	0.145085	0	0	0	0.098131	0	55.2047	1.84884	1.80431	C4	hormone metabolism.gibberelin.synthesis-degradation	AT1G52800	loc_os05g50090	oxidoreductase, 2OG-Fe(II) oxygenase family protein	2-oxoglutarate (2OG) and Fe(II)-dependent oxygenase superfamily protein	2-oxoglutarate (2OG) and Fe(II)-dependent oxygenase superfamily protein; FUNCTIONS IN: oxidoreductase activity; LOCATED IN: cellular_component unknown; EXPRESSED IN: stem, root; CONTAINS InterPro DOMAIN/s: Oxoglutarate/iron-dependent oxygenase (InterPro:IPR005123); BEST Arabidopsis thaliana protein match is: 2-oxoglutarate (2OG) and Fe(II)-dependent oxygenase superfamily protein (TAIR:AT1G52790.1…
cassava4.1_026768m.g	0	0	0.111674	0	0.109101	0	0.100135	0.098131	0	8.31233	38.2093	25.4725	C1	hormone metabolism.gibberelin.synthesis-degradation	AT1G52790	loc_os08g32160	oxidoreductase, 2OG-Fe(II) oxygenase family protein	2-oxoglutarate (2OG) and Fe(II)-dependent oxygenase superfamily protein	2-oxoglutarate (2OG) and Fe(II)-dependent oxygenase superfamily protein; FUNCTIONS IN: oxidoreductase activity; LOCATED IN: cellular_component unknown; EXPRESSED IN: root, synergid; CONTAINS InterPro DOMAIN/s: Oxoglutarate/iron-dependent oxygenase (InterPro:IPR005123); BEST Arabidopsis thaliana protein match is: 2-oxoglutarate (2OG) and Fe(II)-dependent oxygenase superfamily protein (TAIR:AT1G528…
cassava4.1_028322m.g	0	0	0	0	0.109101	0	0	0.196262	0	90.0804	5.91628	14.2222	C4	hormone metabolism.gibberelin.synthesis-degradation	AT1G52820	loc_os08g32170	2-oxoglutarate-dependent dioxygenase, putative	2-oxoglutarate (2OG) and Fe(II)-dependent oxygenase superfamily protein	2-oxoglutarate (2OG) and Fe(II)-dependent oxygenase superfamily protein; FUNCTIONS IN: oxidoreductase activity; EXPRESSED IN: root; CONTAINS InterPro DOMAIN/s: Oxoglutarate/iron-dependent oxygenase (InterPro:IPR005123); BEST Arabidopsis thaliana protein match is: 2-oxoglutarate (2OG) and Fe(II)-dependent oxygenase superfamily protein (TAIR:AT4G03070.1); Has 7837 Blast hits to 7765 proteins in 980…
cassava4.1_029026m.g	0	0	0	0	0.109101	0.12519	0.100135	0	0	70.2934	19.2279	36.1922	C4	hormone metabolism.gibberelin.synthesis-degradation	AT1G52820	loc_os08g32170	2-oxoglutarate-dependent dioxygenase, putative	2-oxoglutarate (2OG) and Fe(II)-dependent oxygenase superfamily protein	2-oxoglutarate (2OG) and Fe(II)-dependent oxygenase superfamily protein; FUNCTIONS IN: oxidoreductase activity; EXPRESSED IN: root; CONTAINS InterPro DOMAIN/s: Oxoglutarate/iron-dependent oxygenase (InterPro:IPR005123); BEST Arabidopsis thaliana protein match is: 2-oxoglutarate (2OG) and Fe(II)-dependent oxygenase superfamily protein (TAIR:AT4G03070.1); Has 7837 Blast hits to 7765 proteins in 980…
cassava4.1_032583m.g	0.12014	0.121825	0.111674	0	0	0.12519	0	0.098131	0	50.3257	10.4767	40.2254	C4	hormone metabolism.gibberelin.synthesis-degradation	AT1G52820	loc_os08g32170	2-oxoglutarate-dependent dioxygenase, putative	2-oxoglutarate (2OG) and Fe(II)-dependent oxygenase superfamily protein	2-oxoglutarate (2OG) and Fe(II)-dependent oxygenase superfamily protein; FUNCTIONS IN: oxidoreductase activity; EXPRESSED IN: root; CONTAINS InterPro DOMAIN/s: Oxoglutarate/iron-dependent oxygenase (InterPro:IPR005123); BEST Arabidopsis thaliana protein match is: 2-oxoglutarate (2OG) and Fe(II)-dependent oxygenase superfamily protein (TAIR:AT4G03070.1); Has 7837 Blast hits to 7765 proteins in 980…
cassava4.1_024994m.g	7.56881	12.548	15.1876	43.3803	42.7676	21.4074	48.3653	39.2524	6.99033	0.271054	0.123256	0.106136	C8	hormone metabolism.gibberelin.synthesis-degradation.GA2 oxidase	AT4G21200	loc_os07g01340	GA2OX8 (GIBBERELLIN 2-OXIDASE 8); gibberellin 2-beta-dioxygenase	gibberellin 2-oxidase 8	gibberellin 2-oxidase 8 (GA2OX8); CONTAINS InterPro DOMAIN/s: Oxoglutarate/iron-dependent oxygenase (InterPro:IPR005123); BEST Arabidopsis thaliana protein match is: gibberellin 2-oxidase 7 (TAIR:AT1G50960.1); Has 8586 Blast hits to 8547 proteins in 1007 species: Archae - 0; Bacteria - 1133; Metazoa - 115; Fungi - 1020; Plants - 4926; Viruses - 0; Other Eukaryotes - 1392 (source: NCBI BLink).
cassava4.1_027847m.g	0.600699	0.365475	0.446695	1.8861	5.67325	4.7572	10.5142	10.1075	51.8814	8.04128	10.3535	12.7363	C10	hormone metabolism.jasmonate.synthesis-degradation.12-Oxo-PDA-reductase	AT1G76690	loc_os06g11210	OPR2	12-oxophytodienoate reductase 2	12-oxophytodienoate reductase 2 (OPR2); CONTAINS InterPro DOMAIN/s: Aldolase-type TIM barrel (InterPro:IPR013785), NADH:flavin oxidoreductase/NADH oxidase, N-terminal (InterPro:IPR001155); BEST Arabidopsis thaliana protein match is: 12-oxophytodienoate reductase 1 (TAIR:AT1G76680.1); Has 13197 Blast hits to 13176 proteins in 2056 species: Archae - 127; Bacteria - 9811; Metazoa - 29; Fungi - 865; …
cassava4.1_006101m.g	137.32	134.495	46.6796	136.38	138.558	45.8194	96.4302	91.9488	26.4322	14.0948	3.20465	3.2902	C8	hormone metabolism.jasmonate.synthesis-degradation.allene oxidase synthase	AT4G15440	loc_os02g02000	HPL1 (HYDROPEROXIDE LYASE 1); electron carrier/ heme binding / iron ion binding / monooxygenase	hydroperoxide lyase 1	hydroperoxide lyase 1 (HPL1); FUNCTIONS IN: electron carrier activity, monooxygenase activity, iron ion binding, heme binding; INVOLVED IN: fatty acid metabolic process, response to wounding; LOCATED IN: chloroplast envelope; EXPRESSED IN: 22 plant structures; EXPRESSED DURING: 13 growth stages; CONTAINS InterPro DOMAIN/s: Cytochrome P450 (InterPro:IPR001128), Cytochrome P450, E-class, group IV (…
cassava4.1_001238m.g	6.00699	9.25871	6.3654	7.54441	6.87336	10.7663	5.1069	5.49534	6.00732	28.4607	44.6186	6.58041	C3	hormone metabolism.jasmonate.synthesis-degradation.lipoxygenase	AT1G17420	loc_os03g08220	LOX3; electron carrier/ iron ion binding / lipoxygenase/ metal ion binding / oxidoreductase, acting on single donors with incorporation of molecular oxygen, incorporation of two atoms of oxygen	lipoxygenase 3	lipoxygenase 3 (LOX3); FUNCTIONS IN: oxidoreductase activity, acting on single donors with incorporation of molecular oxygen, incorporation of two atoms of oxygen, lipoxygenase activity, iron ion binding, metal ion binding; INVOLVED IN: growth, response to fungus, jasmonic acid biosynthetic process, response to wounding, defense response; LOCATED IN: chloroplast; EXPRESSED IN: 22 plant structures…
cassava4.1_001314m.g	34.36	44.3444	163.602	156.982	56.7325	241.866	45.3612	42.5889	167.222	0.903514	0.493023	29.9302	C9	hormone metabolism.jasmonate.synthesis-degradation.lipoxygenase	AT3G45140	loc_os08g39850	LOX2 (LIPOXYGENASE 2); lipoxygenase	lipoxygenase 2	lipoxygenase 2 (LOX2); FUNCTIONS IN: lipoxygenase activity; INVOLVED IN: in 7 processes; LOCATED IN: chloroplast thylakoid membrane, chloroplast stroma, chloroplast, chloroplast envelope; EXPRESSED IN: 24 plant structures; EXPRESSED DURING: 13 growth stages; CONTAINS InterPro DOMAIN/s: Lipoxygenase, iron binding site (InterPro:IPR020833), Lipoxygenase, C-terminal (InterPro:IPR013819), Lipoxygenas…
cassava4.1_001361m.g	20.0633	62.3745	59.9688	67.6095	58.6963	41.6881	30.7415	52.5982	32.4395	60.8065	14.2977	17.7246	C8	hormone metabolism.jasmonate.synthesis-degradation.lipoxygenase	AT3G45140	loc_os02g10120	LOX2 (LIPOXYGENASE 2); lipoxygenase	lipoxygenase 2	lipoxygenase 2 (LOX2); FUNCTIONS IN: lipoxygenase activity; INVOLVED IN: in 7 processes; LOCATED IN: chloroplast thylakoid membrane, chloroplast stroma, chloroplast, chloroplast envelope; EXPRESSED IN: 24 plant structures; EXPRESSED DURING: 13 growth stages; CONTAINS InterPro DOMAIN/s: Lipoxygenase, iron binding site (InterPro:IPR020833), Lipoxygenase, C-terminal (InterPro:IPR013819), Lipoxygenas…
cassava4.1_001431m.g	28.7134	38.0094	62.7606	35.1105	34.4759	50.0758	33.9458	44.944	127.792	32.7976	35.2512	36.1922	C10	hormone metabolism.jasmonate.synthesis-degradation.lipoxygenase	AT1G55020	loc_os03g49380	LOX1; lipoxygenase	lipoxygenase 1	lipoxygenase 1 (LOX1); CONTAINS InterPro DOMAIN/s: Lipoxygenase, iron binding site (InterPro:IPR020833), Lipoxygenase, C-terminal (InterPro:IPR013819), Lipoxygenase, LH2 (InterPro:IPR001024), Lipase/lipooxygenase, PLAT/LH2 (InterPro:IPR008976), Lipoxygenase, conserved site (InterPro:IPR020834), Lipoxygenase (InterPro:IPR000907), Lipoxygenase, plant (InterPro:IPR001246); BEST Arabidopsis thaliana …
cassava4.1_001506m.g	64.8755	57.0142	66.5576	83.4237	107.792	127.693	158.614	168.589	390.039	30.9905	5.66977	5.30678	C10	hormone metabolism.jasmonate.synthesis-degradation.lipoxygenase	AT3G22400	loc_os03g49380	LOX5; electron carrier/ iron ion binding / lipoxygenase/ metal ion binding / oxidoreductase, acting on single donors with incorporation of molecular oxygen, incorporation of two atoms of oxygen	PLAT/LH2 domain-containing lipoxygenase family protein	LOX5; FUNCTIONS IN: oxidoreductase activity, acting on single donors with incorporation of molecular oxygen, incorporation of two atoms of oxygen, lipoxygenase activity, iron ion binding, metal ion binding; INVOLVED IN: root development; LOCATED IN: chloroplast; EXPRESSED IN: 22 plant structures; EXPRESSED DURING: 13 growth stages; CONTAINS InterPro DOMAIN/s: Lipoxygenase, LH2 (InterPro:IPR001024…
cassava4.1_009987m.g	0.360419	1.34008	0.781716	5.07797	1.20011	2.12822	1.00135	2.35515	1.63836	527.833	41.0442	186.905	C4	hormone metabolism.salicylic acid.synthesis-degradation	AT1G68040	loc_os04g56950	S-adenosyl-L-methionine:carboxyl methyltransferase family protein	S-adenosyl-L-methionine-dependent methyltransferases superfamily protein	S-adenosyl-L-methionine-dependent methyltransferases superfamily protein; FUNCTIONS IN: S-adenosylmethionine-dependent methyltransferase activity, methyltransferase activity; INVOLVED IN: biological_process unknown; LOCATED IN: cellular_component unknown; EXPRESSED IN: root; CONTAINS InterPro DOMAIN/s: SAM dependent carboxyl methyltransferase (InterPro:IPR005299); BEST Arabidopsis thaliana protei…
cassava4.1_010155m.g	146.931	295.67	459.537	143.489	104.955	34.3019	79.4072	40.0375	61.4931	11.3843	4.31395	21.6517	C7	hormone metabolism.salicylic acid.synthesis-degradation	AT3G11480	loc_os01g50610	BSMT1; S-adenosylmethionine-dependent methyltransferase	S-adenosyl-L-methionine-dependent methyltransferases superfamily protein	BSMT1; CONTAINS InterPro DOMAIN/s: SAM dependent carboxyl methyltransferase (InterPro:IPR005299); BEST Arabidopsis thaliana protein match is: S-adenosyl-L-methionine-dependent methyltransferases superfamily protein (TAIR:AT5G04370.1); Has 958 Blast hits to 946 proteins in 124 species: Archae - 0; Bacteria - 67; Metazoa - 9; Fungi - 5; Plants - 736; Viruses - 0; Other Eukaryotes - 141 (source: NCB…
cassava4.1_010193m.g	22.7064	44.2225	18.5378	73.7031	28.9118	17.2762	40.3545	20.9019	23.0463	1.53597	0.493023	0.318407	C8	hormone metabolism.salicylic acid.synthesis-degradation	AT1G19640	loc_os01g50610	JMT (JASMONIC ACID CARBOXYL METHYLTRANSFERASE); jasmonate O-methyltransferase	jasmonic acid carboxyl methyltransferase	jasmonic acid carboxyl methyltransferase (JMT); CONTAINS InterPro DOMAIN/s: SAM dependent carboxyl methyltransferase (InterPro:IPR005299); BEST Arabidopsis thaliana protein match is: S-adenosyl-L-methionine-dependent methyltransferases superfamily protein (TAIR:AT3G11480.1); Has 890 Blast hits to 871 proteins in 121 species: Archae - 0; Bacteria - 61; Metazoa - 9; Fungi - 5; Plants - 740; Viruses…
cassava4.1_028707m.g	0	0	0.111674	0	0	0.250379	0	0.392524	8.08257	11.2036	153.577	76.5238	C1	hormone metabolism.salicylic acid.synthesis-degradation	AT1G68040	loc_os04g56950	S-adenosyl-L-methionine:carboxyl methyltransferase family protein	S-adenosyl-L-methionine-dependent methyltransferases superfamily protein	S-adenosyl-L-methionine-dependent methyltransferases superfamily protein; FUNCTIONS IN: S-adenosylmethionine-dependent methyltransferase activity, methyltransferase activity; INVOLVED IN: biological_process unknown; LOCATED IN: cellular_component unknown; EXPRESSED IN: root; CONTAINS InterPro DOMAIN/s: SAM dependent carboxyl methyltransferase (InterPro:IPR005299); BEST Arabidopsis thaliana protei…

## Sheet: Table S4
Table S4. A list of 170 differentially expressed transcription factor genes.
geneid	FL00	FL03	FL24	FEL00	FEL03	FEL24	BL00	BL03	BL24	RT00	RT03	RT24	groupinfo	groupinfo2	TF.group.zh	mapman.ANN	At.homolog	rice.homolog	mapman.description	TAIR10.short_description	TAIR10.ANN
cassava4.1_012885m.g	5.28615	8.64959	5.80703	9.72068	10.2555	16.3998	15.9215	10.4019	32.658	12.8299	11.4628	10.0829	C10	G6	ABI3/VP1	RNA.regulation of transcription.ABI3/VP1-related B3-domain-containing transcription factor family	AT2G46870	loc_os02g45850	NGA1 (NGATHA1); transcription factor	AP2/B3-like transcriptional factor family protein	NGATHA1 (NGA1); CONTAINS InterPro DOMAIN/s: Transcriptional factor B3 (InterPro:IPR003340); BEST Arabidopsis thaliana protein match is: AP2/B3-like transcriptional factor family protein (TAIR:AT3G61970.1); Has 1372 Blast hits to 1367 proteins in 72 species: Archae - 0; Bacteria - 0; Metazoa - 0; Fungi - 0; Plants - 1372; Viruses - 0; Other Eukaryotes - 0 (source: NCBI BLink).
cassava4.1_012252m.g	0.600699	0.730951	0.558369	1.30576	1.85472	2.00303	6.80919	9.8131	7.7549	6.1439	28.9651	35.237	C2	G1	ABI3/VP1	RNA.regulation of transcription.ABI3/VP1-related B3-domain-containing transcription factor family	AT2G36080	loc_os11g05740	DNA-binding protein, putative	AP2/B3-like transcriptional factor family protein	AP2/B3-like transcriptional factor family protein; CONTAINS InterPro DOMAIN/s: Transcriptional factor B3 (InterPro:IPR003340); BEST Arabidopsis thaliana protein match is: AP2/B3-like transcriptional factor family protein (TAIR:AT5G06250.2); Has 1380 Blast hits to 1378 proteins in 71 species: Archae - 0; Bacteria - 0; Metazoa - 0; Fungi - 0; Plants - 1380; Viruses - 0; Other Eukaryotes - 0 (source…
cassava4.1_022297m.g	0	0	0	0	0	0.250379	0	0	0	3.88511	54.6023	17.3001	C1	G1	AP2/EREBP	RNA.regulation of transcription.AP2/EREBP, APETALA2/Ethylene-responsive element binding protein family	AT3G54320	loc_os06g05340	WRI1 (WRINKLED 1); DNA binding / transcription factor	Integrase-type DNA-binding superfamily protein	WRINKLED 1 (WRI1); CONTAINS InterPro DOMAIN/s: DNA-binding, integrase-type (InterPro:IPR016177), Pathogenesis-related transcriptional factor/ERF, DNA-binding (InterPro:IPR001471); BEST Arabidopsis thaliana protein match is: Integrase-type DNA-binding superfamily protein (TAIR:AT1G79700.2); Has 9494 Blast hits to 5549 proteins in 332 species: Archae - 18; Bacteria - 68; Metazoa - 1307; Fungi - 140…
cassava4.1_030547m.g	0	0.121825	0.223347	0	0.109101	0.12519	0	0.098131	0.218448	21.0519	121.777	113.141	C1	G1	AP2/EREBP	RNA.regulation of transcription.AP2/EREBP, APETALA2/Ethylene-responsive element binding protein family				#N/A	#N/A
cassava4.1_014632m.g	4.32503	3.28928	3.46189	0.435254	1.41831	1.62746	3.4046	7.06544	35.0609	16.8054	28.7186	21.4394	C10	G6	AP2/EREBP	RNA.regulation of transcription.AP2/EREBP, APETALA2/Ethylene-responsive element binding protein family	AT5G13330	loc_os04g32620	Rap2.6L (related to AP2 6L); DNA binding / transcription factor	related to AP2 6l	related to AP2 6l (Rap2.6L); FUNCTIONS IN: DNA binding, sequence-specific DNA binding transcription factor activity; INVOLVED IN: regulation of transcription, DNA-dependent; LOCATED IN: nucleus; EXPRESSED IN: 11 plant structures; EXPRESSED DURING: LP.04 four leaves visible, 4 anthesis, C globular stage, petal differentiation and expansion stage, E expanded cotyledon stage; CONTAINS InterPro DOMAI…
cassava4.1_023527m.g	90.7055	80.7701	77.7249	51.0698	60.7693	52.4544	50.4681	62.4113	177.38	47.1634	87.5116	134.155	C10	G6	AP2/EREBP	RNA.regulation of transcription.AP2/EREBP, APETALA2/Ethylene-responsive element binding protein family	AT1G78080	loc_os02g51670	RAP2.4 (related to AP2 4); DNA binding / transcription factor	related to AP2 4	related to AP2 4 (RAP2.4); CONTAINS InterPro DOMAIN/s: DNA-binding, integrase-type (InterPro:IPR016177), Pathogenesis-related transcriptional factor/ERF, DNA-binding (InterPro:IPR001471); BEST Arabidopsis thaliana protein match is: Integrase-type DNA-binding superfamily protein (TAIR:AT1G22190.1); Has 5853 Blast hits to 5721 proteins in 258 species: Archae - 0; Bacteria - 10; Metazoa - 0; Fungi -…
cassava4.1_029328m.g	15.7383	20.223	18.5378	33.5146	22.3657	83.6266	33.5453	32.7758	106.384	22.0457	31.9232	45.8506	C10	G6	AP2/EREBP	RNA.regulation of transcription.AP2/EREBP, APETALA2/Ethylene-responsive element binding protein family	AT3G50260	loc_os04g55520	CEJ1 (COOPERATIVELY REGULATED BY ETHYLENE AND JASMONATE 1); DNA binding / transcription factor	cooperatively regulated by ethylene and jasmonate 1	cooperatively regulated by ethylene and jasmonate 1 (CEJ1); CONTAINS InterPro DOMAIN/s: DNA-binding, integrase-type (InterPro:IPR016177), Pathogenesis-related transcriptional factor/ERF, DNA-binding (InterPro:IPR001471); BEST Arabidopsis thaliana protein match is: DREB and EAR motif protein 2 (TAIR:AT5G67190.1); Has 5544 Blast hits to 5466 proteins in 235 species: Archae - 0; Bacteria - 0; Metazo…
cassava4.1_033803m.g	2.16252	4.02023	4.46695	2.32136	3.70943	11.0167	5.80784	8.5374	32.9856	10.6615	11.2163	28.6566	C10	G6	AP2/EREBP	RNA.regulation of transcription.AP2/EREBP, APETALA2/Ethylene-responsive element binding protein family	AT3G50260	loc_os06g07030	CEJ1 (COOPERATIVELY REGULATED BY ETHYLENE AND JASMONATE 1); DNA binding / transcription factor	cooperatively regulated by ethylene and jasmonate 1	cooperatively regulated by ethylene and jasmonate 1 (CEJ1); CONTAINS InterPro DOMAIN/s: DNA-binding, integrase-type (InterPro:IPR016177), Pathogenesis-related transcriptional factor/ERF, DNA-binding (InterPro:IPR001471); BEST Arabidopsis thaliana protein match is: DREB and EAR motif protein 2 (TAIR:AT5G67190.1); Has 5544 Blast hits to 5466 proteins in 235 species: Archae - 0; Bacteria - 0; Metazo…
cassava4.1_008867m.g	0.24028	0.487301	0.89339	0.435254	0.436404	1.37709	1.10149	1.76636	3.93206	18.9738	72.4744	100.404	C2	G1	AP2/EREBP	RNA.regulation of transcription.AP2/EREBP, APETALA2/Ethylene-responsive element binding protein family	AT5G19790	loc_os12g39330	RAP2.11 (related to AP2 11); DNA binding / transcription factor	related to AP2 11	related to AP2 11 (RAP2.11); FUNCTIONS IN: DNA binding, sequence-specific DNA binding transcription factor activity; INVOLVED IN: regulation of transcription, DNA-dependent; LOCATED IN: nucleus; EXPRESSED IN: root hair, epidermis, primary root differentiation zone; CONTAINS InterPro DOMAIN/s: DNA-binding, integrase-type (InterPro:IPR016177), Pathogenesis-related transcriptional factor/ERF, DNA-bi…
cassava4.1_013880m.g	46.0135	45.1971	61.6439	49.4739	36.767	128.069	44.3599	27.8692	32.5487	82.3102	141.128	225.007	C2	G1	AP2/EREBP	RNA.regulation of transcription.AP2/EREBP, APETALA2/Ethylene-responsive element binding protein family	AT3G16770	loc_os06g09390	ATEBP (ETHYLENE-RESPONSIVE ELEMENT BINDING PROTEIN); DNA binding / protein binding / transcription activator/ transcription factor	ethylene-responsive element binding protein	ethylene-responsive element binding protein (EBP); CONTAINS InterPro DOMAIN/s: DNA-binding, integrase-type (InterPro:IPR016177), Pathogenesis-related transcriptional factor/ERF, DNA-binding (InterPro:IPR001471); BEST Arabidopsis thaliana protein match is: Integrase-type DNA-binding superfamily protein (TAIR:AT2G47520.1); Has 5957 Blast hits to 5752 proteins in 250 species: Archae - 0; Bacteria - …
cassava4.1_021075m.g	0	0.24365	0	0.145085	0.218202	0.625948	0.20027	0.196262	0.218448	11.9264	32.786	62.4077	C2	G1	AP2/EREBP	RNA.regulation of transcription.AP2/EREBP, APETALA2/Ethylene-responsive element binding protein family				#N/A	#N/A
cassava4.1_025233m.g	42.1691	50.3138	43.3294	2.32136	4.14584	1.37709	1.40189	0.883179	1.09224	13.8238	49.0558	66.4409	C2	G1	AP2/EREBP	RNA.regulation of transcription.AP2/EREBP, APETALA2/Ethylene-responsive element binding protein family	AT1G16060	loc_os09g25600	ovule development protein, putative	ARIA-interacting double AP2 domain protein	ARIA-interacting double AP2 domain protein (ADAP); CONTAINS InterPro DOMAIN/s: DNA-binding, integrase-type (InterPro:IPR016177), Pathogenesis-related transcriptional factor/ERF, DNA-binding (InterPro:IPR001471); BEST Arabidopsis thaliana protein match is: Integrase-type DNA-binding superfamily protein (TAIR:AT1G79700.2); Has 6422 Blast hits to 4728 proteins in 256 species: Archae - 0; Bacteria - …
cassava4.1_028498m.g	0.360419	0.24365	0.335021	0.145085	0.218202	0	0	0.098131	0	28.4607	44.1256	93.3993	C2	G1	AP2/EREBP	RNA.regulation of transcription.AP2/EREBP, APETALA2/Ethylene-responsive element binding protein family				#N/A	#N/A
cassava4.1_015361m.g	1.44168	1.58373	3.90858	0.145085	0.218202	0.12519	0.901217	0.686917	0.327672	44.1818	73.5837	4.66997	C3	G2	AP2/EREBP	RNA.regulation of transcription.AP2/EREBP, APETALA2/Ethylene-responsive element binding protein family	AT4G25480	loc_os04g48350	DREB1A (DEHYDRATION RESPONSE ELEMENT B1A); DNA binding / transcription activator/ transcription factor	dehydration response element B1A	dehydration response element B1A (DREB1A); CONTAINS InterPro DOMAIN/s: DNA-binding, integrase-type (InterPro:IPR016177), Pathogenesis-related transcriptional factor/ERF, DNA-binding (InterPro:IPR001471); BEST Arabidopsis thaliana protein match is: C-repeat/DRE binding factor 2 (TAIR:AT4G25470.1); Has 30201 Blast hits to 17322 proteins in 780 species: Archae - 12; Bacteria - 1396; Metazoa - 17338;…
cassava4.1_015402m.g	7.44867	4.14206	3.90858	4.49763	1.52741	1.12671	2.40324	6.86917	3.49517	98.8445	139.649	33.4327	C3	G2	AP2/EREBP	RNA.regulation of transcription.AP2/EREBP, APETALA2/Ethylene-responsive element binding protein family	AT5G52020	loc_os02g45420	AP2 domain-containing protein	Integrase-type DNA-binding superfamily protein	Integrase-type DNA-binding superfamily protein; FUNCTIONS IN: DNA binding, transcription activator activity, sequence-specific DNA binding transcription factor activity; INVOLVED IN: defense response to fungus; LOCATED IN: chloroplast; EXPRESSED IN: root, flower; EXPRESSED DURING: petal differentiation and expansion stage; CONTAINS InterPro DOMAIN/s: DNA-binding, integrase-type (InterPro:IPR01617…
cassava4.1_015843m.g	0.720839	0.487301	0.781716	0.145085	0	0.12519	0.700946	1.07944	0.764568	47.7959	66.3116	12.3117	C3	G2	AP2/EREBP	RNA.regulation of transcription.AP2/EREBP, APETALA2/Ethylene-responsive element binding protein family	AT4G25480	loc_os04g48350	DREB1A (DEHYDRATION RESPONSE ELEMENT B1A); DNA binding / transcription activator/ transcription factor	dehydration response element B1A	dehydration response element B1A (DREB1A); CONTAINS InterPro DOMAIN/s: DNA-binding, integrase-type (InterPro:IPR016177), Pathogenesis-related transcriptional factor/ERF, DNA-binding (InterPro:IPR001471); BEST Arabidopsis thaliana protein match is: C-repeat/DRE binding factor 2 (TAIR:AT4G25470.1); Has 30201 Blast hits to 17322 proteins in 780 species: Archae - 12; Bacteria - 1396; Metazoa - 17338;…
cassava4.1_023719m.g	0.12014	0	0	0	0.109101	0.12519	0	0.294393	0	21.1422	37.7163	7.53563	C3	G2	AP2/EREBP	RNA.regulation of transcription.AP2/EREBP, APETALA2/Ethylene-responsive element binding protein family	AT5G51990	loc_os01g73770	CBF4 (C- REPEAT-BINDING FACTOR 4); DNA binding / transcription activator/ transcription factor	C-repeat-binding factor 4	C-repeat-binding factor 4 (CBF4); FUNCTIONS IN: DNA binding, transcription activator activity, sequence-specific DNA binding transcription factor activity; INVOLVED IN: response to water deprivation, regulation of transcription, DNA-dependent, response to abscisic acid stimulus; LOCATED IN: nucleus, chloroplast; EXPRESSED IN: stem, root, pedicel, carpel; EXPRESSED DURING: 4 anthesis, petal differ…
cassava4.1_002957m.g	33.9996	10.8424	47.238	2.03119	2.07292	1.2519	1.00135	1.17757	0.655344	6.95706	4.80698	1.37976	C7	G4	AP2/EREBP	RNA.regulation of transcription.AP2/EREBP, APETALA2/Ethylene-responsive element binding protein family	AT4G37750	loc_os03g56050	ANT (AINTEGUMENTA); DNA binding / transcription factor	Integrase-type DNA-binding superfamily protein	AINTEGUMENTA (ANT); CONTAINS InterPro DOMAIN/s: DNA-binding, integrase-type (InterPro:IPR016177), Pathogenesis-related transcriptional factor/ERF, DNA-binding (InterPro:IPR001471); BEST Arabidopsis thaliana protein match is: Integrase-type DNA-binding superfamily protein (TAIR:AT1G72570.1); Has 7251 Blast hits to 5191 proteins in 264 species: Archae - 0; Bacteria - 9; Metazoa - 18; Fungi - 8; Pla…
cassava4.1_003216m.g	15.498	6.45673	30.9336	0.290169	0.545505	0.12519	0.300406	0.490655	0.873792	0.0903514	0.246512	0	C7	G4	AP2/EREBP	RNA.regulation of transcription.AP2/EREBP, APETALA2/Ethylene-responsive element binding protein family	AT4G37750	loc_os03g56050	ANT (AINTEGUMENTA); DNA binding / transcription factor	Integrase-type DNA-binding superfamily protein	AINTEGUMENTA (ANT); CONTAINS InterPro DOMAIN/s: DNA-binding, integrase-type (InterPro:IPR016177), Pathogenesis-related transcriptional factor/ERF, DNA-binding (InterPro:IPR001471); BEST Arabidopsis thaliana protein match is: Integrase-type DNA-binding superfamily protein (TAIR:AT1G72570.1); Has 7251 Blast hits to 5191 proteins in 264 species: Archae - 0; Bacteria - 9; Metazoa - 18; Fungi - 8; Pla…
cassava4.1_006897m.g	6.36741	13.8881	4.13193	36.4163	12.2193	10.1404	15.1204	13.8365	7.20878	9.57725	11.586	18.0431	C8	G5	AP2/EREBP	RNA.regulation of transcription.AP2/EREBP, APETALA2/Ethylene-responsive element binding protein family	AT2G20880	loc_os04g44670	AP2 domain-containing transcription factor, putative	Integrase-type DNA-binding superfamily protein	Integrase-type DNA-binding superfamily protein; FUNCTIONS IN: DNA binding, sequence-specific DNA binding transcription factor activity; INVOLVED IN: regulation of transcription, DNA-dependent; LOCATED IN: nucleus, cytoplasm; EXPRESSED IN: stamen; EXPRESSED DURING: 4 anthesis, petal differentiation and expansion stage; CONTAINS InterPro DOMAIN/s: DNA-binding, integrase-type (InterPro:IPR016177), P…
cassava4.1_029110m.g	9.01048	11.5734	4.35528	34.8203	33.1667	14.522	25.1339	30.2244	7.86412	4.42722	7.02558	11.5688	C8	G5	AP2/EREBP	RNA.regulation of transcription.AP2/EREBP, APETALA2/Ethylene-responsive element binding protein family	AT2G40340	loc_os01g07120	AP2 domain-containing transcription factor, putative (DRE2B)	Integrase-type DNA-binding superfamily protein	DREB2C; CONTAINS InterPro DOMAIN/s: DNA-binding, integrase-type (InterPro:IPR016177), Pathogenesis-related transcriptional factor/ERF, DNA-binding (InterPro:IPR001471); BEST Arabidopsis thaliana protein match is: Integrase-type DNA-binding superfamily protein (TAIR:AT2G40350.1); Has 5601 Blast hits to 5564 proteins in 248 species: Archae - 0; Bacteria - 0; Metazoa - 0; Fungi - 0; Plants - 5583; V…
cassava4.1_021785m.g	5.04587	10.5988	13.5125	4.49763	5.56415	50.7018	6.20838	7.85048	25.2307	5.51144	12.5721	18.2553	C9	G3	AP2/EREBP	RNA.regulation of transcription.AP2/EREBP, APETALA2/Ethylene-responsive element binding protein family	AT1G16060	loc_os09g25600	ovule development protein, putative	ARIA-interacting double AP2 domain protein	ARIA-interacting double AP2 domain protein (ADAP); CONTAINS InterPro DOMAIN/s: DNA-binding, integrase-type (InterPro:IPR016177), Pathogenesis-related transcriptional factor/ERF, DNA-binding (InterPro:IPR001471); BEST Arabidopsis thaliana protein match is: Integrase-type DNA-binding superfamily protein (TAIR:AT1G79700.2); Has 6422 Blast hits to 4728 proteins in 256 species: Archae - 0; Bacteria - …
cassava4.1_001105m.g	35.5614	17.6646	78.395	8.70508	8.61898	7.38618	7.61028	10.5	16.602	36.3213	52.1372	33.1143	C3	G4	ARF	RNA.regulation of transcription.ARF, Auxin Response Factor family	AT1G19850	loc_os04g56850	MP (MONOPTEROS); transcription factor	Transcriptional factor B3 family protein / auxin-responsive factor AUX/IAA-related	MONOPTEROS (MP); FUNCTIONS IN: sequence-specific DNA binding transcription factor activity, promoter binding; INVOLVED IN: in 8 processes; LOCATED IN: nucleus, membrane; EXPRESSED IN: 21 plant structures; EXPRESSED DURING: 11 growth stages; CONTAINS InterPro DOMAIN/s: Aux/IAA-ARF-dimerisation (InterPro:IPR011525), Transcriptional factor B3 (InterPro:IPR003340), AUX/IAA protein (InterPro:IPR003311…
cassava4.1_001995m.g	18.5015	26.5579	41.0959	37.722	27.1661	19.9051	43.8592	37.9767	12.4515	28.5511	19.4744	17.4062	C8	G5	ARF	RNA.regulation of transcription.ARF, Auxin Response Factor family	AT5G60450	loc_os05g48870	ARF4 (AUXIN RESPONSE FACTOR 4); transcription factor	auxin response factor 4	auxin response factor 4 (ARF4); FUNCTIONS IN: sequence-specific DNA binding transcription factor activity; INVOLVED IN: vegetative phase change, regulation of transcription, DNA-dependent, abaxial cell fate specification; LOCATED IN: nucleus; EXPRESSED IN: 25 plant structures; EXPRESSED DURING: 12 growth stages; CONTAINS InterPro DOMAIN/s: Aux/IAA-ARF-dimerisation (InterPro:IPR011525), Transcript…
cassava4.1_002915m.g	12.7348	8.04046	12.7308	38.7376	48.2226	52.0789	56.7767	87.4348	26.5414	19.4256	14.6674	18.4676	C8	G5	ARR	RNA.regulation of transcription.ARR	AT2G25180	loc_os02g55320	ARR12 (ARABIDOPSIS RESPONSE REGULATOR 12); transcription factor/ two-component response regulator	response regulator 12	response regulator 12 (RR12); CONTAINS InterPro DOMAIN/s: Response regulator, plant B-type (InterPro:IPR017053), Myb-like DNA-binding domain, SHAQKYF class (InterPro:IPR006447), CheY-like (InterPro:IPR011006), Myb, DNA-binding (InterPro:IPR014778), Homeodomain-like (InterPro:IPR009057), Signal transduction response regulator, receiver domain (InterPro:IPR001789), HTH transcriptional regulator, My…
cassava4.1_028798m.g	0	0	0	0	0	0	0	0	0	5.24038	37.2232	4.35156	C1	G1	AS2	RNA.regulation of transcription.AS2,Lateral Organ Boundaries Gene Family	AT1G68510	loc_os01g32770	LBD42 (LOB DOMAIN-CONTAINING PROTEIN 42)	LOB domain-containing protein 42	LOB domain-containing protein 42 (LBD42); CONTAINS InterPro DOMAIN/s: Lateral organ boundaries, LOB (InterPro:IPR004883), Asymmetric leaves, AS2/LOB (InterPro:IPR017414); BEST Arabidopsis thaliana protein match is: LOB domain-containing protein 41 (TAIR:AT3G02550.1); Has 393 Blast hits to 393 proteins in 23 species: Archae - 0; Bacteria - 0; Metazoa - 0; Fungi - 4; Plants - 389; Viruses - 0; Othe…
cassava4.1_010089m.g	49.1372	63.4709	169.297	85.3098	76.3707	178.395	89.3206	96.1684	210.802	91.4356	98.7279	132.245	C10	G3	Aux/IAA	RNA.regulation of transcription.Aux/IAA family	AT5G65670	loc_os12g40890	IAA9 (INDOLE-3-ACETIC ACID INDUCIBLE 9); transcription factor	indole-3-acetic acid inducible 9	indole-3-acetic acid inducible 9 (IAA9); CONTAINS InterPro DOMAIN/s: Aux/IAA-ARF-dimerisation (InterPro:IPR011525), AUX/IAA protein (InterPro:IPR003311); BEST Arabidopsis thaliana protein match is: indoleacetic acid-induced protein 8 (TAIR:AT2G22670.4); Has 2126 Blast hits to 2124 proteins in 85 species: Archae - 0; Bacteria - 0; Metazoa - 1; Fungi - 3; Plants - 2121; Viruses - 0; Other Eukaryote…
cassava4.1_014900m.g	19.3425	30.8218	65.2175	31.3383	10.801	13.896	1.30176	6.37852	2.40293	156.218	110.191	108.046	C3	G2	Aux/IAA	RNA.regulation of transcription.Aux/IAA family	AT3G23050	loc_os12g40890	IAA7 (INDOLE-3-ACETIC ACID 7); transcription factor	indole-3-acetic acid 7	indole-3-acetic acid 7 (IAA7); CONTAINS InterPro DOMAIN/s: Aux/IAA-ARF-dimerisation (InterPro:IPR011525), AUX/IAA protein (InterPro:IPR003311); BEST Arabidopsis thaliana protein match is: indole-3-acetic acid inducible 14 (TAIR:AT4G14550.1); Has 1682 Blast hits to 1681 proteins in 74 species: Archae - 0; Bacteria - 0; Metazoa - 0; Fungi - 0; Plants - 1681; Viruses - 0; Other Eukaryotes - 1 (sourc…
cassava4.1_009755m.g	33.1586	28.7507	49.8065	36.7064	23.3476	21.4074	19.1258	11.8739	4.80585	63.9688	29.9512	21.0148	C4	G2	Aux/IAA	RNA.regulation of transcription.Aux/IAA family	AT5G65670	loc_os12g40890	IAA9 (INDOLE-3-ACETIC ACID INDUCIBLE 9); transcription factor	indole-3-acetic acid inducible 9	indole-3-acetic acid inducible 9 (IAA9); CONTAINS InterPro DOMAIN/s: Aux/IAA-ARF-dimerisation (InterPro:IPR011525), AUX/IAA protein (InterPro:IPR003311); BEST Arabidopsis thaliana protein match is: indoleacetic acid-induced protein 8 (TAIR:AT2G22670.4); Has 2126 Blast hits to 2124 proteins in 85 species: Archae - 0; Bacteria - 0; Metazoa - 1; Fungi - 3; Plants - 2121; Viruses - 0; Other Eukaryote…
cassava4.1_015288m.g	12.6147	14.619	37.7457	7.83458	6.00056	21.157	1.80243	2.55141	1.96603	49.5126	2.58837	0.530678	C4	G4	Aux/IAA	RNA.regulation of transcription.Aux/IAA family	AT4G14550	loc_os12g40890	IAA14 (INDOLE-3-ACETIC ACID INDUCIBLE 14); protein binding / transcription factor/ transcription repressor	indole-3-acetic acid inducible 14	indole-3-acetic acid inducible 14 (IAA14); CONTAINS InterPro DOMAIN/s: Aux/IAA-ARF-dimerisation (InterPro:IPR011525), AUX/IAA protein (InterPro:IPR003311); BEST Arabidopsis thaliana protein match is: indole-3-acetic acid 7 (TAIR:AT3G23050.1); Has 30201 Blast hits to 17322 proteins in 780 species: Archae - 12; Bacteria - 1396; Metazoa - 17338; Fungi - 3422; Plants - 5037; Viruses - 0; Other Eukary…
cassava4.1_014928m.g	145.009	151.429	221.449	88.9369	46.0406	21.157	25.935	20.1169	11.1408	147.002	18.2419	15.0713	C6	G4	Aux/IAA	RNA.regulation of transcription.Aux/IAA family	AT4G14550	loc_os12g40890	IAA14 (INDOLE-3-ACETIC ACID INDUCIBLE 14); protein binding / transcription factor/ transcription repressor	indole-3-acetic acid inducible 14	indole-3-acetic acid inducible 14 (IAA14); CONTAINS InterPro DOMAIN/s: Aux/IAA-ARF-dimerisation (InterPro:IPR011525), AUX/IAA protein (InterPro:IPR003311); BEST Arabidopsis thaliana protein match is: indole-3-acetic acid 7 (TAIR:AT3G23050.1); Has 30201 Blast hits to 17322 proteins in 780 species: Archae - 12; Bacteria - 1396; Metazoa - 17338; Fungi - 3422; Plants - 5037; Viruses - 0; Other Eukary…
cassava4.1_014849m.g	114.613	85.1558	114.689	129.706	79.971	85.2541	85.7157	56.5235	28.5074	50.9582	41.1674	32.5836	C6	G5	Aux/IAA	RNA.regulation of transcription.Aux/IAA family	AT3G04730	loc_os12g40890	IAA16; transcription factor	indoleacetic acid-induced protein 16	indoleacetic acid-induced protein 16 (IAA16); FUNCTIONS IN: sequence-specific DNA binding transcription factor activity; INVOLVED IN: response to auxin stimulus; LOCATED IN: nucleus; EXPRESSED IN: 22 plant structures; EXPRESSED DURING: 13 growth stages; CONTAINS InterPro DOMAIN/s: Aux/IAA-ARF-dimerisation (InterPro:IPR011525), AUX/IAA protein (InterPro:IPR003311); BEST Arabidopsis thaliana protei…
cassava4.1_010892m.g	34.4801	14.0099	53.045	7.54441	8.40078	16.3998	13.4181	12.4626	18.022	19.8773	33.7721	27.2768	C7	G4	Aux/IAA	RNA.regulation of transcription.Aux/IAA family	AT3G16500	loc_os05g44810	PAP1 (PHYTOCHROME-ASSOCIATED PROTEIN 1); transcription factor	phytochrome-associated protein 1	phytochrome-associated protein 1 (PAP1); FUNCTIONS IN: sequence-specific DNA binding transcription factor activity; INVOLVED IN: response to auxin stimulus; LOCATED IN: nucleus; EXPRESSED IN: 22 plant structures; EXPRESSED DURING: 13 growth stages; CONTAINS InterPro DOMAIN/s: Aux/IAA-ARF-dimerisation (InterPro:IPR011525), AUX/IAA protein (InterPro:IPR003311); BEST Arabidopsis thaliana protein mat…
cassava4.1_011679m.g	0.961118	0.730951	1.56343	0.145085	0.109101	0	0.20027	0	0.109224	13.1913	46.2209	64.7427	C2	G1	bHLH	RNA.regulation of transcription.bHLH,Basic Helix-Loop-Helix family	AT1G72210	loc_os03g08930	basic helix-loop-helix (bHLH) family protein (bHLH096)	basic helix-loop-helix (bHLH) DNA-binding superfamily protein	basic helix-loop-helix (bHLH) DNA-binding superfamily protein; FUNCTIONS IN: DNA binding, sequence-specific DNA binding transcription factor activity; INVOLVED IN: regulation of transcription; LOCATED IN: nucleus; CONTAINS InterPro DOMAIN/s: Helix-loop-helix DNA-binding domain (InterPro:IPR001092), Helix-loop-helix DNA-binding (InterPro:IPR011598); BEST Arabidopsis thaliana protein match is: basi…
cassava4.1_004810m.g	6.72783	14.1317	5.36034	3.04678	4.36404	1.2519	1.80243	1.37383	1.09224	59.903	24.8977	17.3001	C4	G2	bHLH	RNA.regulation of transcription.bHLH,Basic Helix-Loop-Helix family	AT3G07340	loc_os01g68700	basic helix-loop-helix (bHLH) family protein	basic helix-loop-helix (bHLH) DNA-binding superfamily protein	basic helix-loop-helix (bHLH) DNA-binding superfamily protein; FUNCTIONS IN: DNA binding, sequence-specific DNA binding transcription factor activity; INVOLVED IN: regulation of transcription; LOCATED IN: nucleus, chloroplast; EXPRESSED IN: 22 plant structures; EXPRESSED DURING: 11 growth stages; CONTAINS InterPro DOMAIN/s: Helix-loop-helix DNA-binding domain (InterPro:IPR001092), Helix-loop-heli…
cassava4.1_008929m.g	16.0987	10.7206	27.5834	6.09356	4.58224	5.88391	1.60216	1.66823	1.41991	39.6643	13.3116	9.65834	C4	G2	bHLH	RNA.regulation of transcription.bHLH,Basic Helix-Loop-Helix family	AT1G10120	loc_os03g51910	DNA binding / transcription factor	basic helix-loop-helix (bHLH) DNA-binding superfamily protein	basic helix-loop-helix (bHLH) DNA-binding superfamily protein; FUNCTIONS IN: DNA binding, sequence-specific DNA binding transcription factor activity; INVOLVED IN: regulation of transcription; LOCATED IN: nucleus; EXPRESSED IN: 22 plant structures; EXPRESSED DURING: 13 growth stages; CONTAINS InterPro DOMAIN/s: Helix-loop-helix DNA-binding domain (InterPro:IPR001092), Helix-loop-helix DNA-binding…
cassava4.1_030779m.g	0	0	0	0	0	0	0.100135	0	0	34.5142	5.42325	26.3216	C4	G2	bHLH	RNA.regulation of transcription.bHLH,Basic Helix-Loop-Helix family	AT3G56970	loc_os01g72370	BHLH038; DNA binding / transcription factor	basic helix-loop-helix (bHLH) DNA-binding superfamily protein	BHLH038; FUNCTIONS IN: DNA binding, sequence-specific DNA binding transcription factor activity; INVOLVED IN: regulation of transcription; LOCATED IN: nucleus; CONTAINS InterPro DOMAIN/s: Achaete-scute transcription factor related (InterPro:IPR015660), Helix-loop-helix DNA-binding domain (InterPro:IPR001092), Helix-loop-helix DNA-binding (InterPro:IPR011598); BEST Arabidopsis thaliana protein mat…
cassava4.1_009290m.g	44.4517	27.898	36.0706	47.1525	21.3838	8.13732	6.60892	5.10281	1.41991	2.89125	5.3	2.86566	C6	G4	bHLH	RNA.regulation of transcription.bHLH,Basic Helix-Loop-Helix family	AT4G34530	loc_os06g16400	CIB1 (CRYPTOCHROME-INTERACTING BASIC-HELIX-LOOP-HELIX 1); DNA binding / transcription factor	cryptochrome-interacting basic-helix-loop-helix 1	cryptochrome-interacting basic-helix-loop-helix 1 (CIB1); CONTAINS InterPro DOMAIN/s: Helix-loop-helix DNA-binding domain (InterPro:IPR001092), Helix-loop-helix DNA-binding (InterPro:IPR011598); BEST Arabidopsis thaliana protein match is: basic helix-loop-helix (bHLH) DNA-binding superfamily protein (TAIR:AT1G68920.2); Has 2243 Blast hits to 2231 proteins in 129 species: Archae - 0; Bacteria - 9;…
cassava4.1_009861m.g	62.2324	57.0142	62.3139	79.3614	37.5307	20.6563	37.2503	23.6496	13.2161	24.0335	19.9674	17.3001	C6	G4	bHLH	RNA.regulation of transcription.bHLH,Basic Helix-Loop-Helix family	AT3G57800	loc_os09g32510	basic helix-loop-helix (bHLH) family protein	basic helix-loop-helix (bHLH) DNA-binding superfamily protein	basic helix-loop-helix (bHLH) DNA-binding superfamily protein; FUNCTIONS IN: DNA binding, sequence-specific DNA binding transcription factor activity; INVOLVED IN: regulation of transcription; LOCATED IN: nucleus; EXPRESSED IN: 21 plant structures; EXPRESSED DURING: 13 growth stages; CONTAINS InterPro DOMAIN/s: Helix-loop-helix DNA-binding domain (InterPro:IPR001092), Helix-loop-helix DNA-binding…
cassava4.1_025708m.g	12.855	14.4972	29.0352	9.72068	5.45505	25.7891	5.70771	4.21964	30.255	0.542109	0.246512	0	C7	G3	bHLH	RNA.regulation of transcription.bHLH,Basic Helix-Loop-Helix family	AT2G20180	loc_os03g56950	PIL5 (PHYTOCHROME INTERACTING FACTOR 3-LIKE 5); DNA binding / phytochrome binding / transcription factor	phytochrome interacting factor 3-like 5	phytochrome interacting factor 3-like 5 (PIL5); CONTAINS InterPro DOMAIN/s: Helix-loop-helix DNA-binding domain (InterPro:IPR001092), Helix-loop-helix DNA-binding (InterPro:IPR011598); BEST Arabidopsis thaliana protein match is: basic helix-loop-helix (bHLH) DNA-binding superfamily protein (TAIR:AT4G28800.1); Has 4635 Blast hits to 4615 proteins in 348 species: Archae - 0; Bacteria - 26; Metazoa …
cassava4.1_028436m.g	15.498	19.7357	40.6492	15.6692	10.0373	29.044	6.10825	7.06544	39.5391	0.451757	0.493023	0.95522	C7	G3	bHLH	RNA.regulation of transcription.bHLH,Basic Helix-Loop-Helix family	AT2G20180		PIL5 (PHYTOCHROME INTERACTING FACTOR 3-LIKE 5); DNA binding / phytochrome binding / transcription factor	phytochrome interacting factor 3-like 5	phytochrome interacting factor 3-like 5 (PIL5); CONTAINS InterPro DOMAIN/s: Helix-loop-helix DNA-binding domain (InterPro:IPR001092), Helix-loop-helix DNA-binding (InterPro:IPR011598); BEST Arabidopsis thaliana protein match is: basic helix-loop-helix (bHLH) DNA-binding superfamily protein (TAIR:AT4G28800.1); Has 4635 Blast hits to 4615 proteins in 348 species: Archae - 0; Bacteria - 26; Metazoa …
cassava4.1_003087m.g	18.9821	58.7197	32.2737	7.97966	7.41887	18.1525	20.4276	21.9814	33.8594	10.6615	14.7907	14.859	C7	G4	bHLH	RNA.regulation of transcription.bHLH,Basic Helix-Loop-Helix family	AT4G09820	loc_os07g11020	TT8 (TRANSPARENT TESTA 8); DNA binding / transcription factor	basic helix-loop-helix (bHLH) DNA-binding superfamily protein	TRANSPARENT TESTA 8 (TT8); FUNCTIONS IN: DNA binding, sequence-specific DNA binding transcription factor activity; INVOLVED IN: trichome differentiation, regulation of flavonoid biosynthetic process, regulation of proanthocyanidin biosynthetic process; LOCATED IN: nucleus; EXPRESSED IN: stem, hypocotyl, micropylar endosperm; EXPRESSED DURING: C globular stage; CONTAINS InterPro DOMAIN/s: Helix-lo…
cassava4.1_015591m.g	10.332	17.2992	40.5376	0.145085	1.09101	1.12671	0.901217	1.17757	3.60439	0.542109	0.739535	1.16749	C7	G4	bHLH	RNA.regulation of transcription.bHLH,Basic Helix-Loop-Helix family	AT4G20970		basic helix-loop-helix (bHLH) family protein	basic helix-loop-helix (bHLH) DNA-binding superfamily protein	basic helix-loop-helix (bHLH) DNA-binding superfamily protein; FUNCTIONS IN: DNA binding, sequence-specific DNA binding transcription factor activity; INVOLVED IN: defense response to fungus, regulation of transcription; LOCATED IN: nucleus; CONTAINS InterPro DOMAIN/s: Helix-loop-helix DNA-binding domain (InterPro:IPR001092), Helix-loop-helix DNA-binding (InterPro:IPR011598); BEST Arabidopsis tha…
cassava4.1_023048m.g	14.7772	10.477	46.903	6.6739	4.47314	21.157	0.600811	1.47197	4.47818	0.180703	0.369767	0.106136	C7	G4	bHLH	RNA.regulation of transcription.bHLH,Basic Helix-Loop-Helix family	AT5G50915	loc_os09g33580	basic helix-loop-helix (bHLH) family protein	basic helix-loop-helix (bHLH) DNA-binding superfamily protein	basic helix-loop-helix (bHLH) DNA-binding superfamily protein; FUNCTIONS IN: DNA binding, sequence-specific DNA binding transcription factor activity; INVOLVED IN: response to gibberellin stimulus; LOCATED IN: nucleus; EXPRESSED IN: 23 plant structures; EXPRESSED DURING: 13 growth stages; CONTAINS InterPro DOMAIN/s: Helix-loop-helix DNA-binding domain (InterPro:IPR001092), Helix-loop-helix DNA-bi…
cassava4.1_015506m.g	5.88685	9.74601	49.8065	10.5912	14.1831	67.352	14.82	26.4954	39.5391	14.0045	7.27209	18.786	C9	G3	bHLH	RNA.regulation of transcription.bHLH,Basic Helix-Loop-Helix family	AT3G47640	loc_os07g43530	basic helix-loop-helix (bHLH) family protein	basic helix-loop-helix (bHLH) DNA-binding superfamily protein	POPEYE (PYE); FUNCTIONS IN: DNA binding, sequence-specific DNA binding transcription factor activity; INVOLVED IN: cellular response to iron ion starvation, iron ion homeostasis, regulation of transcription; LOCATED IN: nucleus, chloroplast; EXPRESSED IN: 23 plant structures; EXPRESSED DURING: 13 growth stages; CONTAINS InterPro DOMAIN/s: Helix-loop-helix DNA-binding domain (InterPro:IPR001092), …
cassava4.1_029139m.g	11.4133	11.2079	14.5176	16.2495	15.0559	15.5235	17.8241	19.5281	23.92	11.0229	17.6256	39.6947	C2	G1	bZIP	RNA.regulation of transcription.bZIP transcription factor family	AT1G43700	loc_os12g06520	VIP1 (VIRE2-INTERACTING PROTEIN 1); protein binding / transcription factor	VIRE2-interacting protein 1	VIRE2-interacting protein 1 (VIP1); FUNCTIONS IN: protein binding, sequence-specific DNA binding transcription factor activity; INVOLVED IN: cellular response to sulfate starvation, sulfate transport, DNA mediated transformation, nuclear import; LOCATED IN: nucleus; EXPRESSED IN: 23 plant structures; EXPRESSED DURING: 13 growth stages; CONTAINS InterPro DOMAIN/s: Basic-leucine zipper (bZIP) trans…
cassava4.1_011494m.g	8.65006	7.91863	5.02532	0	0	0	0	0.098131	0	35.9599	1.97209	0.106136	C4	G2	bZIP	RNA.regulation of transcription.bZIP transcription factor family	AT2G42380	loc_os01g55150	bZIP transcription factor family protein	Basic-leucine zipper (bZIP) transcription factor family protein	BZIP34; FUNCTIONS IN: DNA binding, transcription activator activity, sequence-specific DNA binding transcription factor activity; INVOLVED IN: regulation of transcription, DNA-dependent; LOCATED IN: nucleus; EXPRESSED IN: male gametophyte, flower, carpel; EXPRESSED DURING: L mature pollen stage, M germinated pollen stage, 4 anthesis, petal differentiation and expansion stage; CONTAINS InterPro DO…
cassava4.1_028474m.g	211.446	202.352	168.181	414.362	225.294	158.365	227.908	162.996	61.4931	83.304	22.5558	28.5505	C8	G5	bZIP	RNA.regulation of transcription.bZIP transcription factor family	AT1G75390	loc_os02g03960	AtbZIP44 (Arabidopsis thaliana basic leucine-zipper 44); DNA binding / protein heterodimerization/ transcription factor	basic leucine-zipper 44	basic leucine-zipper 44 (bZIP44); FUNCTIONS IN: DNA binding, protein heterodimerization activity, sequence-specific DNA binding transcription factor activity; INVOLVED IN: regulation of transcription, DNA-dependent; LOCATED IN: chloroplast; CONTAINS InterPro DOMAIN/s: Basic-leucine zipper (bZIP) transcription factor (InterPro:IPR004827), bZIP transcription factor, bZIP-1 (InterPro:IPR011616); BES…
cassava4.1_018315m.g	3.48405	2.07103	3.90858	1.8861	1.85472	3.38012	2.10284	3.33646	0.655344	85.4725	66.6814	15.1774	C3	G2	C2C2(Zn) CO-like	RNA.regulation of transcription.C2C2(Zn) CO-like, Constans-like zinc finger family				#N/A	#N/A
cassava4.1_017602m.g	12.855	12.548	64.7708	11.7519	7.52797	46.9461	10.0135	5.88786	18.1312	6.5053	1.1093	4.98837	C7	G3	C2C2(Zn) CO-like	RNA.regulation of transcription.C2C2(Zn) CO-like, Constans-like zinc finger family	AT4G38960	loc_os09g35880	zinc finger (B-box type) family protein	B-box type zinc finger family protein	B-box type zinc finger family protein; FUNCTIONS IN: sequence-specific DNA binding transcription factor activity, zinc ion binding; INVOLVED IN: regulation of transcription; LOCATED IN: endomembrane system, intracellular; EXPRESSED IN: 18 plant structures; EXPRESSED DURING: 8 growth stages; CONTAINS InterPro DOMAIN/s: Zinc finger, B-box (InterPro:IPR000315); BEST Arabidopsis thaliana protein matc…
cassava4.1_010137m.g	158.104	133.52	174.993	101.269	65.1333	130.948	51.6698	33.3646	75.6922	17.7992	18.1186	137.446	C7	G4	C2C2(Zn) CO-like	RNA.regulation of transcription.C2C2(Zn) CO-like, Constans-like zinc finger family	AT5G57660	loc_os04g42020	zinc finger (B-box type) family protein	CONSTANS-like 5	CONSTANS-like 5 (COL5); FUNCTIONS IN: sequence-specific DNA binding transcription factor activity, zinc ion binding; INVOLVED IN: regulation of transcription; LOCATED IN: intracellular; EXPRESSED IN: 23 plant structures; EXPRESSED DURING: 13 growth stages; CONTAINS InterPro DOMAIN/s: CCT domain (InterPro:IPR010402), Zinc finger, B-box (InterPro:IPR000315); BEST Arabidopsis thaliana protein match …
cassava4.1_008554m.g	16.339	20.1011	13.4008	28.5817	46.477	9.51441	34.046	36.4066	12.2331	3.79476	23.0488	8.49085	C8	G5	C2C2(Zn) CO-like	RNA.regulation of transcription.C2C2(Zn) CO-like, Constans-like zinc finger family	AT3G07650	loc_os06g19444	COL9 (CONSTANS-LIKE 9); transcription factor/ zinc ion binding	CONSTANS-like 9	CONSTANS-like 9 (COL9); CONTAINS InterPro DOMAIN/s: CCT domain (InterPro:IPR010402), Zinc finger, B-box (InterPro:IPR000315); BEST Arabidopsis thaliana protein match is: B-box type zinc finger protein with CCT domain (TAIR:AT5G48250.1); Has 3101 Blast hits to 2272 proteins in 128 species: Archae - 0; Bacteria - 0; Metazoa - 2; Fungi - 2; Plants - 3022; Viruses - 0; Other Eukaryotes - 75 (source: …
cassava4.1_009967m.g	67.7588	68.953	18.4262	113.456	141.613	46.9461	134.882	126.197	36.2623	5.33073	12.0791	7.00495	C8	G5	C2C2(Zn) CO-like	RNA.regulation of transcription.C2C2(Zn) CO-like, Constans-like zinc finger family	AT2G47890	loc_os03g22770	zinc finger (B-box type) family protein	B-box type zinc finger protein with CCT domain	B-box type zinc finger protein with CCT domain; FUNCTIONS IN: sequence-specific DNA binding transcription factor activity, zinc ion binding; INVOLVED IN: regulation of transcription; LOCATED IN: intracellular; EXPRESSED IN: stem, inflorescence meristem, root, flower, stamen; EXPRESSED DURING: 4 anthesis, petal differentiation and expansion stage; CONTAINS InterPro DOMAIN/s: CCT domain (InterPro:I…
cassava4.1_010378m.g	244.124	273.863	354.341	467.898	289.009	375.944	228.208	140.327	170.608	23.13	8.38139	51.7942	C8	G5	C2C2(Zn) CO-like	RNA.regulation of transcription.C2C2(Zn) CO-like, Constans-like zinc finger family	AT5G57660	loc_os04g42020	zinc finger (B-box type) family protein	CONSTANS-like 5	CONSTANS-like 5 (COL5); FUNCTIONS IN: sequence-specific DNA binding transcription factor activity, zinc ion binding; INVOLVED IN: regulation of transcription; LOCATED IN: intracellular; EXPRESSED IN: 23 plant structures; EXPRESSED DURING: 13 growth stages; CONTAINS InterPro DOMAIN/s: CCT domain (InterPro:IPR010402), Zinc finger, B-box (InterPro:IPR000315); BEST Arabidopsis thaliana protein match …
cassava4.1_016316m.g	13.4557	42.8825	0.89339	65.1431	103.1	7.38618	70.6955	68.6917	1.31069	0.180703	0.246512	0.424542	C8	G5	C2C2(Zn) CO-like	RNA.regulation of transcription.C2C2(Zn) CO-like, Constans-like zinc finger family	AT1G07050	loc_os02g05470	CONSTANS-like protein-related	CCT motif family protein	CCT motif family protein; CONTAINS InterPro DOMAIN/s: CCT domain (InterPro:IPR010402); BEST Arabidopsis thaliana protein match is: CCT motif family protein (TAIR:AT4G25990.1); Has 1772 Blast hits to 1772 proteins in 105 species: Archae - 0; Bacteria - 0; Metazoa - 1; Fungi - 2; Plants - 1711; Viruses - 0; Other Eukaryotes - 58 (source: NCBI BLink).
cassava4.1_027980m.g	5.04587	9.25871	2.45682	23.939	30.5483	9.6396	18.2246	24.4346	9.28404	1.26492	4.43721	1.06136	C8	G5	C2C2(Zn) CO-like	RNA.regulation of transcription.C2C2(Zn) CO-like, Constans-like zinc finger family	AT3G07650	loc_os06g19444	COL9 (CONSTANS-LIKE 9); transcription factor/ zinc ion binding	CONSTANS-like 9	CONSTANS-like 9 (COL9); CONTAINS InterPro DOMAIN/s: CCT domain (InterPro:IPR010402), Zinc finger, B-box (InterPro:IPR000315); BEST Arabidopsis thaliana protein match is: B-box type zinc finger protein with CCT domain (TAIR:AT5G48250.1); Has 3101 Blast hits to 2272 proteins in 128 species: Archae - 0; Bacteria - 0; Metazoa - 2; Fungi - 2; Plants - 3022; Viruses - 0; Other Eukaryotes - 75 (source: …
cassava4.1_028584m.g	40.1267	30.3345	6.47708	36.7064	40.1492	31.2974	25.2341	24.2384	11.4685	0.0903514	0	0.106136	C8	G5	C2C2(Zn) CO-like	RNA.regulation of transcription.C2C2(Zn) CO-like, Constans-like zinc finger family	AT1G25440	loc_os06g15330	zinc finger (B-box type) family protein	B-box type zinc finger protein with CCT domain	B-box type zinc finger protein with CCT domain; FUNCTIONS IN: sequence-specific DNA binding transcription factor activity, zinc ion binding; INVOLVED IN: regulation of transcription; LOCATED IN: membrane; EXPRESSED IN: leaf; CONTAINS InterPro DOMAIN/s: CCT domain (InterPro:IPR010402), Zinc finger, B-box (InterPro:IPR000315); BEST Arabidopsis thaliana protein match is: B-box type zinc finger prote…
cassava4.1_006065m.g	19.1022	18.1519	34.9539	9.43051	10.9101	32.5493	9.41271	9.32245	31.5657	3.343	3.45116	25.791	C7	G3	C2C2(Zn) DOF	RNA.regulation of transcription.C2C2(Zn) DOF zinc finger family	AT5G39660	loc_os01g15900	CDF2 (CYCLING DOF FACTOR 2); DNA binding / protein binding / transcription factor	cycling DOF factor 2	cycling DOF factor 2 (CDF2); CONTAINS InterPro DOMAIN/s: Zinc finger, Dof-type (InterPro:IPR003851); BEST Arabidopsis thaliana protein match is: cycling DOF factor 3 (TAIR:AT3G47500.1); Has 1150 Blast hits to 1134 proteins in 76 species: Archae - 0; Bacteria - 6; Metazoa - 18; Fungi - 6; Plants - 1095; Viruses - 0; Other Eukaryotes - 25 (source: NCBI BLink).
cassava4.1_011733m.g	52.5011	57.7451	49.5831	75.7342	56.0779	34.4271	44.7604	38.4674	9.39326	4.06581	5.3	6.04973	C8	G5	C2C2(Zn) DOF	RNA.regulation of transcription.C2C2(Zn) DOF zinc finger family	AT5G60850	loc_os02g49440	OBP4; DNA binding / transcription factor	OBF binding protein 4	OBF binding protein 4 (OBP4); CONTAINS InterPro DOMAIN/s: Zinc finger, Dof-type (InterPro:IPR003851); BEST Arabidopsis thaliana protein match is: DOF zinc finger protein 1 (TAIR:AT1G51700.1); Has 1807 Blast hits to 1807 proteins in 277 species: Archae - 0; Bacteria - 0; Metazoa - 736; Fungi - 347; Plants - 385; Viruses - 0; Other Eukaryotes - 339 (source: NCBI BLink).
cassava4.1_007172m.g	7.32853	8.04046	40.7609	32.499	10.4737	78.3687	14.82	8.24301	28.3982	4.96933	2.71163	8.38471	C9	G3	C2C2(Zn) DOF	RNA.regulation of transcription.C2C2(Zn) DOF zinc finger family	AT3G47500	loc_os07g48570	CDF3 (CYCLING DOF FACTOR 3); DNA binding / protein binding / transcription factor	cycling DOF factor 3	cycling DOF factor 3 (CDF3); CONTAINS InterPro DOMAIN/s: Zinc finger, Dof-type (InterPro:IPR003851); BEST Arabidopsis thaliana protein match is: cycling DOF factor 1 (TAIR:AT5G62430.1); Has 1160 Blast hits to 1145 proteins in 79 species: Archae - 0; Bacteria - 0; Metazoa - 13; Fungi - 10; Plants - 1084; Viruses - 0; Other Eukaryotes - 53 (source: NCBI BLink).
cassava4.1_022929m.g	2.16252	2.4365	4.46695	0	0	0	0	0.098131	0.218448	35.3274	12.6953	4.35156	C4	G2	C2C2(Zn) GATA	RNA.regulation of transcription.C2C2(Zn) GATA transcription factor family	AT2G45050	loc_os10g40810	zinc finger (GATA type) family protein	GATA transcription factor 2	GATA transcription factor 2 (GATA2); CONTAINS InterPro DOMAIN/s: Zinc finger, NHR/GATA-type (InterPro:IPR013088), Transcription factor, GATA, plant (InterPro:IPR016679), Zinc finger, GATA-type (InterPro:IPR000679); BEST Arabidopsis thaliana protein match is: GATA transcription factor 4 (TAIR:AT3G60530.1); Has 1635 Blast hits to 1600 proteins in 197 species: Archae - 0; Bacteria - 0; Metazoa - 109…
cassava4.1_010727m.g	91.3062	92.0998	79.9584	48.3132	17.6744	17.4014	12.617	14.1309	12.2331	106.524	50.2884	23.0314	C5	G4	C2C2(Zn) GATA	RNA.regulation of transcription.C2C2(Zn) GATA transcription factor family	AT3G54810	loc_os02g56250	zinc finger (GATA type) family protein	Plant-specific GATA-type zinc finger transcription factor family protein	BLUE MICROPYLAR END 3 (BME3); CONTAINS InterPro DOMAIN/s: Zinc finger, NHR/GATA-type (InterPro:IPR013088), Transcription factor, GATA, plant (InterPro:IPR016679), Zinc finger, GATA-type (InterPro:IPR000679); BEST Arabidopsis thaliana protein match is: GATA transcription factor 11 (TAIR:AT1G08010.2); Has 1480 Blast hits to 1450 proteins in 168 species: Archae - 0; Bacteria - 0; Metazoa - 58; Fungi…
cassava4.1_010811m.g	89.0236	99.8966	51.5933	44.8312	21.8202	9.88998	9.21244	11.5795	4.25973	73.7268	40.5511	23.0314	C5	G4	C2C2(Zn) GATA	RNA.regulation of transcription.C2C2(Zn) GATA transcription factor family	AT3G54810	loc_os02g56250	zinc finger (GATA type) family protein	Plant-specific GATA-type zinc finger transcription factor family protein	BLUE MICROPYLAR END 3 (BME3); CONTAINS InterPro DOMAIN/s: Zinc finger, NHR/GATA-type (InterPro:IPR013088), Transcription factor, GATA, plant (InterPro:IPR016679), Zinc finger, GATA-type (InterPro:IPR000679); BEST Arabidopsis thaliana protein match is: GATA transcription factor 11 (TAIR:AT1G08010.2); Has 1480 Blast hits to 1450 proteins in 168 species: Archae - 0; Bacteria - 0; Metazoa - 58; Fungi…
cassava4.1_012866m.g	73.886	73.826	48.0197	100.979	71.6794	47.4468	40.2544	49.9487	15.0729	0.0903514	0.369767	0.212271	C8	G5	C2C2(Zn) GATA	RNA.regulation of transcription.C2C2(Zn) GATA transcription factor family				#N/A	#N/A
cassava4.1_031585m.g	56.9463	45.319	44.7812	59.3397	47.4589	33.9264	28.9391	34.1496	9.17481	0.0903514	0.123256	0.106136	C8	G5	C2C2(Zn) GATA	RNA.regulation of transcription.C2C2(Zn) GATA transcription factor family	AT4G26150		CGA1 (CYTOKININ-RESPONSIVE GATA FACTOR 1); transcription factor	cytokinin-responsive gata factor 1	cytokinin-responsive gata factor 1 (CGA1); CONTAINS InterPro DOMAIN/s: Zinc finger, NHR/GATA-type (InterPro:IPR013088), Zinc finger, GATA-type (InterPro:IPR000679); BEST Arabidopsis thaliana protein match is: GATA type zinc finger transcription factor family protein (TAIR:AT5G56860.1); Has 1630 Blast hits to 1587 proteins in 190 species: Archae - 0; Bacteria - 0; Metazoa - 106; Fungi - 659; Plant…
cassava4.1_014707m.g	2.76322	5.36031	2.5685	10.1559	12.983	10.0152	11.115	13.444	110.972	147.996	309.865	286.142	C1	G1	C2H2	RNA.regulation of transcription.C2H2 zinc finger family	AT3G19580	loc_os03g32220	AZF2 (ARABIDOPSIS ZINC-FINGER PROTEIN 2); DNA binding / nucleic acid binding / transcription factor/ transcription repressor/ zinc ion binding	zinc-finger protein 2	zinc-finger protein 2 (ZF2); CONTAINS InterPro DOMAIN/s: Zinc finger, C2H2-like (InterPro:IPR015880), Zinc finger, C2H2-type (InterPro:IPR007087); BEST Arabidopsis thaliana protein match is: salt tolerance zinc finger (TAIR:AT1G27730.1); Has 3838 Blast hits to 3100 proteins in 116 species: Archae - 0; Bacteria - 0; Metazoa - 2857; Fungi - 6; Plants - 884; Viruses - 0; Other Eukaryotes - 91 (sourc…
cassava4.1_005470m.g	12.014	11.6952	18.9845	14.2183	14.6195	39.0591	22.931	21.4907	68.3742	47.6152	59.9023	52.0064	C10	G6	C2H2	RNA.regulation of transcription.C2H2 zinc finger family	AT1G34370	loc_os01g65080	STOP1 (sensitive to proton rhizotoxicity 1); nucleic acid binding / transcription factor/ zinc ion binding	C2H2 and C2HC zinc fingers superfamily protein	sensitive to proton rhizotoxicity 1 (STOP1); CONTAINS InterPro DOMAIN/s: Zinc finger, C2H2-like (InterPro:IPR015880), Zinc finger, C2H2-type (InterPro:IPR007087); BEST Arabidopsis thaliana protein match is: C2H2 and C2HC zinc fingers superfamily protein (TAIR:AT5G22890.1); Has 25295 Blast hits to 14002 proteins in 194 species: Archae - 0; Bacteria - 2; Metazoa - 23814; Fungi - 97; Plants - 697; V…
cassava4.1_005519m.g	49.2573	51.0447	74.7097	35.1105	37.4216	37.9324	36.1488	47.6917	131.287	31.623	40.0581	62.7261	C10	G6	C2H2	RNA.regulation of transcription.C2H2 zinc finger family	AT5G66730	loc_os03g10140	zinc finger (C2H2 type) family protein	C2H2-like zinc finger protein	C2H2-like zinc finger protein; FUNCTIONS IN: sequence-specific DNA binding transcription factor activity, zinc ion binding, nucleic acid binding; INVOLVED IN: regulation of transcription; LOCATED IN: intracellular; EXPRESSED IN: 22 plant structures; EXPRESSED DURING: 13 growth stages; CONTAINS InterPro DOMAIN/s: Zinc finger, C2H2-like (InterPro:IPR015880), Zinc finger, C2H2-type (InterPro:IPR0070…
cassava4.1_011448m.g	0.360419	7.06586	25.1266	7.54441	2.83663	4.13126	4.20568	10.4019	37.0269	0.542109	0	0	C10	G6	C2H2	RNA.regulation of transcription.C2H2 zinc finger family	AT3G57670	loc_os06g40960	NTT (NO TRANSMITTING TRACT); nucleic acid binding / transcription factor/ zinc ion binding	C2H2-type zinc finger family protein	NO TRANSMITTING TRACT (NTT); CONTAINS InterPro DOMAIN/s: Zinc finger, C2H2-like (InterPro:IPR015880), Zinc finger, C2H2-type (InterPro:IPR007087); BEST Arabidopsis thaliana protein match is: WIP domain protein 4 (TAIR:AT3G20880.1); Has 16303 Blast hits to 11155 proteins in 263 species: Archae - 2; Bacteria - 36; Metazoa - 14565; Fungi - 231; Plants - 853; Viruses - 60; Other Eukaryotes - 556 (sou…
cassava4.1_031586m.g	7.92923	12.1825	12.9542	5.36814	4.25494	13.6457	3.705	3.82711	32.1118	6.68601	2.34186	5.51905	C10	G6	C2H2	RNA.regulation of transcription.C2H2 zinc finger family	AT5G04390	loc_os05g02390	zinc finger (C2H2 type) family protein	C2H2-type zinc finger family protein	C2H2-type zinc finger family protein; FUNCTIONS IN: zinc ion binding, nucleic acid binding; INVOLVED IN: biological_process unknown; LOCATED IN: intracellular; EXPRESSED IN: petal, leaf whorl, male gametophyte, flower, pollen tube; EXPRESSED DURING: L mature pollen stage, M germinated pollen stage, 4 anthesis, petal differentiation and expansion stage; CONTAINS InterPro DOMAIN/s: Zinc finger, C2H…
cassava4.1_010028m.g	63.1935	67.4911	111.115	36.1261	56.6234	61.0925	38.7523	37.2898	46.6386	40.8388	228.023	267.143	C2	G1	C3H	RNA.regulation of transcription.C3H zinc finger family	AT4G29190	loc_os01g09620	zinc finger (CCCH-type) family protein	Zinc finger C-x8-C-x5-C-x3-H type family protein	Zinc finger C-x8-C-x5-C-x3-H type family protein; CONTAINS InterPro DOMAIN/s: Zinc finger, CCCH-type (InterPro:IPR000571); BEST Arabidopsis thaliana protein match is: CCCH-type zinc finger family protein (TAIR:AT2G19810.1); Has 726 Blast hits to 700 proteins in 125 species: Archae - 0; Bacteria - 0; Metazoa - 157; Fungi - 3; Plants - 406; Viruses - 0; Other Eukaryotes - 160 (source: NCBI BLink).
cassava4.1_010032m.g	43.4906	36.3039	75.0448	10.4461	15.0559	15.8991	5.50744	6.28039	8.1918	42.5555	97.0023	145.512	C2	G1	C3H	RNA.regulation of transcription.C3H zinc finger family	AT2G19810	loc_os01g09620	zinc finger (CCCH-type) family protein	CCCH-type zinc finger family protein	CCCH-type zinc finger family protein; CONTAINS InterPro DOMAIN/s: Zinc finger, CCCH-type (InterPro:IPR000571); BEST Arabidopsis thaliana protein match is: Zinc finger C-x8-C-x5-C-x3-H type family protein (TAIR:AT4G29190.1); Has 721 Blast hits to 690 proteins in 126 species: Archae - 0; Bacteria - 0; Metazoa - 152; Fungi - 6; Plants - 412; Viruses - 0; Other Eukaryotes - 151 (source: NCBI BLink).
cassava4.1_009488m.g	34.1197	29.8472	94.141	59.6298	97.209	168.756	67.1907	72.7151	54.7212	47.8863	69.2697	146.679	C2	G3	C3H	RNA.regulation of transcription.C3H zinc finger family	AT2G19810	loc_os01g09620	zinc finger (CCCH-type) family protein	CCCH-type zinc finger family protein	CCCH-type zinc finger family protein; CONTAINS InterPro DOMAIN/s: Zinc finger, CCCH-type (InterPro:IPR000571); BEST Arabidopsis thaliana protein match is: Zinc finger C-x8-C-x5-C-x3-H type family protein (TAIR:AT4G29190.1); Has 721 Blast hits to 690 proteins in 126 species: Archae - 0; Bacteria - 0; Metazoa - 152; Fungi - 6; Plants - 412; Viruses - 0; Other Eukaryotes - 151 (source: NCBI BLink).
cassava4.1_009450m.g	31.5968	34.111	190.85	43.5254	51.2775	111.669	37.6508	31.9907	47.6216	8.58339	7.64186	17.6185	C7	G3	C3H	RNA.regulation of transcription.C3H zinc finger family	AT2G19810	loc_os01g09620	zinc finger (CCCH-type) family protein	CCCH-type zinc finger family protein	CCCH-type zinc finger family protein; CONTAINS InterPro DOMAIN/s: Zinc finger, CCCH-type (InterPro:IPR000571); BEST Arabidopsis thaliana protein match is: Zinc finger C-x8-C-x5-C-x3-H type family protein (TAIR:AT4G29190.1); Has 721 Blast hits to 690 proteins in 126 species: Archae - 0; Bacteria - 0; Metazoa - 152; Fungi - 6; Plants - 412; Viruses - 0; Other Eukaryotes - 151 (source: NCBI BLink).
cassava4.1_024923m.g	30.0349	15.2281	3.01519	0.580339	0.763707	1.12671	1.00135	0.392524	0.54612	13.5527	2.58837	3.2902	C5	G4	CPP(Zn)	RNA.regulation of transcription.CPP(Zn),CPP1-related transcription factor family	AT4G14770	loc_os07g07974	TCX2 (TESMIN/TSO1-LIKE CXC 2); transcription factor	TESMIN/TSO1-like CXC 2	TESMIN/TSO1-like CXC 2 (TCX2); FUNCTIONS IN: sequence-specific DNA binding transcription factor activity; INVOLVED IN: regulation of transcription; LOCATED IN: chloroplast; EXPRESSED IN: 16 plant structures; EXPRESSED DURING: 9 growth stages; CONTAINS InterPro DOMAIN/s: Tesmin/TSO1-like, CXC (InterPro:IPR005172); BEST Arabidopsis thaliana protein match is: Tesmin/TSO1-like CXC domain-containing p…
cassava4.1_002257m.g	92.5076	65.4201	28.8118	2.90169	1.85472	1.2519	1.20162	1.37383	0.873792	22.3168	9.86046	6.47427	C6	G4	CPP(Zn)	RNA.regulation of transcription.CPP(Zn),CPP1-related transcription factor family	AT4G14770	loc_os07g07974	TCX2 (TESMIN/TSO1-LIKE CXC 2); transcription factor	TESMIN/TSO1-like CXC 2	TESMIN/TSO1-like CXC 2 (TCX2); FUNCTIONS IN: sequence-specific DNA binding transcription factor activity; INVOLVED IN: regulation of transcription; LOCATED IN: chloroplast; EXPRESSED IN: 16 plant structures; EXPRESSED DURING: 9 growth stages; CONTAINS InterPro DOMAIN/s: Tesmin/TSO1-like, CXC (InterPro:IPR005172); BEST Arabidopsis thaliana protein match is: Tesmin/TSO1-like CXC domain-containing p…
cassava4.1_008485m.g	5.64657	6.82221	2.68017	16.1044	18.6563	13.2701	13.2178	14.5234	8.84714	11.2036	42.7698	24.7296	C1	G1	G2-like	RNA.regulation of transcription.G2-like transcription factor family, GARP	AT5G06800	loc_os04g56990	myb family transcription factor	myb-like HTH transcriptional regulator family protein	myb-like HTH transcriptional regulator family protein; CONTAINS InterPro DOMAIN/s: Homeodomain-like (InterPro:IPR009057), Myb, DNA-binding (InterPro:IPR014778), HTH transcriptional regulator, Myb-type, DNA-binding (InterPro:IPR017930), Myb-like DNA-binding domain, SHAQKYF class (InterPro:IPR006447), Homeodomain-related (InterPro:IPR012287); BEST Arabidopsis thaliana protein match is: Homeodomain-…
cassava4.1_033004m.g	0	0	0	0	0.109101	0	0.100135	0.098131	0.218448	2.89125	41.4139	17.7246	C1	G1	G2-like	RNA.regulation of transcription.G2-like transcription factor family, GARP	AT2G01060	loc_os05g41240	myb family transcription factor	myb-like HTH transcriptional regulator family protein	myb-like HTH transcriptional regulator family protein; CONTAINS InterPro DOMAIN/s: Homeodomain-like (InterPro:IPR009057), Myb, DNA-binding (InterPro:IPR014778), Myb-like DNA-binding domain, SHAQKYF class (InterPro:IPR006447), HTH transcriptional regulator, Myb-type, DNA-binding (InterPro:IPR017930), Homeodomain-related (InterPro:IPR012287); BEST Arabidopsis thaliana protein match is: Homeodomain-…
cassava4.1_034089m.g	0.12014	0	0	0	0	0	0.100135	0	0	5.15003	58.4232	28.2321	C1	G1	G2-like	RNA.regulation of transcription.G2-like transcription factor family, GARP	AT3G13040	loc_os06g49040	myb family transcription factor	myb-like HTH transcriptional regulator family protein	myb-like HTH transcriptional regulator family protein; CONTAINS InterPro DOMAIN/s: Homeodomain-like (InterPro:IPR009057), Myb, DNA-binding (InterPro:IPR014778), HTH transcriptional regulator, Myb-type, DNA-binding (InterPro:IPR017930), Myb-like DNA-binding domain, SHAQKYF class (InterPro:IPR006447), Homeodomain-related (InterPro:IPR012287); BEST Arabidopsis thaliana protein match is: phosphate st…
cassava4.1_009038m.g	18.021	12.548	21.8881	14.9437	15.7105	45.9446	24.1326	28.9487	72.3063	32.9783	59.286	42.9849	C10	G6	G2-like	RNA.regulation of transcription.G2-like transcription factor family, GARP	AT1G25550	loc_os02g22020	myb family transcription factor	myb-like transcription factor family protein	myb-like transcription factor family protein; CONTAINS InterPro DOMAIN/s: Homeodomain-like (InterPro:IPR009057), Myb, DNA-binding (InterPro:IPR014778), Myb-like DNA-binding domain, SHAQKYF class (InterPro:IPR006447), HTH transcriptional regulator, Myb-type, DNA-binding (InterPro:IPR017930), Homeodomain-related (InterPro:IPR012287); BEST Arabidopsis thaliana protein match is: myb-like transcriptio…
cassava4.1_007384m.g	318.611	216.361	221.449	127.094	62.1876	212.447	66.3896	58.6824	221.834	2.34914	1.35581	6.68654	C6	G4	G2-like	RNA.regulation of transcription.G2-like transcription factor family, GARP	AT2G20570	loc_os06g24070	GPRI1 (GBF'S PRO-RICH REGION-INTERACTING FACTOR 1); transcription factor/ transcription regulator	GBF's pro-rich region-interacting factor 1	GBF's pro-rich region-interacting factor 1 (GPRI1); CONTAINS InterPro DOMAIN/s: Homeodomain-like (InterPro:IPR009057), Myb, DNA-binding (InterPro:IPR014778), Myb-like DNA-binding domain, SHAQKYF class (InterPro:IPR006447), HTH transcriptional regulator, Myb-type, DNA-binding (InterPro:IPR017930), Homeodomain-related (InterPro:IPR012287); BEST Arabidopsis thaliana protein match is: GOLDEN2-like 2 …
cassava4.1_011601m.g	9.13062	18.1519	3.68523	25.0997	37.4216	3.25493	30.9418	30.8131	5.0243	7.22811	21.693	7.42949	C8	G5	G2-like	RNA.regulation of transcription.G2-like transcription factor family, GARP	AT3G46640	loc_os01g74020	PCL1 (PHYTOCLOCK 1); DNA binding / transcription factor	Homeodomain-like superfamily protein	PHYTOCLOCK 1 (PCL1); CONTAINS InterPro DOMAIN/s: Homeodomain-like (InterPro:IPR009057), Myb, DNA-binding (InterPro:IPR014778), Myb-like DNA-binding domain, SHAQKYF class (InterPro:IPR006447), HTH transcriptional regulator, Myb-type, DNA-binding (InterPro:IPR017930), Homeodomain-related (InterPro:IPR012287); BEST Arabidopsis thaliana protein match is: Homeodomain-like superfamily protein (TAIR:AT5…
cassava4.1_023504m.g	4.80559	3.4111	3.79691	5.36814	10.5828	9.26403	8.31122	11.0888	6.99033	13.6431	46.9604	22.713	C1	G1	GRAS	RNA.regulation of transcription.GRAS transcription factor family	AT1G50420	loc_os01g71970	SCL3; transcription factor	scarecrow-like 3	scarecrow-like 3 (SCL3); CONTAINS InterPro DOMAIN/s: Transcription factor GRAS (InterPro:IPR005202); BEST Arabidopsis thaliana protein match is: SCARECROW-like 21 (TAIR:AT2G04890.1); Has 3106 Blast hits to 2488 proteins in 309 species: Archae - 0; Bacteria - 6; Metazoa - 0; Fungi - 0; Plants - 3100; Viruses - 0; Other Eukaryotes - 0 (source: NCBI BLink).
cassava4.1_025745m.g	0	0	0	0	0	0	0	0	0	2.16843	38.5791	14.9651	C1	G1	GRAS	RNA.regulation of transcription.GRAS transcription factor family	AT1G66350	loc_os03g49990	RGL1 (RGA-LIKE 1); transcription factor	RGA-like 1	RGA-like 1 (RGL1); CONTAINS InterPro DOMAIN/s: Transcriptional factor DELLA, N-terminal (InterPro:IPR021914), Transcription factor GRAS (InterPro:IPR005202); BEST Arabidopsis thaliana protein match is: RGA-like 2 (TAIR:AT3G03450.1); Has 2708 Blast hits to 2634 proteins in 311 species: Archae - 0; Bacteria - 4; Metazoa - 0; Fungi - 0; Plants - 2704; Viruses - 0; Other Eukaryotes - 0 (source: NCBI …
cassava4.1_028139m.g	0	0	0	0.290169	0	0	0	0.098131	0	2.25879	30.5674	15.7081	C1	G1	GRAS	RNA.regulation of transcription.GRAS transcription factor family	AT1G66350	loc_os11g31100	RGL1 (RGA-LIKE 1); transcription factor	RGA-like 1	RGA-like 1 (RGL1); CONTAINS InterPro DOMAIN/s: Transcriptional factor DELLA, N-terminal (InterPro:IPR021914), Transcription factor GRAS (InterPro:IPR005202); BEST Arabidopsis thaliana protein match is: RGA-like 2 (TAIR:AT3G03450.1); Has 2708 Blast hits to 2634 proteins in 311 species: Archae - 0; Bacteria - 4; Metazoa - 0; Fungi - 0; Plants - 2704; Viruses - 0; Other Eukaryotes - 0 (source: NCBI …
cassava4.1_031685m.g	0.12014	0	0	0.290169	0	0	0	0	0	5.69214	125.844	28.975	C1	G1	GRAS	RNA.regulation of transcription.GRAS transcription factor family	AT1G66350	loc_os01g67650	RGL1 (RGA-LIKE 1); transcription factor	RGA-like 1	RGA-like 1 (RGL1); CONTAINS InterPro DOMAIN/s: Transcriptional factor DELLA, N-terminal (InterPro:IPR021914), Transcription factor GRAS (InterPro:IPR005202); BEST Arabidopsis thaliana protein match is: RGA-like 2 (TAIR:AT3G03450.1); Has 2708 Blast hits to 2634 proteins in 311 species: Archae - 0; Bacteria - 4; Metazoa - 0; Fungi - 0; Plants - 2704; Viruses - 0; Other Eukaryotes - 0 (source: NCBI …
cassava4.1_032757m.g	0.961118	0.121825	0	0	0	0.12519	0.20027	0	0	14.8176	97.6186	56.8887	C1	G1	GRAS	RNA.regulation of transcription.GRAS transcription factor family	AT1G66350	loc_os11g31100	RGL1 (RGA-LIKE 1); transcription factor	RGA-like 1	RGA-like 1 (RGL1); CONTAINS InterPro DOMAIN/s: Transcriptional factor DELLA, N-terminal (InterPro:IPR021914), Transcription factor GRAS (InterPro:IPR005202); BEST Arabidopsis thaliana protein match is: RGA-like 2 (TAIR:AT3G03450.1); Has 2708 Blast hits to 2634 proteins in 311 species: Archae - 0; Bacteria - 4; Metazoa - 0; Fungi - 0; Plants - 2704; Viruses - 0; Other Eukaryotes - 0 (source: NCBI …
cassava4.1_024370m.g	0.360419	0.121825	0	0.290169	0.436404	0.250379	0.400541	0.686917	0.655344	8.04128	31.4302	36.2984	C2	G1	GRAS	RNA.regulation of transcription.GRAS transcription factor family	AT3G03450	loc_os05g49930	RGL2 (RGA-LIKE 2); transcription factor	RGA-like 2	RGA-like 2 (RGL2); CONTAINS InterPro DOMAIN/s: Transcriptional factor DELLA, N-terminal (InterPro:IPR021914), Transcription factor GRAS (InterPro:IPR005202); BEST Arabidopsis thaliana protein match is: RGA-like protein 3 (TAIR:AT5G17490.1); Has 2697 Blast hits to 2637 proteins in 314 species: Archae - 0; Bacteria - 4; Metazoa - 0; Fungi - 0; Plants - 2690; Viruses - 0; Other Eukaryotes - 3 (sourc…
cassava4.1_029854m.g	20.7842	7.30951	24.1215	3.04678	3.16393	2.75417	2.70365	6.67291	3.71361	14.3659	34.5116	79.9201	C2	G1	GRAS	RNA.regulation of transcription.GRAS transcription factor family	AT3G49950	loc_os05g42130	scarecrow transcription factor family protein	GRAS family transcription factor	GRAS family transcription factor; CONTAINS InterPro DOMAIN/s: Transcription factor GRAS (InterPro:IPR005202); BEST Arabidopsis thaliana protein match is: GRAS family transcription factor (TAIR:AT5G67411.1); Has 2188 Blast hits to 2164 proteins in 278 species: Archae - 0; Bacteria - 2; Metazoa - 0; Fungi - 0; Plants - 2186; Viruses - 0; Other Eukaryotes - 0 (source: NCBI BLink).
cassava4.1_009548m.g	5.16601	7.18768	10.1623	11.7519	16.5834	24.0364	20.027	14.8178	18.3496	25.7502	44.8651	13.3731	C3	G2	GRAS	RNA.regulation of transcription.GRAS transcription factor family	AT5G48150	loc_os07g36170	PAT1 (phytochrome a signal transduction 1); signal transducer/ transcription factor	GRAS family transcription factor	phytochrome a signal transduction 1 (PAT1); CONTAINS InterPro DOMAIN/s: Transcription factor GRAS (InterPro:IPR005202); BEST Arabidopsis thaliana protein match is: SCARECROW-like 21 (TAIR:AT2G04890.1); Has 1807 Blast hits to 1807 proteins in 277 species: Archae - 0; Bacteria - 0; Metazoa - 736; Fungi - 347; Plants - 385; Viruses - 0; Other Eukaryotes - 339 (source: NCBI BLink).
cassava4.1_001737m.g	58.1477	23.7559	30.0402	1.59593	1.85472	1.62746	0.600811	0.686917	1.74758	36.1406	7.14883	8.06631	C5	G4	GRAS	RNA.regulation of transcription.GRAS transcription factor family	AT3G54220	loc_os11g03110	SCR (SCARECROW); protein binding / protein homodimerization/ sequence-specific DNA binding / transcription factor	GRAS family transcription factor	SCARECROW (SCR); CONTAINS InterPro DOMAIN/s: Transcription factor GRAS (InterPro:IPR005202); BEST Arabidopsis thaliana protein match is: GRAS family transcription factor (TAIR:AT5G41920.1); Has 4362 Blast hits to 4213 proteins in 491 species: Archae - 0; Bacteria - 22; Metazoa - 838; Fungi - 368; Plants - 2661; Viruses - 19; Other Eukaryotes - 454 (source: NCBI BLink).
cassava4.1_011576m.g	14.0564	10.9643	35.0656	13.7831	15.6014	27.0409	18.7253	14.1309	10.4855	59.9933	186.239	140.311	C1	G1	HAP2	RNA.regulation of transcription.CCAAT box binding factor family, HAP2	AT1G72830	loc_os03g07880	NF-YA3 (NUCLEAR FACTOR Y, SUBUNIT A3); transcription factor	nuclear factor Y, subunit A3	nuclear factor Y, subunit A3 (NF-YA3); FUNCTIONS IN: sequence-specific DNA binding transcription factor activity; INVOLVED IN: regulation of transcription, DNA-dependent; LOCATED IN: CCAAT-binding factor complex; EXPRESSED IN: 16 plant structures; EXPRESSED DURING: 8 growth stages; CONTAINS InterPro DOMAIN/s: CCAAT-binding transcription factor, subunit B (InterPro:IPR001289), CCAAT-binding factor…
cassava4.1_012637m.g	41.2079	38.6186	51.1466	13.638	6.43696	14.3968	9.31257	7.75235	6.66266	36.8634	166.149	54.9782	C1	G1	HAP2	RNA.regulation of transcription.CCAAT box binding factor family, HAP2	AT5G06510	loc_os12g42400	NF-YA10 (NUCLEAR FACTOR Y, SUBUNIT A10); transcription factor	nuclear factor Y, subunit A10	nuclear factor Y, subunit A10 (NF-YA10); FUNCTIONS IN: sequence-specific DNA binding transcription factor activity; INVOLVED IN: regulation of transcription, DNA-dependent; LOCATED IN: CCAAT-binding factor complex, nucleus; EXPRESSED IN: stem, vascular tissue, embryo, leaf whorl, seed; EXPRESSED DURING: F mature embryo stage, E expanded cotyledon stage, D bilateral stage; CONTAINS InterPro DOMAIN…
cassava4.1_010819m.g	12.1341	14.0099	20.1013	20.7471	28.9118	34.4271	32.5439	32.4814	58.4348	20.1484	83.5674	83.5287	C2	G1	HAP2	RNA.regulation of transcription.CCAAT box binding factor family, HAP2	AT5G12840	loc_os03g48970	NF-YA1 (NUCLEAR FACTOR Y, SUBUNIT A1); transcription factor	nuclear factor Y, subunit A1	nuclear factor Y, subunit A1 (NF-YA1); CONTAINS InterPro DOMAIN/s: CCAAT-binding transcription factor, subunit B (InterPro:IPR001289), CCAAT-binding factor, conserved site (InterPro:IPR018362); BEST Arabidopsis thaliana protein match is: nuclear factor Y, subunit A9 (TAIR:AT3G20910.1); Has 30201 Blast hits to 17322 proteins in 780 species: Archae - 12; Bacteria - 1396; Metazoa - 17338; Fungi - 34…
cassava4.1_012382m.g	4.32503	6.21308	35.2889	5.94847	23.6749	33.3004	6.80919	12.1683	13.9807	9.57725	33.6488	53.0678	C2	G1	HAP2	RNA.regulation of transcription.CCAAT box binding factor family, HAP2	AT3G20910	loc_os03g48970	NF-YA9 (NUCLEAR FACTOR Y, SUBUNIT A9); specific transcriptional repressor/ transcription factor	nuclear factor Y, subunit A9	nuclear factor Y, subunit A9 (NF-YA9); FUNCTIONS IN: sequence-specific DNA binding transcription factor activity, specific transcriptional repressor activity; INVOLVED IN: negative regulation of gene-specific transcription, regulation of transcription, DNA-dependent; LOCATED IN: CCAAT-binding factor complex, nucleus; EXPRESSED IN: 16 plant structures; EXPRESSED DURING: 9 growth stages; CONTAINS I…
cassava4.1_026597m.g	12.2543	14.9845	3.68523	94.4502	48.3317	35.9294	62.985	56.5235	16.3836	39.9353	25.5139	36.1922	C8	G5	HAP2	RNA.regulation of transcription.CCAAT box binding factor family, HAP3	AT5G47640	loc_os08g07740	NF-YB2 (NUCLEAR FACTOR Y, SUBUNIT B2); transcription factor	nuclear factor Y, subunit B2	nuclear factor Y, subunit B2 (NF-YB2); FUNCTIONS IN: sequence-specific DNA binding transcription factor activity; INVOLVED IN: regulation of transcription, DNA-dependent; LOCATED IN: nucleus, intracellular; EXPRESSED IN: 23 plant structures; EXPRESSED DURING: 13 growth stages; CONTAINS InterPro DOMAIN/s: Transcription factor, CBFA/NFYB, DNA topoisomerase (InterPro:IPR003957), Transcription factor…
cassava4.1_010584m.g	27.6322	15.9591	18.0911	2.61153	3.05483	2.25341	1.7023	1.47197	1.85681	10.7518	33.2791	24.4112	C1	G1	HB	RNA.regulation of transcription.HB,Homeobox transcription factor family	AT5G06710	loc_os08g36220	HAT14 (HOMEOBOX FROM ARABIDOPSIS THALIANA); DNA binding / transcription factor	homeobox from Arabidopsis thaliana	homeobox from Arabidopsis thaliana (HAT14); FUNCTIONS IN: DNA binding, sequence-specific DNA binding transcription factor activity; INVOLVED IN: regulation of transcription, DNA-dependent, regulation of transcription; LOCATED IN: nucleus; EXPRESSED IN: 18 plant structures; EXPRESSED DURING: 9 growth stages; CONTAINS InterPro DOMAIN/s: Homeobox, conserved site (InterPro:IPR017970), Homeobox (Inter…
cassava4.1_026937m.g	0.24028	0.487301	0.111674	0	0	0.12519	0	0	0	19.9677	61.2581	23.7744	C1	G1	HB	RNA.regulation of transcription.HB,Homeobox transcription factor family	AT2G18550	loc_os07g39320	HB-2 (HOMEOBOX-2); DNA binding / transcription factor	homeobox protein 21	homeobox protein 21 (HB21); FUNCTIONS IN: DNA binding, sequence-specific DNA binding transcription factor activity; INVOLVED IN: regulation of transcription, DNA-dependent, regulation of transcription; LOCATED IN: nucleus; EXPRESSED IN: 21 plant structures; EXPRESSED DURING: 13 growth stages; CONTAINS InterPro DOMAIN/s: Homeobox, conserved site (InterPro:IPR017970), Homeobox (InterPro:IPR001356),…
cassava4.1_012777m.g	11.8938	14.619	36.964	62.2414	72.1158	81.248	87.2178	82.7245	245.645	37.9476	44.8651	65.3795	C10	G6	HB	RNA.regulation of transcription.HB,Homeobox transcription factor family	AT3G01470	loc_os09g29460	ATHB-1 (ARABIDOPSIS THALIANA HOMEOBOX 1); DNA binding / protein homodimerization/ sequence-specific DNA binding / transcription activator/ transcription factor	homeobox 1	homeobox 1 (HB-1); FUNCTIONS IN: sequence-specific DNA binding, DNA binding, transcription activator activity, protein homodimerization activity, sequence-specific DNA binding transcription factor activity; INVOLVED IN: response to salt stress, response to blue light, positive regulation of transcription, regulation of transcription, DNA-dependent, leaf morphogenesis; LOCATED IN: nucleus; EXPRESS…
cassava4.1_015049m.g	8.52993	15.1063	34.6189	23.2136	59.5691	70.8573	46.0622	82.8226	306.155	4.06581	54.4791	123.117	C10	G6	HB	RNA.regulation of transcription.HB,Homeobox transcription factor family	AT2G46680	loc_os09g35910	ATHB-7 (ARABIDOPSIS THALIANA HOMEOBOX 7); transcription activator/ transcription factor	homeobox 7	homeobox 7 (HB-7); FUNCTIONS IN: transcription activator activity, sequence-specific DNA binding transcription factor activity; INVOLVED IN: response to water deprivation, abscisic acid mediated signaling pathway, regulation of transcription, DNA-dependent, response to abscisic acid stimulus; LOCATED IN: nucleus; EXPRESSED IN: 21 plant structures; EXPRESSED DURING: 6 growth stages; CONTAINS Inter…
cassava4.1_015051m.g	1.32154	2.07103	6.14206	5.65831	7.20067	8.01213	4.80649	15.3084	76.3475	6.1439	9.61395	15.8142	C10	G6	HB	RNA.regulation of transcription.HB,Homeobox transcription factor family	AT3G61890	loc_os09g35910	ATHB-12 (ARABIDOPSIS THALIANA HOMEOBOX 12); transcription activator/ transcription factor	homeobox 12	homeobox 12 (HB-12); CONTAINS InterPro DOMAIN/s: Homeobox, conserved site (InterPro:IPR017970), Homeobox (InterPro:IPR001356), Homeodomain-like (InterPro:IPR009057), Helix-turn-helix motif, lambda-like repressor (InterPro:IPR000047), Leucine zipper, homeobox-associated (InterPro:IPR003106), Homeodomain-related (InterPro:IPR012287); BEST Arabidopsis thaliana protein match is: homeobox 7 (TAIR:AT2G…
cassava4.1_023294m.g	17.9008	26.1924	18.8729	26.9858	25.8569	32.7997	22.23	31.8926	201.409	16.2633	38.2093	33.7511	C10	G6	HB	RNA.regulation of transcription.HB,Homeobox transcription factor family	AT5G25220	loc_os08g19650	KNAT3 (KNOTTED1-LIKE HOMEOBOX GENE 3); transcription activator/ transcription factor	KNOTTED1-like homeobox gene 3	KNOTTED1-like homeobox gene 3 (KNAT3); FUNCTIONS IN: transcription activator activity, sequence-specific DNA binding transcription factor activity; INVOLVED IN: response to light stimulus, detection of cytokinin stimulus, cellular response to cytokine stimulus; LOCATED IN: cytosol, nucleus; EXPRESSED IN: 35 plant structures; EXPRESSED DURING: 13 growth stages; CONTAINS InterPro DOMAIN/s: ELK (Int…
cassava4.1_014981m.g	7.56881	12.4262	19.2079	11.1715	55.3142	55.9597	34.1461	49.7524	102.561	5.51144	131.267	201.976	C2	G1	HB	RNA.regulation of transcription.HB,Homeobox transcription factor family	AT2G46680	loc_os09g35910	ATHB-7 (ARABIDOPSIS THALIANA HOMEOBOX 7); transcription activator/ transcription factor	homeobox 7	homeobox 7 (HB-7); FUNCTIONS IN: transcription activator activity, sequence-specific DNA binding transcription factor activity; INVOLVED IN: response to water deprivation, abscisic acid mediated signaling pathway, regulation of transcription, DNA-dependent, response to abscisic acid stimulus; LOCATED IN: nucleus; EXPRESSED IN: 21 plant structures; EXPRESSED DURING: 6 growth stages; CONTAINS Inter…
cassava4.1_013285m.g	43.3705	41.5424	97.7145	25.8251	12.6557	11.3923	5.60757	7.75235	7.20878	92.9716	16.2698	21.121	C5	G4	HB	RNA.regulation of transcription.HB,Homeobox transcription factor family	AT1G69780	loc_os03g07450	ATHB13; DNA binding / sequence-specific DNA binding / transcription factor	Homeobox-leucine zipper protein family	ATHB13; FUNCTIONS IN: sequence-specific DNA binding, DNA binding, sequence-specific DNA binding transcription factor activity; INVOLVED IN: cotyledon morphogenesis, regulation of transcription, DNA-dependent, response to sucrose stimulus, leaf morphogenesis; LOCATED IN: nucleus; EXPRESSED IN: 22 plant structures; EXPRESSED DURING: 13 growth stages; CONTAINS InterPro DOMAIN/s: Homeobox, conserved …
cassava4.1_014818m.g	14.1765	23.3904	61.6439	27.421	11.1283	11.893	8.11095	12.9533	8.62869	15.7211	4.31395	3.07793	C7	G4	HB	RNA.regulation of transcription.HB,Homeobox transcription factor family	AT1G69780	loc_os03g07450	ATHB13; DNA binding / sequence-specific DNA binding / transcription factor	Homeobox-leucine zipper protein family	ATHB13; FUNCTIONS IN: sequence-specific DNA binding, DNA binding, sequence-specific DNA binding transcription factor activity; INVOLVED IN: cotyledon morphogenesis, regulation of transcription, DNA-dependent, response to sucrose stimulus, leaf morphogenesis; LOCATED IN: nucleus; EXPRESSED IN: 22 plant structures; EXPRESSED DURING: 13 growth stages; CONTAINS InterPro DOMAIN/s: Homeobox, conserved …
cassava4.1_002985m.g	105.002	166.413	105.532	328.327	297.3	317.356	309.718	283.304	421.168	44.2722	101.316	136.597	C9	G6	HB	RNA.regulation of transcription.HB,Homeobox transcription factor family	AT5G41410	loc_os10g39030	BEL1 (BELL 1); DNA binding / protein binding / transcription factor	POX (plant homeobox) family protein	BELL 1 (BEL1); CONTAINS InterPro DOMAIN/s: Homeobox (InterPro:IPR001356), Homeodomain-like (InterPro:IPR009057), POX (InterPro:IPR006563), Homeodomain-related (InterPro:IPR012287); BEST Arabidopsis thaliana protein match is: BEL1-like homeodomain 4 (TAIR:AT2G23760.3); Has 1807 Blast hits to 1807 proteins in 277 species: Archae - 0; Bacteria - 0; Metazoa - 736; Fungi - 347; Plants - 385; Viruses -…
cassava4.1_003045m.g	209.163	397.272	352.554	1108.01	1480.5	1252.15	1055.63	1308.48	1719.84	47.0731	126.953	146.149	C9	G6	HB	RNA.regulation of transcription.HB,Homeobox transcription factor family	AT2G35940	loc_os11g06020	BLH1 (BEL1-LIKE HOMEODOMAIN 1); DNA binding / protein heterodimerization/ protein homodimerization/ transcription factor	BEL1-like homeodomain 1	BEL1-like homeodomain 1 (BLH1); CONTAINS InterPro DOMAIN/s: Homeobox (InterPro:IPR001356), Homeodomain-like (InterPro:IPR009057), POX (InterPro:IPR006563), Homeodomain-related (InterPro:IPR012287); BEST Arabidopsis thaliana protein match is: BEL1-like homeodomain 6 (TAIR:AT4G34610.2); Has 71711 Blast hits to 13510 proteins in 414 species: Archae - 28; Bacteria - 75; Metazoa - 3080; Fungi - 2154; …
cassava4.1_008073m.g	99.716	150.698	148.526	160.028	192.672	190.288	203.074	204.603	220.305	66.7697	174.53	201.87	C9	G6	HB	RNA.regulation of transcription.HB,Homeobox transcription factor family	AT5G25220	loc_os08g19650	KNAT3 (KNOTTED1-LIKE HOMEOBOX GENE 3); transcription activator/ transcription factor	KNOTTED1-like homeobox gene 3	KNOTTED1-like homeobox gene 3 (KNAT3); FUNCTIONS IN: transcription activator activity, sequence-specific DNA binding transcription factor activity; INVOLVED IN: response to light stimulus, detection of cytokinin stimulus, cellular response to cytokine stimulus; LOCATED IN: cytosol, nucleus; EXPRESSED IN: 35 plant structures; EXPRESSED DURING: 13 growth stages; CONTAINS InterPro DOMAIN/s: ELK (Int…
cassava4.1_013986m.g	23.5474	31.3091	51.4816	62.2414	108.119	153.733	111.45	119.327	195.62	17.1668	49.6721	57.3132	C9	G6	HB	RNA.regulation of transcription.HB,Homeobox transcription factor family	AT4G37790	loc_os08g36220	HAT22; transcription factor	Homeobox-leucine zipper protein family	HAT22; FUNCTIONS IN: sequence-specific DNA binding transcription factor activity; INVOLVED IN: regulation of transcription, DNA-dependent, response to cytokinin stimulus; LOCATED IN: nucleus; EXPRESSED IN: 22 plant structures; EXPRESSED DURING: 13 growth stages; CONTAINS InterPro DOMAIN/s: Homeobox, conserved site (InterPro:IPR017970), Homeobox (InterPro:IPR001356), Homeodomain-like (InterPro:IPR…
cassava4.1_015016m.g	0.720839	1.82738	1.56343	5.94847	14.4013	14.0212	40.5548	24.4346	16.7113	38.5801	119.928	113.565	C1	G1	HSF	RNA.regulation of transcription.HSF,Heat-shock transcription factor family	AT2G41690	loc_os08g43334	AT-HSFB3; DNA binding / transcription factor	heat shock transcription factor B3	heat shock transcription factor B3 (HSFB3); FUNCTIONS IN: DNA binding, sequence-specific DNA binding transcription factor activity; INVOLVED IN: response to cadmium ion; LOCATED IN: nucleus; EXPRESSED IN: inflorescence meristem, leaf whorl, flower, cultured cell; EXPRESSED DURING: 4 anthesis, petal differentiation and expansion stage; CONTAINS InterPro DOMAIN/s: Winged helix-turn-helix transcript…
cassava4.1_013174m.g	4.32503	6.70038	11.279	5.65831	12.5466	11.6426	35.548	36.0141	121.894	156.398	176.995	201.127	C2	G1	HSF	RNA.regulation of transcription.HSF,Heat-shock transcription factor family	AT4G36990	loc_os08g43334	HSF4 (HEAT SHOCK FACTOR 4); DNA binding / transcription factor/ transcription repressor	heat shock factor 4	heat shock factor 4 (HSF4); FUNCTIONS IN: transcription repressor activity, DNA binding, sequence-specific DNA binding transcription factor activity; INVOLVED IN: response to cyclopentenone, response to heat; LOCATED IN: nucleus; CONTAINS InterPro DOMAIN/s: Winged helix-turn-helix transcription repressor DNA-binding (InterPro:IPR011991), Heat shock factor (HSF)-type, DNA-binding (InterPro:IPR0002…
cassava4.1_012115m.g	2.28266	0.852776	1.56343	1.16068	0.981909	1.2519	2.20297	2.64954	2.83982	39.4836	2.95814	12.0995	C4	G2	HSF	RNA.regulation of transcription.HSF,Heat-shock transcription factor family	AT3G22830	loc_os03g06630	AT-HSFA6B; DNA binding / transcription factor	heat shock transcription factor A6B	heat shock transcription factor A6B (HSFA6B); FUNCTIONS IN: DNA binding, sequence-specific DNA binding transcription factor activity; INVOLVED IN: regulation of transcription, DNA-dependent; LOCATED IN: nucleus; EXPRESSED IN: root; CONTAINS InterPro DOMAIN/s: Winged helix-turn-helix transcription repressor DNA-binding (InterPro:IPR011991), Heat shock factor (HSF)-type, DNA-binding (InterPro:IPR00…
cassava4.1_009665m.g	39.7663	44.1007	21.7764	82.6983	71.7885	30.2959	65.889	56.8179	15.4006	12.0167	19.8442	6.47427	C8	G5	HSF	RNA.regulation of transcription.HSF,Heat-shock transcription factor family	AT1G67970	loc_os03g63750	AT-HSFA8; DNA binding / transcription factor	heat shock transcription factor A8	heat shock transcription factor A8 (HSFA8); FUNCTIONS IN: DNA binding, sequence-specific DNA binding transcription factor activity; INVOLVED IN: regulation of transcription, DNA-dependent; LOCATED IN: nucleus; EXPRESSED IN: 24 plant structures; EXPRESSED DURING: 14 growth stages; CONTAINS InterPro DOMAIN/s: Winged helix-turn-helix transcription repressor DNA-binding (InterPro:IPR011991), Heat sho…
cassava4.1_010201m.g	67.1581	105.013	36.8523	210.228	253.333	150.728	238.923	186.449	50.0246	17.9799	43.0163	35.0247	C8	G5	HSF	RNA.regulation of transcription.HSF,Heat-shock transcription factor family	AT3G24520	loc_os02g13800	AT-HSFC1; DNA binding / transcription factor	heat shock transcription factor C1	heat shock transcription factor C1 (HSFC1); FUNCTIONS IN: DNA binding, sequence-specific DNA binding transcription factor activity; INVOLVED IN: regulation of transcription, DNA-dependent; LOCATED IN: nucleus; EXPRESSED IN: 14 plant structures; EXPRESSED DURING: LP.06 six leaves visible, LP.04 four leaves visible, 4 anthesis, petal differentiation and expansion stage, LP.08 eight leaves visible; …
cassava4.1_010803m.g	30.3954	38.984	11.6141	44.9763	22.8021	3.00455	33.345	7.94861	0.764568	16.1729	0.986046	2.33498	C8	G5	HSF	RNA.regulation of transcription.HSF,Heat-shock transcription factor family	AT3G22830	loc_os07g08140	AT-HSFA6B; DNA binding / transcription factor	heat shock transcription factor A6B	heat shock transcription factor A6B (HSFA6B); FUNCTIONS IN: DNA binding, sequence-specific DNA binding transcription factor activity; INVOLVED IN: regulation of transcription, DNA-dependent; LOCATED IN: nucleus; EXPRESSED IN: root; CONTAINS InterPro DOMAIN/s: Winged helix-turn-helix transcription repressor DNA-binding (InterPro:IPR011991), Heat shock factor (HSF)-type, DNA-binding (InterPro:IPR00…
cassava4.1_017897m.g	3.00349	4.50753	1.34008	8.99525	8.72808	2.87936	8.11095	8.73366	1.96603	8.22198	44.1256	28.6566	C1	G1	MADS	RNA.regulation of transcription.MADS box transcription factor family	AT4G37940	loc_os02g36924	AGL21; transcription factor	AGAMOUS-like 21	AGAMOUS-like 21 (AGL21); FUNCTIONS IN: sequence-specific DNA binding transcription factor activity; INVOLVED IN: regulation of transcription, DNA-dependent; LOCATED IN: nucleus; EXPRESSED IN: 9 plant structures; EXPRESSED DURING: L mature pollen stage, M germinated pollen stage, C globular stage, E expanded cotyledon stage; CONTAINS InterPro DOMAIN/s: Transcription factor, MADS-box (InterPro:IPR0…
cassava4.1_022444m.g	0.961118	0.730951	1.45176	1.01559	1.96382	1.50227	1.7023	1.96262	0.873792	6.95706	45.3581	25.5787	C1	G1	MADS	RNA.regulation of transcription.MADS box transcription factor family	AT3G57230	loc_os02g36924	AGL16 (AGAMOUS-LIKE 16); transcription factor	AGAMOUS-like 16	AGAMOUS-like 16 (AGL16); FUNCTIONS IN: sequence-specific DNA binding transcription factor activity; INVOLVED IN: regulation of transcription, DNA-dependent, stomatal lineage progression; LOCATED IN: nucleus; EXPRESSED IN: 26 plant structures; EXPRESSED DURING: 13 growth stages; CONTAINS InterPro DOMAIN/s: Transcription factor, MADS-box (InterPro:IPR002100), Transcription factor, K-box (InterPro:I…
cassava4.1_026695m.g	1.32154	1.34008	0.558369	2.03119	1.74562	0	1.90257	1.86449	1.96603	11.2939	62.8604	55.1905	C1	G1	MYB	RNA.regulation of transcription.MYB domain transcription factor family	AT1G48000	loc_os03g20090	MYB112 (myb domain protein 112); DNA binding / transcription factor	myb domain protein 112	myb domain protein 112 (MYB112); CONTAINS InterPro DOMAIN/s: SANT, DNA-binding (InterPro:IPR001005), Homeodomain-like (InterPro:IPR009057), Myb, DNA-binding (InterPro:IPR014778), HTH transcriptional regulator, Myb-type, DNA-binding (InterPro:IPR017930), Homeodomain-related (InterPro:IPR012287), Myb transcription factor (InterPro:IPR015495); BEST Arabidopsis thaliana protein match is: myb domain p…
cassava4.1_010483m.g	12.4945	11.6952	19.0962	10.4461	17.3471	28.7936	13.6184	22.9627	125.389	46.7117	86.4023	58.9053	C10	G6	MYB	RNA.regulation of transcription.MYB-related transcription factor family	AT3G16350	loc_os10g41200	myb family transcription factor	Homeodomain-like superfamily protein	Homeodomain-like superfamily protein; CONTAINS InterPro DOMAIN/s: SANT, DNA-binding (InterPro:IPR001005), Homeodomain-like (InterPro:IPR009057), Myb, DNA-binding (InterPro:IPR014778), Zinc finger, CCHC-type (InterPro:IPR001878), HTH transcriptional regulator, Myb-type, DNA-binding (InterPro:IPR017930), Myb-like DNA-binding domain, SHAQKYF class (InterPro:IPR006447); BEST Arabidopsis thaliana prot…
cassava4.1_010545m.g	13.2154	14.7408	22.4464	13.638	24.1113	45.9446	20.6279	39.5468	144.831	10.7518	33.7721	23.8805	C10	G6	MYB	RNA.regulation of transcription.MYB-related transcription factor family	AT3G16350	loc_os10g41200	myb family transcription factor	Homeodomain-like superfamily protein	Homeodomain-like superfamily protein; CONTAINS InterPro DOMAIN/s: SANT, DNA-binding (InterPro:IPR001005), Homeodomain-like (InterPro:IPR009057), Myb, DNA-binding (InterPro:IPR014778), Zinc finger, CCHC-type (InterPro:IPR001878), HTH transcriptional regulator, Myb-type, DNA-binding (InterPro:IPR017930), Myb-like DNA-binding domain, SHAQKYF class (InterPro:IPR006447); BEST Arabidopsis thaliana prot…
cassava4.1_013947m.g	0	0.24365	0	0.145085	0	0	0	0	0	4.96933	22.9256	68.882	C2	G1	MYB	RNA.regulation of transcription.MYB domain transcription factor family	AT3G24310	loc_os02g40530	MYB305 (myb domain protein 305); DNA binding / transcription factor	myb domain protein 305	myb domain protein 305 (MYB305); CONTAINS InterPro DOMAIN/s: SANT, DNA-binding (InterPro:IPR001005), Homeodomain-like (InterPro:IPR009057), Myb, DNA-binding (InterPro:IPR014778), HTH transcriptional regulator, Myb-type, DNA-binding (InterPro:IPR017930), Homeodomain-related (InterPro:IPR012287), Myb transcription factor (InterPro:IPR015495); BEST Arabidopsis thaliana protein match is: myb domain p…
cassava4.1_014512m.g	0.12014	0	0	0.145085	0.109101	0	0	0.098131	0	0.722811	10.6	37.0413	C2	G1	MYB	RNA.regulation of transcription.MYB domain transcription factor family	AT3G24310	loc_os02g40530	MYB305 (myb domain protein 305); DNA binding / transcription factor	myb domain protein 305	myb domain protein 305 (MYB305); CONTAINS InterPro DOMAIN/s: SANT, DNA-binding (InterPro:IPR001005), Homeodomain-like (InterPro:IPR009057), Myb, DNA-binding (InterPro:IPR014778), HTH transcriptional regulator, Myb-type, DNA-binding (InterPro:IPR017930), Homeodomain-related (InterPro:IPR012287), Myb transcription factor (InterPro:IPR015495); BEST Arabidopsis thaliana protein match is: myb domain p…
cassava4.1_014911m.g	6.60769	11.2079	16.6394	19.5864	25.6387	30.5463	33.1448	33.6589	26.8691	27.6475	54.3558	120.676	C2	G1	MYB	RNA.regulation of transcription.MYB domain transcription factor family	AT3G46130	loc_os11g47460	MYB111 (MYB DOMAIN PROTEIN 111); DNA binding / transcription factor	myb domain protein 48	myb domain protein 48 (MYB48); FUNCTIONS IN: DNA binding, sequence-specific DNA binding transcription factor activity; INVOLVED IN: regulation of transcription, DNA-dependent, response to salicylic acid stimulus, regulation of transcription; LOCATED IN: nucleus; EXPRESSED IN: 10 plant structures; EXPRESSED DURING: 7 growth stages; CONTAINS InterPro DOMAIN/s: SANT, DNA-binding (InterPro:IPR001005)…
cassava4.1_029459m.g	8.65006	11.0861	15.5227	2.75661	3.70943	16.6502	4.40595	5.88786	20.0972	13.6431	37.2232	45.0015	C2	G1	MYB	RNA.regulation of transcription.MYB domain transcription factor family	AT1G22640	loc_os11g07890	MYB3 (MYB DOMAIN PROTEIN 3); DNA binding / transcription factor	myb domain protein 3	myb domain protein 3 (MYB3); CONTAINS InterPro DOMAIN/s: SANT, DNA-binding (InterPro:IPR001005), Homeodomain-like (InterPro:IPR009057), Myb, DNA-binding (InterPro:IPR014778), HTH transcriptional regulator, Myb-type, DNA-binding (InterPro:IPR017930), Homeodomain-related (InterPro:IPR012287), Myb transcription factor (InterPro:IPR015495); BEST Arabidopsis thaliana protein match is: myb domain prote…
cassava4.1_011317m.g	10.0917	13.5226	19.9896	19.1512	16.9107	21.0318	20.1272	16.1916	26.8691	9.4869	16.2698	32.2652	C2	G6	MYB	RNA.regulation of transcription.MYB-related transcription factor family	AT5G52660	loc_os02g45670	myb family transcription factor	Homeodomain-like superfamily protein	Homeodomain-like superfamily protein; CONTAINS InterPro DOMAIN/s: SANT, DNA-binding (InterPro:IPR001005), Homeodomain-like (InterPro:IPR009057), Myb, DNA-binding (InterPro:IPR014778), HTH transcriptional regulator, Myb-type, DNA-binding (InterPro:IPR017930), Myb-like DNA-binding domain, SHAQKYF class (InterPro:IPR006447); BEST Arabidopsis thaliana protein match is: Homeodomain-like superfamily pr…
cassava4.1_023710m.g	0.961118	0.121825	1.22841	0.145085	0.109101	0	0	0.098131	0	22.3168	33.7721	7.42949	C3	G2	MYB	RNA.regulation of transcription.MYB domain transcription factor family	AT3G23250	loc_os10g33810	MYB15 (MYB DOMAIN PROTEIN 15); DNA binding / transcription factor	myb domain protein 15	myb domain protein 15 (MYB15); CONTAINS InterPro DOMAIN/s: SANT, DNA-binding (InterPro:IPR001005), Homeodomain-like (InterPro:IPR009057), Myb, DNA-binding (InterPro:IPR014778), HTH transcriptional regulator, Myb-type, DNA-binding (InterPro:IPR017930), Homeodomain-related (InterPro:IPR012287), Myb transcription factor (InterPro:IPR015495); BEST Arabidopsis thaliana protein match is: myb domain pro…
cassava4.1_034350m.g	57.3067	46.4154	44.8928	42.9451	18.9836	13.7709	22.3302	16.486	24.2477	245.846	218.163	87.7741	C3	G2	MYB	RNA.regulation of transcription.MYB domain transcription factor family	AT5G67300	loc_os09g01960	MYBR1 (MYB DOMAIN PROTEIN R1); DNA binding / transcription factor	myb domain protein r1	myb domain protein r1 (MYBR1); CONTAINS InterPro DOMAIN/s: SANT, DNA-binding (InterPro:IPR001005), Homeodomain-like (InterPro:IPR009057), Myb, DNA-binding (InterPro:IPR014778), HTH transcriptional regulator, Myb-type, DNA-binding (InterPro:IPR017930), Homeodomain-related (InterPro:IPR012287), Myb transcription factor (InterPro:IPR015495); BEST Arabidopsis thaliana protein match is: myb domain pro…
cassava4.1_034363m.g	1.68196	1.21825	2.5685	0	0.763707	0.250379	0.20027	0	0.436896	45.8082	24.6512	3.71475	C4	G2	MYB	RNA.regulation of transcription.MYB domain transcription factor family	AT3G50060	loc_os09g01960	MYB77; DNA binding / transcription factor	myb domain protein 77	myb domain protein 77 (MYB77); CONTAINS InterPro DOMAIN/s: SANT, DNA-binding (InterPro:IPR001005), Homeodomain-like (InterPro:IPR009057), Myb, DNA-binding (InterPro:IPR014778), HTH transcriptional regulator, Myb-type, DNA-binding (InterPro:IPR017930), Homeodomain-related (InterPro:IPR012287), Myb transcription factor (InterPro:IPR015495); BEST Arabidopsis thaliana protein match is: myb domain pro…
cassava4.1_024255m.g	83.2569	41.6642	23.4515	8.56	8.29168	10.8915	8.11095	9.12619	12.7792	60.5355	26.2535	22.1823	C5	G4	MYB	RNA.regulation of transcription.MYB domain transcription factor family	AT4G32730	loc_os12g13570	PC-MYB1; DNA binding / transcription coactivator/ transcription factor	Homeodomain-like protein	ARABIDOOSIS THALIANA MYB DOMAIN PROTEIN 3R1 (ATMYB3R1); CONTAINS InterPro DOMAIN/s: SANT, DNA-binding (InterPro:IPR001005), Myb, DNA-binding (InterPro:IPR014778), Homeodomain-like (InterPro:IPR009057), Homeodomain-related (InterPro:IPR012287), HTH transcriptional regulator, Myb-type, DNA-binding (InterPro:IPR017930), Myb transcription factor (InterPro:IPR015495); BEST Arabidopsis thaliana protein…
cassava4.1_008985m.g	101.758	74.4352	86.5472	56.2929	36.767	32.1737	52.1704	36.1122	14.4176	0.180703	0.369767	0.212271	C6	G4	MYB	RNA.regulation of transcription.MYB domain transcription factor family	AT5G49330	loc_os03g19120	AtMYB111 (myb domain protein 111); DNA binding / transcription factor	myb domain protein 111	myb domain protein 111 (MYB111); CONTAINS InterPro DOMAIN/s: SANT, DNA-binding (InterPro:IPR001005), Homeodomain-like (InterPro:IPR009057), Myb, DNA-binding (InterPro:IPR014778), HTH transcriptional regulator, Myb-type, DNA-binding (InterPro:IPR017930), Homeodomain-related (InterPro:IPR012287), Myb transcription factor (InterPro:IPR015495); BEST Arabidopsis thaliana protein match is: myb domain p…
cassava4.1_012592m.g	50.699	185.052	53.2684	7.54441	11.4556	5.50834	8.11095	27.0842	2.07525	2.16843	1.72558	5.30678	C6	G4	MYB	RNA.regulation of transcription.MYB domain transcription factor family	AT1G22640	loc_os03g29614	MYB3 (MYB DOMAIN PROTEIN 3); DNA binding / transcription factor	myb domain protein 3	myb domain protein 3 (MYB3); CONTAINS InterPro DOMAIN/s: SANT, DNA-binding (InterPro:IPR001005), Homeodomain-like (InterPro:IPR009057), Myb, DNA-binding (InterPro:IPR014778), HTH transcriptional regulator, Myb-type, DNA-binding (InterPro:IPR017930), Homeodomain-related (InterPro:IPR012287), Myb transcription factor (InterPro:IPR015495); BEST Arabidopsis thaliana protein match is: myb domain prote…
cassava4.1_033652m.g	34.36	21.1976	10.7207	8.85017	1.52741	1.87784	0.20027	0.098131	0.109224	0.0903514	0	0.106136	C6	G4	MYB	RNA.regulation of transcription.MYB domain transcription factor family	AT5G49330	loc_os03g19120	AtMYB111 (myb domain protein 111); DNA binding / transcription factor	myb domain protein 111	myb domain protein 111 (MYB111); CONTAINS InterPro DOMAIN/s: SANT, DNA-binding (InterPro:IPR001005), Homeodomain-like (InterPro:IPR009057), Myb, DNA-binding (InterPro:IPR014778), HTH transcriptional regulator, Myb-type, DNA-binding (InterPro:IPR017930), Homeodomain-related (InterPro:IPR012287), Myb transcription factor (InterPro:IPR015495); BEST Arabidopsis thaliana protein match is: myb domain p…
cassava4.1_020357m.g	27.6322	25.4615	26.69	56.5831	13.9649	8.26251	4.90662	1.2757	0.327672	0	0	0.106136	C6	G5	MYB	RNA.regulation of transcription.MYB-related transcription factor family	AT1G75250	loc_os01g44390	ATRL6 (ARABIDOPSIS RAD-LIKE 6); transcription factor	RAD-like 6	RAD-like 6 (RL6); CONTAINS InterPro DOMAIN/s: SANT, DNA-binding (InterPro:IPR001005), Molecular chaperone, heat shock protein, Hsp40, DnaJ (InterPro:IPR015609), Homeodomain-like (InterPro:IPR009057); BEST Arabidopsis thaliana protein match is: RAD-like 5 (TAIR:AT1G19510.1); Has 590 Blast hits to 589 proteins in 66 species: Archae - 0; Bacteria - 0; Metazoa - 121; Fungi - 0; Plants - 466; Viruses …
cassava4.1_004760m.g	203.517	129.135	738.163	297.569	159.287	667.761	156.411	74.874	550.379	28.0993	25.3907	110.275	C7	G3	MYB	RNA.regulation of transcription.MYB-related transcription factor family	AT1G01060	loc_os08g06110	LHY (LATE ELONGATED HYPOCOTYL); DNA binding / transcription factor	Homeodomain-like superfamily protein	LATE ELONGATED HYPOCOTYL (LHY); CONTAINS InterPro DOMAIN/s: SANT, DNA-binding (InterPro:IPR001005), Homeodomain-like (InterPro:IPR009057), Myb, DNA-binding (InterPro:IPR014778), HTH transcriptional regulator, Myb-type, DNA-binding (InterPro:IPR017930), Myb-like DNA-binding domain, SHAQKYF class (InterPro:IPR006447); BEST Arabidopsis thaliana protein match is: circadian clock associated 1 (TAIR:AT…
cassava4.1_011476m.g	8.89034	8.89324	43.6644	19.8766	7.96437	40.311	10.5142	7.35983	27.4152	4.69827	5.91628	14.116	C7	G3	MYB	RNA.regulation of transcription.MYB-related transcription factor family	AT3G09600	loc_os06g01670	myb family transcription factor	Homeodomain-like superfamily protein	Homeodomain-like superfamily protein; FUNCTIONS IN: DNA binding, sequence-specific DNA binding transcription factor activity; INVOLVED IN: in 9 processes; LOCATED IN: chloroplast; EXPRESSED IN: 22 plant structures; EXPRESSED DURING: 13 growth stages; CONTAINS InterPro DOMAIN/s: SANT, DNA-binding (InterPro:IPR001005), Homeodomain-like (InterPro:IPR009057), Myb, DNA-binding (InterPro:IPR014778), HT…
cassava4.1_027920m.g	35.5614	30.9436	345.519	73.7031	35.676	264.15	34.046	20.4113	279.613	20.7808	14.1744	60.0727	C7	G3	MYB	RNA.regulation of transcription.MYB-related transcription factor family	AT1G01060	loc_os08g06110	LHY (LATE ELONGATED HYPOCOTYL); DNA binding / transcription factor	Homeodomain-like superfamily protein	LATE ELONGATED HYPOCOTYL (LHY); CONTAINS InterPro DOMAIN/s: SANT, DNA-binding (InterPro:IPR001005), Homeodomain-like (InterPro:IPR009057), Myb, DNA-binding (InterPro:IPR014778), HTH transcriptional regulator, Myb-type, DNA-binding (InterPro:IPR017930), Myb-like DNA-binding domain, SHAQKYF class (InterPro:IPR006447); BEST Arabidopsis thaliana protein match is: circadian clock associated 1 (TAIR:AT…
cassava4.1_013293m.g	11.2931	35.5729	36.0706	1.74102	1.63652	7.76175	16.9228	19.2337	18.7865	8.76409	1.97209	1.91044	C7	G4	MYB	RNA.regulation of transcription.MYB domain transcription factor family	AT3G13540	loc_os11g07890	ATMYB5 (MYB DOMAIN PROTEIN 5); DNA binding / transcription factor	myb domain protein 5	myb domain protein 5 (MYB5); CONTAINS InterPro DOMAIN/s: SANT, DNA-binding (InterPro:IPR001005), Homeodomain-like (InterPro:IPR009057), Myb, DNA-binding (InterPro:IPR014778), HTH transcriptional regulator, Myb-type, DNA-binding (InterPro:IPR017930), Homeodomain-related (InterPro:IPR012287), Myb transcription factor (InterPro:IPR015495); BEST Arabidopsis thaliana protein match is: myb domain prote…
cassava4.1_012505m.g	29.0738	24.8523	31.9387	39.8983	43.204	30.6714	30.4411	18.743	9.17481	0.180703	0.123256	0.849085	C8	G5	MYB	RNA.regulation of transcription.MYB domain transcription factor family	AT1G74650	loc_os08g33940	MYB31 (MYB DOMAIN PROTEIN 31); DNA binding / transcription factor	myb domain protein 31	myb domain protein 31 (MYB31); CONTAINS InterPro DOMAIN/s: SANT, DNA-binding (InterPro:IPR001005), Homeodomain-like (InterPro:IPR009057), Myb, DNA-binding (InterPro:IPR014778), HTH transcriptional regulator, Myb-type, DNA-binding (InterPro:IPR017930), Homeodomain-related (InterPro:IPR012287), Myb transcription factor (InterPro:IPR015495); BEST Arabidopsis thaliana protein match is: myb domain pro…
cassava4.1_020375m.g	322.455	430.408	154.556	492.998	605.074	113.672	273.87	53.3833	3.71361	1.89738	1.47907	0.95522	C8	G5	MYB	RNA.regulation of transcription.MYB-related transcription factor family	AT4G39250	loc_os01g44390	ATRL1 (ARABIDOPSIS RAD-LIKE 1); DNA binding / transcription factor	RAD-like 1	RAD-like 1 (RL1); CONTAINS InterPro DOMAIN/s: Molecular chaperone, heat shock protein, Hsp40, DnaJ (InterPro:IPR015609), SANT, DNA-binding (InterPro:IPR001005), Myb, DNA-binding (InterPro:IPR014778), Homeodomain-like (InterPro:IPR009057), SANT, eukarya (InterPro:IPR017884); BEST Arabidopsis thaliana protein match is: Homeodomain-like superfamily protein (TAIR:AT2G21650.1); Has 592 Blast hits to 5…
cassava4.1_026887m.g	1.92224	2.68015	1.78678	30.3227	9.49179	1.12671	16.7226	3.92524	0.327672	0	0.123256	0.106136	C8	G5	MYB	RNA.regulation of transcription.MYB-related transcription factor family	AT1G75250	loc_os05g50340	ATRL6 (ARABIDOPSIS RAD-LIKE 6); transcription factor	RAD-like 6	RAD-like 6 (RL6); CONTAINS InterPro DOMAIN/s: SANT, DNA-binding (InterPro:IPR001005), Molecular chaperone, heat shock protein, Hsp40, DnaJ (InterPro:IPR015609), Homeodomain-like (InterPro:IPR009057); BEST Arabidopsis thaliana protein match is: RAD-like 5 (TAIR:AT1G19510.1); Has 590 Blast hits to 589 proteins in 66 species: Archae - 0; Bacteria - 0; Metazoa - 121; Fungi - 0; Plants - 466; Viruses …
cassava4.1_028739m.g	36.7628	143.875	0.670042	173.086	85.317	2.50379	23.8322	2.64954	0.109224	0.180703	0	0.212271	C8	G5	MYB	RNA.regulation of transcription.MYB-related transcription factor family	AT4G39250	loc_os01g44390	ATRL1 (ARABIDOPSIS RAD-LIKE 1); DNA binding / transcription factor	RAD-like 1	RAD-like 1 (RL1); CONTAINS InterPro DOMAIN/s: Molecular chaperone, heat shock protein, Hsp40, DnaJ (InterPro:IPR015609), SANT, DNA-binding (InterPro:IPR001005), Myb, DNA-binding (InterPro:IPR014778), Homeodomain-like (InterPro:IPR009057), SANT, eukarya (InterPro:IPR017884); BEST Arabidopsis thaliana protein match is: Homeodomain-like superfamily protein (TAIR:AT2G21650.1); Has 592 Blast hits to 5…
cassava4.1_030668m.g	1.92224	3.04563	0.111674	36.9966	39.2764	10.8915	24.0324	14.5234	0.655344	1.80703	2.58837	0.212271	C8	G5	MYB	RNA.regulation of transcription.MYB-related transcription factor family	AT1G75250	loc_os01g44390	ATRL6 (ARABIDOPSIS RAD-LIKE 6); transcription factor	RAD-like 6	RAD-like 6 (RL6); CONTAINS InterPro DOMAIN/s: SANT, DNA-binding (InterPro:IPR001005), Molecular chaperone, heat shock protein, Hsp40, DnaJ (InterPro:IPR015609), Homeodomain-like (InterPro:IPR009057); BEST Arabidopsis thaliana protein match is: RAD-like 5 (TAIR:AT1G19510.1); Has 590 Blast hits to 589 proteins in 66 species: Archae - 0; Bacteria - 0; Metazoa - 121; Fungi - 0; Plants - 466; Viruses …
cassava4.1_033077m.g	0	0.487301	0.446695	42.0746	6.43696	2.50379	15.521	3.72898	0.327672	0.0903514	0	0	C8	G5	MYB	RNA.regulation of transcription.MYB-related transcription factor family	AT1G75250	loc_os05g50340	ATRL6 (ARABIDOPSIS RAD-LIKE 6); transcription factor	RAD-like 6	RAD-like 6 (RL6); CONTAINS InterPro DOMAIN/s: SANT, DNA-binding (InterPro:IPR001005), Molecular chaperone, heat shock protein, Hsp40, DnaJ (InterPro:IPR015609), Homeodomain-like (InterPro:IPR009057); BEST Arabidopsis thaliana protein match is: RAD-like 5 (TAIR:AT1G19510.1); Has 590 Blast hits to 589 proteins in 66 species: Archae - 0; Bacteria - 0; Metazoa - 121; Fungi - 0; Plants - 466; Viruses …
cassava4.1_011766m.g	31.4766	45.6844	70.6895	60.5003	84.5533	264.025	58.9796	48.5749	114.248	0.451757	0.986046	0.530678	C9	G3	MYB	RNA.regulation of transcription.MYB domain transcription factor family	AT1G74650	loc_os08g33940	MYB31 (MYB DOMAIN PROTEIN 31); DNA binding / transcription factor	myb domain protein 31	myb domain protein 31 (MYB31); CONTAINS InterPro DOMAIN/s: SANT, DNA-binding (InterPro:IPR001005), Homeodomain-like (InterPro:IPR009057), Myb, DNA-binding (InterPro:IPR014778), HTH transcriptional regulator, Myb-type, DNA-binding (InterPro:IPR017930), Homeodomain-related (InterPro:IPR012287), Myb transcription factor (InterPro:IPR015495); BEST Arabidopsis thaliana protein match is: myb domain pro…
cassava4.1_011897m.g	3.72433	6.57856	11.279	10.5912	16.0378	34.6775	13.318	7.2617	7.42723	1.80703	0.616279	1.16749	C9	G3	MYB	RNA.regulation of transcription.MYB domain transcription factor family	AT1G56160	loc_os04g50770	MYB72 (MYB DOMAIN PROTEIN 72); DNA binding / transcription factor	myb domain protein 72	myb domain protein 72 (MYB72); CONTAINS InterPro DOMAIN/s: SANT, DNA-binding (InterPro:IPR001005), Homeodomain-like (InterPro:IPR009057), Myb, DNA-binding (InterPro:IPR014778), HTH transcriptional regulator, Myb-type, DNA-binding (InterPro:IPR017930), Homeodomain-related (InterPro:IPR012287), Myb transcription factor (InterPro:IPR015495); BEST Arabidopsis thaliana protein match is: myb domain pro…
cassava4.1_010350m.g	42.5295	41.5424	70.0194	92.2739	68.5154	112.671	75.7022	65.159	91.9666	17.4378	29.9512	60.285	C9	G3	MYB	RNA.regulation of transcription.MYB-related transcription factor family	AT5G52660	loc_os02g45670	myb family transcription factor	Homeodomain-like superfamily protein	Homeodomain-like superfamily protein; CONTAINS InterPro DOMAIN/s: SANT, DNA-binding (InterPro:IPR001005), Homeodomain-like (InterPro:IPR009057), Myb, DNA-binding (InterPro:IPR014778), HTH transcriptional regulator, Myb-type, DNA-binding (InterPro:IPR017930), Myb-like DNA-binding domain, SHAQKYF class (InterPro:IPR006447); BEST Arabidopsis thaliana protein match is: Homeodomain-like superfamily pr…
cassava4.1_014074m.g	11.2931	24.8523	10.944	3.7722	5.23685	49.3247	49.0662	47.2992	49.0416	5.69214	14.5442	7.53563	C9	G6	MYB	RNA.regulation of transcription.MYB domain transcription factor family	AT4G38620	loc_os03g29614	MYB4; DNA binding / transcription factor	myb domain protein 4	myb domain protein 4 (MYB4); CONTAINS InterPro DOMAIN/s: SANT, DNA-binding (InterPro:IPR001005), Homeodomain-like (InterPro:IPR009057), Myb, DNA-binding (InterPro:IPR014778), HTH transcriptional regulator, Myb-type, DNA-binding (InterPro:IPR017930), Homeodomain-related (InterPro:IPR012287), Myb transcription factor (InterPro:IPR015495); BEST Arabidopsis thaliana protein match is: myb domain prote…
cassava4.1_004881m.g	3.84447	2.9238	12.3958	3.91729	4.47314	10.6411	7.41001	8.63553	43.4711	1.53597	6.65581	4.66997	C10	G6	Psudo ARR	RNA.regulation of transcription.Psudo ARR transcription factor family	AT4G18020	loc_os01g13740	APRR2; transcription factor/ two-component response regulator	CheY-like two-component responsive regulator family protein	APRR2; CONTAINS InterPro DOMAIN/s: Myb-like DNA-binding domain, SHAQKYF class (InterPro:IPR006447), CheY-like (InterPro:IPR011006), Homeodomain-like (InterPro:IPR009057), Myb, DNA-binding (InterPro:IPR014778), Signal transduction response regulator, receiver domain (InterPro:IPR001789), Homeodomain-related (InterPro:IPR012287), HTH transcriptional regulator, Myb-type, DNA-binding (InterPro:IPR017…
cassava4.1_002434m.g	17.4203	15.2281	87.7756	32.2088	22.693	86.0052	27.7375	20.4113	56.1411	14.9983	23.2953	42.3481	C7	G3	Psudo ARR	RNA.regulation of transcription.Psudo ARR transcription factor family	AT5G24470	loc_os09g36220	APRR5 (ARABIDOPSIS PSEUDO-RESPONSE REGULATOR 5); transcription regulator/ two-component response regulator	pseudo-response regulator 5	pseudo-response regulator 5 (PRR5); CONTAINS InterPro DOMAIN/s: CheY-like (InterPro:IPR011006), Signal transduction response regulator, receiver domain (InterPro:IPR001789), CCT domain (InterPro:IPR010402); BEST Arabidopsis thaliana protein match is: pseudo-response regulator 9 (TAIR:AT2G46790.1); Has 30201 Blast hits to 17322 proteins in 780 species: Archae - 12; Bacteria - 1396; Metazoa - 17338…
cassava4.1_002929m.g	190.301	360.115	62.0906	704.822	669.335	207.064	439.894	479.37	77.7674	19.0642	38.5791	39.0579	C8	G5	Psudo ARR	RNA.regulation of transcription.Psudo ARR transcription factor family	AT5G24470	loc_os09g36220	APRR5 (ARABIDOPSIS PSEUDO-RESPONSE REGULATOR 5); transcription regulator/ two-component response regulator	pseudo-response regulator 5	pseudo-response regulator 5 (PRR5); CONTAINS InterPro DOMAIN/s: CheY-like (InterPro:IPR011006), Signal transduction response regulator, receiver domain (InterPro:IPR001789), CCT domain (InterPro:IPR010402); BEST Arabidopsis thaliana protein match is: pseudo-response regulator 9 (TAIR:AT2G46790.1); Has 30201 Blast hits to 17322 proteins in 780 species: Archae - 12; Bacteria - 1396; Metazoa - 17338…
cassava4.1_033332m.g	231.389	261.802	306.879	428.29	318.575	345.648	333.35	257.594	363.279	57.8249	86.7721	183.508	C9	G5	Psudo ARR	RNA.regulation of transcription.Psudo ARR transcription factor family	AT5G24470	loc_os09g36220	APRR5 (ARABIDOPSIS PSEUDO-RESPONSE REGULATOR 5); transcription regulator/ two-component response regulator	pseudo-response regulator 5	pseudo-response regulator 5 (PRR5); CONTAINS InterPro DOMAIN/s: CheY-like (InterPro:IPR011006), Signal transduction response regulator, receiver domain (InterPro:IPR001789), CCT domain (InterPro:IPR010402); BEST Arabidopsis thaliana protein match is: pseudo-response regulator 9 (TAIR:AT2G46790.1); Has 30201 Blast hits to 17322 proteins in 780 species: Archae - 12; Bacteria - 1396; Metazoa - 17338…
cassava4.1_032088m.g	47.8156	29.4817	18.2028	26.6956	23.2385	18.4029	14.9201	11.972	39.8667	33.7914	57.1907	57.7378	C1	G1	TCP	RNA.regulation of transcription.TCP transcription factor family	AT2G45680	loc_os08g43160	TCP family transcription factor, putative	TCP family transcription factor	TCP family transcription factor ; CONTAINS InterPro DOMAIN/s: Transcription factor, TCP (InterPro:IPR005333), Transcription factor TCP subgroup (InterPro:IPR017887); BEST Arabidopsis thaliana protein match is: TCP family transcription factor (TAIR:AT5G51910.2); Has 1218 Blast hits to 581 proteins in 105 species: Archae - 0; Bacteria - 18; Metazoa - 103; Fungi - 60; Plants - 391; Viruses - 0; Othe…
cassava4.1_004517m.g	371.112	312.969	182.14	226.913	173.361	99.0249	135.583	111.182	37.7915	136.882	44.1256	100.935	C6	G4	TCP	RNA.regulation of transcription.TCP transcription factor family	AT1G53230	loc_os01g11550	TCP3; transcription factor	TEOSINTE BRANCHED 1, cycloidea and PCF transcription factor 3	TEOSINTE BRANCHED 1, cycloidea and PCF transcription factor 3 (TCP3); CONTAINS InterPro DOMAIN/s: Transcription factor, TCP (InterPro:IPR005333), Transcription factor TCP subgroup (InterPro:IPR017887); BEST Arabidopsis thaliana protein match is: TCP family transcription factor 4 (TAIR:AT3G15030.3); Has 1510 Blast hits to 1508 proteins in 333 species: Archae - 0; Bacteria - 12; Metazoa - 43; Fungi…
cassava4.1_011082m.g	141.525	168.971	105.085	194.849	134.194	74.8634	164.923	99.9955	32.1118	6.86671	10.107	14.6467	C8	G5	TCP	RNA.regulation of transcription.TCP transcription factor family	AT3G15030	loc_os01g11550	TCP4 (TCP family transcription factor 4); transcription factor	TCP family transcription factor 4	TCP family transcription factor 4 (TCP4); CONTAINS InterPro DOMAIN/s: Transcription factor, TCP (InterPro:IPR005333), Transcription factor TCP subgroup (InterPro:IPR017887); BEST Arabidopsis thaliana protein match is: TEOSINTE BRANCHED 1, cycloidea and PCF transcription factor 3 (TAIR:AT1G53230.1); Has 1577 Blast hits to 1575 proteins in 330 species: Archae - 0; Bacteria - 0; Metazoa - 88; Fungi …
cassava4.1_021392m.g	0.360419	0.24365	0.335021	0.145085	0.327303	0.500758	4.40595	7.45796	34.9517	0.722811	2.46512	0.849085	C10	G6	Trihelix	RNA.regulation of transcription.Trihelix, Triple-Helix transcription factor family	AT2G38250	loc_os04g51320	DNA-binding protein-related	Homeodomain-like superfamily protein	Homeodomain-like superfamily protein; FUNCTIONS IN: sequence-specific DNA binding transcription factor activity; INVOLVED IN: regulation of transcription; LOCATED IN: nucleolus; EXPRESSED IN: stamen; EXPRESSED DURING: 4 anthesis, petal differentiation and expansion stage; CONTAINS InterPro DOMAIN/s: SANT, DNA-binding (InterPro:IPR001005), MYB-like (InterPro:IPR017877); BEST Arabidopsis thaliana p…
cassava4.1_002081m.g	12.9751	16.8119	19.6546	21.0373	13.2012	16.7754	22.0297	23.5515	46.5294	78.154	23.4186	25.1541	C4	G2	Trihelix	RNA.regulation of transcription.Trihelix, Triple-Helix transcription factor family	AT1G33240	loc_os10g37240	AT-GTL1 (GT2-LIKE 1); DNA binding / transcription factor	GT-2-like 1	GT-2-like 1 (GTL1); CONTAINS InterPro DOMAIN/s: SANT, DNA-binding (InterPro:IPR001005), MYB-like (InterPro:IPR017877); BEST Arabidopsis thaliana protein match is: Duplicated homeodomain-like superfamily protein (TAIR:AT1G76890.2); Has 6156 Blast hits to 4698 proteins in 415 species: Archae - 8; Bacteria - 243; Metazoa - 2333; Fungi - 696; Plants - 1321; Viruses - 126; Other Eukaryotes - 1429 (sou…
cassava4.1_004069m.g	130.111	86.2522	85.4304	36.7064	13.0921	4.63201	6.50879	3.14019	0.54612	2.80089	0.739535	0.212271	C6	G4	Trihelix	RNA.regulation of transcription.Trihelix, Triple-Helix transcription factor family	AT1G76890	loc_os02g01380	GT2; transcription factor	Duplicated homeodomain-like superfamily protein	GT2; CONTAINS InterPro DOMAIN/s: SANT, DNA-binding (InterPro:IPR001005), MYB-like (InterPro:IPR017877); BEST Arabidopsis thaliana protein match is: Duplicated homeodomain-like superfamily protein (TAIR:AT1G76880.1); Has 2646 Blast hits to 1586 proteins in 181 species: Archae - 0; Bacteria - 36; Metazoa - 813; Fungi - 181; Plants - 797; Viruses - 41; Other Eukaryotes - 778 (source: NCBI BLink).
cassava4.1_002430m.g	12.7348	20.5884	18.8729	19.1512	24.2204	18.7784	19.7266	20.8038	33.2041	22.6782	176.626	170.984	C1	G1	WRKY	RNA.regulation of transcription.WRKY domain transcription factor family	AT5G56270	loc_os08g38990	WRKY2; transcription factor	WRKY DNA-binding protein 2	WRKY DNA-binding protein 2 (WRKY2); CONTAINS InterPro DOMAIN/s: DNA-binding WRKY (InterPro:IPR003657); BEST Arabidopsis thaliana protein match is: WRKY DNA-binding protein 34 (TAIR:AT4G26440.1); Has 1807 Blast hits to 1807 proteins in 277 species: Archae - 0; Bacteria - 0; Metazoa - 736; Fungi - 347; Plants - 385; Viruses - 0; Other Eukaryotes - 339 (source: NCBI BLink).
cassava4.1_004929m.g	0	0	0	0	0	0.250379	10.5142	15.9954	128.884	4.69827	6.28604	9.76447	C10	G6	WRKY	RNA.regulation of transcription.WRKY domain transcription factor family	AT1G18860	loc_os06g05380	WRKY61; transcription factor	WRKY DNA-binding protein 61	WRKY DNA-binding protein 61 (WRKY61); CONTAINS InterPro DOMAIN/s: DNA-binding WRKY (InterPro:IPR003657); BEST Arabidopsis thaliana protein match is: WRKY DNA-binding protein 72 (TAIR:AT5G15130.1); Has 5252 Blast hits to 3559 proteins in 289 species: Archae - 0; Bacteria - 31; Metazoa - 146; Fungi - 97; Plants - 3463; Viruses - 1; Other Eukaryotes - 1514 (source: NCBI BLink).
cassava4.1_005267m.g	26.4308	34.7202	18.0911	53.3912	50.8411	22.7845	55.9756	66.1403	140.134	7.13776	37.8395	40.5438	C10	G6	WRKY	RNA.regulation of transcription.WRKY domain transcription factor family	AT2G03340	loc_os12g32250	WRKY3; transcription factor	WRKY DNA-binding protein 3	WRKY DNA-binding protein 3 (WRKY3); CONTAINS InterPro DOMAIN/s: DNA-binding WRKY (InterPro:IPR003657); BEST Arabidopsis thaliana protein match is: WRKY DNA-binding protein 4 (TAIR:AT1G13960.1); Has 6486 Blast hits to 3819 proteins in 292 species: Archae - 2; Bacteria - 20; Metazoa - 337; Fungi - 90; Plants - 5675; Viruses - 3; Other Eukaryotes - 359 (source: NCBI BLink).
cassava4.1_012748m.g	6.12713	5.48213	15.8577	13.0576	27.8208	22.2837	40.3545	41.5094	61.3839	7.95093	31.5535	38.9518	C10	G6	WRKY	RNA.regulation of transcription.WRKY domain transcription factor family	AT2G47260	loc_os07g02060	WRKY23; transcription factor	WRKY DNA-binding protein 23	WRKY DNA-binding protein 23 (WRKY23); CONTAINS InterPro DOMAIN/s: DNA-binding WRKY (InterPro:IPR003657), Transcription factor, WRKY group IIc (InterPro:IPR017396); BEST Arabidopsis thaliana protein match is: WRKY family transcription factor (TAIR:AT3G62340.1); Has 3541 Blast hits to 3088 proteins in 202 species: Archae - 0; Bacteria - 3; Metazoa - 11; Fungi - 7; Plants - 3503; Viruses - 0; Other …
cassava4.1_021176m.g	0.961118	2.19285	0.670042	4.20746	5.67325	5.25796	24.5331	22.6683	95.6802	12.9203	32.1698	29.0812	C10	G6	WRKY	RNA.regulation of transcription.WRKY domain transcription factor family	AT4G01720	loc_os01g18584	WRKY47; transcription factor	WRKY family transcription factor	WRKY47; CONTAINS InterPro DOMAIN/s: DNA-binding WRKY (InterPro:IPR003657); BEST Arabidopsis thaliana protein match is: WRKY family transcription factor (TAIR:AT4G04450.1); Has 3605 Blast hits to 3148 proteins in 215 species: Archae - 2; Bacteria - 4; Metazoa - 47; Fungi - 10; Plants - 3482; Viruses - 0; Other Eukaryotes - 60 (source: NCBI BLink).
cassava4.1_008041m.g	8.28965	10.5988	17.7561	12.6224	14.7286	18.2777	16.9228	15.2103	19.4419	9.21585	22.3093	30.4609	C2	G1	WRKY	RNA.regulation of transcription.WRKY domain transcription factor family	AT2G04880	loc_os07g39480	ZAP1 (ZINC-DEPENDENT ACTIVATOR PROTEIN-1); transcription activator/ transcription factor/ zinc ion binding	zinc-dependent activator protein-1	zinc-dependent activator protein-1 (ZAP1); CONTAINS InterPro DOMAIN/s: DNA-binding WRKY (InterPro:IPR003657); BEST Arabidopsis thaliana protein match is: WRKY family transcription factor family protein (TAIR:AT4G26640.2); Has 5944 Blast hits to 3097 proteins in 197 species: Archae - 0; Bacteria - 0; Metazoa - 9; Fungi - 0; Plants - 5898; Viruses - 0; Other Eukaryotes - 37 (source: NCBI BLink).
cassava4.1_012593m.g	2.76322	4.87301	4.02025	7.10915	10.3646	10.6411	34.6468	31.8926	26.7599	18.251	51.5209	70.0495	C2	G1	WRKY	RNA.regulation of transcription.WRKY domain transcription factor family	AT2G47260	loc_os07g02060	WRKY23; transcription factor	WRKY DNA-binding protein 23	WRKY DNA-binding protein 23 (WRKY23); CONTAINS InterPro DOMAIN/s: DNA-binding WRKY (InterPro:IPR003657), Transcription factor, WRKY group IIc (InterPro:IPR017396); BEST Arabidopsis thaliana protein match is: WRKY family transcription factor (TAIR:AT3G62340.1); Has 3541 Blast hits to 3088 proteins in 202 species: Archae - 0; Bacteria - 3; Metazoa - 11; Fungi - 7; Plants - 3503; Viruses - 0; Other …
cassava4.1_032017m.g	2.76322	1.9492	3.57356	4.49763	1.96382	5.13277	3.50473	4.21964	57.561	14.9983	31.6767	56.9948	C2	G6	WRKY	RNA.regulation of transcription.WRKY domain transcription factor family	AT2G30590	loc_os12g40570	WRKY21; calmodulin binding / transcription factor	WRKY DNA-binding protein 21	WRKY DNA-binding protein 21 (WRKY21); FUNCTIONS IN: calmodulin binding, sequence-specific DNA binding transcription factor activity; INVOLVED IN: regulation of transcription, DNA-dependent, regulation of transcription; LOCATED IN: nucleus; EXPRESSED IN: 22 plant structures; EXPRESSED DURING: 13 growth stages; CONTAINS InterPro DOMAIN/s: DNA-binding WRKY (InterPro:IPR003657), Transcription factor,…
cassava4.1_013417m.g	15.9786	24.4869	29.0352	17.2651	38.2945	11.1419	41.456	25.7103	16.1651	34.6949	43.8791	34.2818	C3	G1	WRKY	RNA.regulation of transcription.WRKY domain transcription factor family	AT3G56400	loc_os05g25770	WRKY70; transcription factor/ transcription repressor	WRKY DNA-binding protein 70	WRKY DNA-binding protein 70 (WRKY70); CONTAINS InterPro DOMAIN/s: DNA-binding WRKY (InterPro:IPR003657); BEST Arabidopsis thaliana protein match is: WRKY DNA-binding protein 54 (TAIR:AT2G40750.1); Has 3203 Blast hits to 2772 proteins in 182 species: Archae - 0; Bacteria - 0; Metazoa - 0; Fungi - 0; Plants - 3190; Viruses - 0; Other Eukaryotes - 13 (source: NCBI BLink).
cassava4.1_010768m.g	20.664	24.9742	8.37553	23.7939	44.1859	17.7769	36.4492	49.2618	23.4831	99.2962	140.019	36.0861	C3	G2	WRKY	RNA.regulation of transcription.WRKY domain transcription factor family	AT4G11070	loc_os08g29660	WRKY41; transcription factor	WRKY family transcription factor	WRKY41; FUNCTIONS IN: sequence-specific DNA binding transcription factor activity; INVOLVED IN: regulation of transcription, DNA-dependent, regulation of transcription; CONTAINS InterPro DOMAIN/s: DNA-binding WRKY (InterPro:IPR003657); BEST Arabidopsis thaliana protein match is: WRKY family transcription factor (TAIR:AT4G23810.1); Has 1807 Blast hits to 1807 proteins in 277 species: Archae - 0; B…
cassava4.1_011518m.g	3.36391	6.82221	3.68523	5.51322	15.9287	7.63656	10.2138	13.0514	24.4662	108.241	181.926	58.3746	C3	G2	WRKY	RNA.regulation of transcription.WRKY domain transcription factor family	AT4G11070	loc_os08g29660	WRKY41; transcription factor	WRKY family transcription factor	WRKY41; FUNCTIONS IN: sequence-specific DNA binding transcription factor activity; INVOLVED IN: regulation of transcription, DNA-dependent, regulation of transcription; CONTAINS InterPro DOMAIN/s: DNA-binding WRKY (InterPro:IPR003657); BEST Arabidopsis thaliana protein match is: WRKY family transcription factor (TAIR:AT4G23810.1); Has 1807 Blast hits to 1807 proteins in 277 species: Archae - 0; B…
cassava4.1_026182m.g	0.12014	0.24365	0.111674	0	0	0.12519	0	0.196262	0.109224	43.8204	8.87442	11.8872	C4	G2	WRKY	RNA.regulation of transcription.WRKY domain transcription factor family	AT5G15130	loc_os06g05380	WRKY72; transcription factor	WRKY DNA-binding protein 72	WRKY DNA-binding protein 72 (WRKY72); CONTAINS InterPro DOMAIN/s: DNA-binding WRKY (InterPro:IPR003657); BEST Arabidopsis thaliana protein match is: WRKY DNA-binding protein 61 (TAIR:AT1G18860.1); Has 6758 Blast hits to 4151 proteins in 378 species: Archae - 0; Bacteria - 669; Metazoa - 395; Fungi - 387; Plants - 3478; Viruses - 9; Other Eukaryotes - 1820 (source: NCBI BLink).
cassava4.1_011680m.g	107.165	265.822	206.931	232.716	293.154	95.6448	178.841	162.505	73.18	42.4652	69.7628	83.6349	C8	G5	WRKY	RNA.regulation of transcription.WRKY domain transcription factor family	AT3G56400	loc_os05g25770	WRKY70; transcription factor/ transcription repressor	WRKY DNA-binding protein 70	WRKY DNA-binding protein 70 (WRKY70); CONTAINS InterPro DOMAIN/s: DNA-binding WRKY (InterPro:IPR003657); BEST Arabidopsis thaliana protein match is: WRKY DNA-binding protein 54 (TAIR:AT2G40750.1); Has 3203 Blast hits to 2772 proteins in 182 species: Archae - 0; Bacteria - 0; Metazoa - 0; Fungi - 0; Plants - 3190; Viruses - 0; Other Eukaryotes - 13 (source: NCBI BLink).

## Sheet: Table S5
Table S5. Information of genes presented in the regulatory networks of drought.
geneid	FL00	FL03	FL24	FEL00	FEL03	FEL24	BL00	BL03	BL24	RT00	RT03	RT24	groupinfo	geneid	At.homolog	rice.homolog	mapman.description	TAIR10.short_description	TAIR10.ANN
034379m.g	0.12014	0.852776	1.11674	1.30576	7.96437	1.62746	0.500676	4.31777	2.40293	5.78249	25.7605	42.8788	C2	034379m.g	AT3G14440	loc_os03g44380	NCED3 (NINE-CIS-EPOXYCAROTENOID DIOXYGENASE 3); 9-cis-epoxycarotenoid dioxygenase	nine-cis-epoxycarotenoid dioxygenase 3	nine-cis-epoxycarotenoid dioxygenase 3 (NCED3); CONTAINS InterPro DOMAIN/s: Carotenoid oxygenase (InterPro:IPR004294); BEST Arabidopsis thaliana protein match is: nine-cis-epoxycarotenoid dioxygenase 9 (TAIR:AT1G78390.1); Has 2945 Blast hits to 2901 proteins in 493 species: Archae - 16; Bacteria - 796; Metazoa - 281; Fungi - 204; Plants - 893; Viruses - 0; Other Eukaryotes - 755 (source: NCBI BLi…
008041m.g	8.28965	10.5988	17.7561	12.6224	14.7286	18.2777	16.9228	15.2103	19.4419	9.21585	22.3093	30.4609	C2	008041m.g	AT2G04880	loc_os07g39480	WRKY1 (ZINC-DEPENDENT ACTIVATOR PROTEIN-1); transcription activator/ transcription factor/ zinc ion binding	zinc-dependent activator protein-1	zinc-dependent activator protein-1 (ZAP1); CONTAINS InterPro DOMAIN/s: DNA-binding WRKY (InterPro:IPR003657); BEST Arabidopsis thaliana protein match is: WRKY family transcription factor family protein (TAIR:AT4G26640.2); Has 5944 Blast hits to 3097 proteins in 197 species: Archae - 0; Bacteria - 0; Metazoa - 9; Fungi - 0; Plants - 5898; Viruses - 0; Other Eukaryotes - 37 (source: NCBI BLink).
012593m.g	2.76322	4.87301	4.02025	7.10915	10.3646	10.6411	34.6468	31.8926	26.7599	18.251	51.5209	70.0495	C2	012593m.g	AT2G47260	loc_os07g02060	WRKY23; transcription factor	WRKY DNA-binding protein 23	WRKY DNA-binding protein 23 (WRKY23); CONTAINS InterPro DOMAIN/s: DNA-binding WRKY (InterPro:IPR003657), Transcription factor, WRKY group IIc (InterPro:IPR017396); BEST Arabidopsis thaliana protein match is: WRKY family transcription factor (TAIR:AT3G62340.1); Has 3541 Blast hits to 3088 proteins in 202 species: Archae - 0; Bacteria - 3; Metazoa - 11; Fungi - 7; Plants - 3503; Viruses - 0; Other …
032017m.g	2.76322	1.9492	3.57356	4.49763	1.96382	5.13277	3.50473	4.21964	57.561	14.9983	31.6767	56.9948	C2	032017m.g	AT2G30590	loc_os12g40570	WRKY21; calmodulin binding / transcription factor	WRKY DNA-binding protein 21	WRKY DNA-binding protein 21 (WRKY21); FUNCTIONS IN: calmodulin binding, sequence-specific DNA binding transcription factor activity; INVOLVED IN: regulation of transcription, DNA-dependent, regulation of transcription; LOCATED IN: nucleus; EXPRESSED IN: 22 plant structures; EXPRESSED DURING: 13 growth stages; CONTAINS InterPro DOMAIN/s: DNA-binding WRKY (InterPro:IPR003657), Transcription factor,…
010216m.g	16.8196	22.1722	30.4869	14.2183	33.8213	31.1722	20.728	33.2664	25.34	9.21585	43.2628	48.3978	C2	010216m.g	AT1G45249	loc_os02g52780	ABF2 (ABSCISIC ACID RESPONSIVE ELEMENTS-BINDING FACTOR 2); DNA binding / protein binding / transcription activator/ transcription factor	abscisic acid responsive elements-binding factor 2	abscisic acid responsive elements-binding factor 2 (ABF2); FUNCTIONS IN: protein binding, DNA binding, transcription activator activity, sequence-specific DNA binding transcription factor activity; INVOLVED IN: in 6 processes; LOCATED IN: nucleus; EXPRESSED IN: hydathode, leaf vascular system, whole plant, root, cultured cell; CONTAINS InterPro DOMAIN/s: Basic-leucine zipper (bZIP) transcription …
005920m.g	0.961118	0.487301	24.6799	0.435254	0.327303	13.5205	1.20162	4.1215	43.4711	0.0903514	0.493023	0.106136	C10	005920m.g	AT5G52300		RD29B LTI65 (LOW-TEMPERATURE-INDUCED 65)	CAP160 protein	LOW-TEMPERATURE-INDUCED 65 (LTI65); FUNCTIONS IN: molecular_function unknown; INVOLVED IN: response to water deprivation, response to salt stress, response to cold, abscisic acid mediated signaling pathway, response to abscisic acid stimulus; LOCATED IN: cellular_component unknown; EXPRESSED IN: leaf, seed; EXPRESSED DURING: dry seed stage, LP.04 four leaves visible; CONTAINS InterPro DOMAIN/s: C…
010999m.g	5.04587	7.30951	18.0911	5.80339	13.5285	16.7754	8.71176	18.0561	75.1461	10.2097	91.8255	157.611	C2	010999m.g	AT4G27410	loc_os01g66120	RD26 (RESPONSIVE TO DESICCATION 26); transcription activator/ transcription factor	NAC (No Apical Meristem) domain transcriptional regulator superfamily protein	RESPONSIVE TO DESICCATION 26 (RD26); CONTAINS InterPro DOMAIN/s: No apical meristem (NAM) protein (InterPro:IPR003441); BEST Arabidopsis thaliana protein match is: NAC domain containing protein 19 (TAIR:AT1G52890.1); Has 297 Blast hits to 297 proteins in 44 species: Archae - 0; Bacteria - 0; Metazoa - 0; Fungi - 0; Plants - 297; Viruses - 0; Other Eukaryotes - 0 (source: NCBI BLink).
023969m.g	0.24028	0.609126	2.34515	2.32136	2.40022	2.87936	2.90392	3.82711	12.0146	11.7457	71.1186	111.124	C2	023969m.g	AT1G61110	loc_os07g37920	nac025 (Arabidopsis NAC domain containing protein 25); transcription factor	NAC domain containing protein 25	NAC domain containing protein 25 (NAC025); FUNCTIONS IN: sequence-specific DNA binding transcription factor activity; INVOLVED IN: multicellular organismal development, regulation of transcription; LOCATED IN: cellular_component unknown; EXPRESSED IN: 6 plant structures; EXPRESSED DURING: 4 anthesis, petal differentiation and expansion stage; CONTAINS InterPro DOMAIN/s: No apical meristem (NAM) p…
010869m.g	0.600699	1.9492	1.45176	3.91729	7.52797	3.6305	13.2178	18.6449	74.7092	13.5527	155.919	151.455	C2	010869m.g	AT5G61430	loc_os04g38720	NAC100 (ARABIDOPSIS NAC DOMAIN CONTAINING PROTEIN 100); transcription factor	NAC domain containing protein 100	NAC domain containing protein 100 (NAC100); FUNCTIONS IN: sequence-specific DNA binding transcription factor activity; INVOLVED IN: multicellular organismal development, regulation of transcription; LOCATED IN: cellular_component unknown; EXPRESSED IN: 9 plant structures; EXPRESSED DURING: LP.04 four leaves visible, 4 anthesis, petal differentiation and expansion stage; CONTAINS InterPro DOMAIN/s…
027866m.g	40.8475	50.192	135.907	51.7953	23.5658	104.909	50.368	26.7898	49.1508	0.361406	0.246512	0.530678	C7	027866m.g	AT5G25610	loc_os04g14990	RD22; nutrient reservoir	BURP domain-containing protein	RESPONSIVE TO DESSICATION 22 (RD22); FUNCTIONS IN: nutrient reservoir activity; INVOLVED IN: response to desiccation, response to salt stress, response to abscisic acid stimulus; LOCATED IN: endomembrane system; EXPRESSED IN: 21 plant structures; EXPRESSED DURING: 13 growth stages; CONTAINS InterPro DOMAIN/s: BURP (InterPro:IPR004873); BEST Arabidopsis thaliana protein match is: unknown seed prot…
023981m.g	39.4059	67.9784	148.749	41.6393	44.7314	48.4484	20.728	21.9814	19.3326	1.08422	0.86279	1.06136	C7	023981m.g	AT5G25610	loc_os04g14990	RD22; nutrient reservoir	BURP domain-containing protein	RESPONSIVE TO DESSICATION 22 (RD22); FUNCTIONS IN: nutrient reservoir activity; INVOLVED IN: response to desiccation, response to salt stress, response to abscisic acid stimulus; LOCATED IN: endomembrane system; EXPRESSED IN: 21 plant structures; EXPRESSED DURING: 13 growth stages; CONTAINS InterPro DOMAIN/s: BURP (InterPro:IPR004873); BEST Arabidopsis thaliana protein match is: unknown seed prot…
032804m.g	14.2966	27.7761	53.8267	22.9234	23.4567	22.9097	8.91203	12.3645	9.50248	0.271054	0.123256	0.106136	C7	032804m.g	AT5G25610	loc_os01g53240	RD22; nutrient reservoir	BURP domain-containing protein	RESPONSIVE TO DESSICATION 22 (RD22); FUNCTIONS IN: nutrient reservoir activity; INVOLVED IN: response to desiccation, response to salt stress, response to abscisic acid stimulus; LOCATED IN: endomembrane system; EXPRESSED IN: 21 plant structures; EXPRESSED DURING: 13 growth stages; CONTAINS InterPro DOMAIN/s: BURP (InterPro:IPR004873); BEST Arabidopsis thaliana protein match is: unknown seed prot…
029110m.g	9.01048	11.5734	4.35528	34.8203	33.1667	14.522	25.1339	30.2244	7.86412	4.42722	7.02558	11.5688	C8	029110m.g	AT2G40340	loc_os01g07120	DREB2C; AP2 domain-containing transcription factor, putative (DRE2B)	Integrase-type DNA-binding superfamily protein	DREB2C; CONTAINS InterPro DOMAIN/s: DNA-binding, integrase-type (InterPro:IPR016177), Pathogenesis-related transcriptional factor/ERF, DNA-binding (InterPro:IPR001471); BEST Arabidopsis thaliana protein match is: Integrase-type DNA-binding superfamily protein (TAIR:AT2G40350.1); Has 5601 Blast hits to 5564 proteins in 248 species: Archae - 0; Bacteria - 0; Metazoa - 0; Fungi - 0; Plants - 5583; V…
010164m.g	1367.67	2198.58	881.776	6106.76	3846.36	1943.82	3831.37	3061.2	1734.04	492.144	291.87	636.177	C8	010164m.g	AT4G39090	loc_os02g27030	RD19 (RESPONSIVE TO DEHYDRATION 19); cysteine-type endopeptidase/ cysteine-type peptidase	Papain family cysteine protease	RESPONSIVE TO DEHYDRATION 19 (RD19); CONTAINS InterPro DOMAIN/s: Peptidase C1A, papain (InterPro:IPR013128), Proteinase inhibitor I29, cathepsin propeptide (InterPro:IPR013201), Peptidase C1A, papain C-terminal (InterPro:IPR000668), Peptidase, cysteine peptidase active site (InterPro:IPR000169); BEST Arabidopsis thaliana protein match is: Papain family cysteine protease (TAIR:AT2G21430.1); Has 30…
002371m.g	19.1022	14.7408	18.5378	9.43051	7.85527	23.5356	7.71041	6.9673	95.1341	19.0642	18.7349	22.1823	C10	002371m.g	AT2G39800	loc_os05g38150	P5CS1 (DELTA1-PYRROLINE-5-CARBOXYLATE SYNTHASE 1); delta1-pyrroline-5-carboxylate synthetase	delta1-pyrroline-5-carboxylate synthase 1	delta1-pyrroline-5-carboxylate synthase 1 (P5CS1); FUNCTIONS IN: delta1-pyrroline-5-carboxylate synthetase activity; INVOLVED IN: in 9 processes; LOCATED IN: chloroplast, membrane, cytoplasm; EXPRESSED IN: 6 plant structures; EXPRESSED DURING: C globular stage, D bilateral stage, E expanded cotyledon stage; CONTAINS InterPro DOMAIN/s: Glutamate 5-kinase (InterPro:IPR001057), Aspartate/glutamate/u…
001092m.g	26.9113	44.8317	35.2889	46.8624	54.9869	52.3292	92.4248	121.29	553.438	38.3994	75.5558	61.4525	C10	001092m.g	AT5G51070	loc_os02g32520	ERD1 (EARLY RESPONSIVE TO DEHYDRATION 1); ATP binding / ATPase/ nucleoside-triphosphatase/ nucleotide binding / protein binding	Clp ATPase	EARLY RESPONSIVE TO DEHYDRATION 1 (ERD1); FUNCTIONS IN: nucleoside-triphosphatase activity, ATPase activity, nucleotide binding, ATP binding; INVOLVED IN: response to water deprivation; LOCATED IN: chloroplast stroma, chloroplast, chloroplast envelope; EXPRESSED IN: 22 plant structures; EXPRESSED DURING: 13 growth stages; CONTAINS InterPro DOMAIN/s: Clp ATPase, C-terminal (InterPro:IPR019489), AT…
010991m.g	0.480559	3.04563	3.35021	1.01559	11.2374	7.13581	3.90527	11.6776	80.8257	3.61406	12.6953	77.5851	C10	010991m.g	AT4G27410	loc_os01g66120	ANAC19 (AT1G52890)	NAC (No Apical Meristem) domain transcriptional regulator superfamily protein	RESPONSIVE TO DESICCATION 26 (RD26); CONTAINS InterPro DOMAIN/s: No apical meristem (NAM) protein (InterPro:IPR003441); BEST Arabidopsis thaliana protein match is: NAC domain containing protein 19 (TAIR:AT1G52890.1); Has 297 Blast hits to 297 proteins in 44 species: Archae - 0; Bacteria - 0; Metazoa - 0; Fungi - 0; Plants - 297; Viruses - 0; Other Eukaryotes - 0 (source: NCBI BLink).
020925m.g	0.24028	0.121825	0.223347	1.01559	0.654606	0.375569	0.700946	2.15888	94.6972	18.7027	3.32791	5.09451	C10	020925m.g	AT1G56010	loc_os06g46270	NAC1; transcription factor	NAC domain containing protein 1	NAC domain containing protein 1 (NAC1); CONTAINS InterPro DOMAIN/s: No apical meristem (NAM) protein (InterPro:IPR003441); BEST Arabidopsis thaliana protein match is: NAC (No Apical Meristem) domain transcriptional regulator superfamily protein (TAIR:AT3G12977.1); Has 2736 Blast hits to 2731 proteins in 75 species: Archae - 0; Bacteria - 0; Metazoa - 0; Fungi - 0; Plants - 2736; Viruses - 0; Othe…
029889m.g	0.480559	0.609126	0.335021	3.19186	17.6744	11.0167	9.81325	23.4533	167.222	1.71668	0.369767	9.5522	C10	029889m.g	AT1G56010	loc_os06g46270	NAC1; transcription factor	NAC domain containing protein 1	NAC domain containing protein 1 (NAC1); CONTAINS InterPro DOMAIN/s: No apical meristem (NAM) protein (InterPro:IPR003441); BEST Arabidopsis thaliana protein match is: NAC (No Apical Meristem) domain transcriptional regulator superfamily protein (TAIR:AT3G12977.1); Has 2736 Blast hits to 2731 proteins in 75 species: Archae - 0; Bacteria - 0; Metazoa - 0; Fungi - 0; Plants - 2736; Viruses - 0; Othe…
010010m.g	0.720839	0.609126	0.89339	2.03119	8.18258	9.6396	19.7266	26.8879	153.787	3.88511	34.2651	29.718	C10	010010m.g	AT3G04070	loc_os07g37920	anac047 (Arabidopsis NAC domain containing protein 47); transcription factor	NAC domain containing protein 47	NAC domain containing protein 47 (NAC047); FUNCTIONS IN: sequence-specific DNA binding transcription factor activity; INVOLVED IN: multicellular organismal development, regulation of transcription; LOCATED IN: cellular_component unknown; EXPRESSED IN: 16 plant structures; EXPRESSED DURING: 7 growth stages; CONTAINS InterPro DOMAIN/s: No apical meristem (NAM) protein (InterPro:IPR003441); BEST Ara…
010191m.g	0.360419	0.852776	2.90352	1.45085	6.00056	7.88694	13.8187	16.6823	241.822	1.44562	10.4767	17.8308	C10	010191m.g	AT3G04070	loc_os07g37920	anac047 (Arabidopsis NAC domain containing protein 47); transcription factor	NAC domain containing protein 47	NAC domain containing protein 47 (NAC047); FUNCTIONS IN: sequence-specific DNA binding transcription factor activity; INVOLVED IN: multicellular organismal development, regulation of transcription; LOCATED IN: cellular_component unknown; EXPRESSED IN: 16 plant structures; EXPRESSED DURING: 7 growth stages; CONTAINS InterPro DOMAIN/s: No apical meristem (NAM) protein (InterPro:IPR003441); BEST Ara…
030482m.g	0.600699	0.365475	2.01013	1.16068	0.872808	1.50227	3.00406	6.28039	75.6922	5.69214	1.97209	5.73132	C10	030482m.g	AT4G28530	loc_os04g43560	anac074 (Arabidopsis NAC domain containing protein 74); transcription factor	NAC domain containing protein 74	NAC domain containing protein 74 (NAC074); FUNCTIONS IN: sequence-specific DNA binding transcription factor activity; INVOLVED IN: multicellular organismal development, regulation of transcription; LOCATED IN: cellular_component unknown; EXPRESSED IN: 18 plant structures; EXPRESSED DURING: 13 growth stages; CONTAINS InterPro DOMAIN/s: No apical meristem (NAM) protein (InterPro:IPR003441); BEST Ar…
014491m.g	51.7802	34.3547	52.375	65.7234	46.8043	56.8361	28.8389	38.958	143.193	29.9063	47.207	70.1556	C10	014491m.g	AT5G13180	loc_os07g37920	ANAC083 (ARABIDOPSIS NAC DOMAIN CONTAINING PROTEIN 83); transcription factor	NAC domain containing protein 83	NAC domain containing protein 83 (NAC083); CONTAINS InterPro DOMAIN/s: No apical meristem (NAM) protein (InterPro:IPR003441); BEST Arabidopsis thaliana protein match is: NAC domain containing protein 41 (TAIR:AT2G33480.1); Has 1807 Blast hits to 1807 proteins in 277 species: Archae - 0; Bacteria - 0; Metazoa - 736; Fungi - 347; Plants - 385; Viruses - 0; Other Eukaryotes - 339 (source: NCBI BLink…
025545m.g	0.840979	3.77658	7.37047	9.72068	8.83718	10.5159	12.5169	17.5655	49.6969	5.33073	16.5163	17.4062	C10	025545m.g	AT5G61430	loc_os04g38720	ANAC100 (ARABIDOPSIS NAC DOMAIN CONTAINING PROTEIN 100); transcription factor	NAC domain containing protein 100	NAC domain containing protein 100 (NAC100); FUNCTIONS IN: sequence-specific DNA binding transcription factor activity; INVOLVED IN: multicellular organismal development, regulation of transcription; LOCATED IN: cellular_component unknown; EXPRESSED IN: 9 plant structures; EXPRESSED DURING: LP.04 four leaves visible, 4 anthesis, petal differentiation and expansion stage; CONTAINS InterPro DOMAIN/s…
012777m.g	11.8938	14.619	36.964	62.2414	72.1158	81.248	87.2178	82.7245	245.645	37.9476	44.8651	65.3795	C10	012777m.g	AT3G01470	loc_os09g29460	ATHB-1 (ARABIDOPSIS THALIANA HOMEOBOX 1); DNA binding / protein homodimerization/ sequence-specific DNA binding / transcription activator/ transcription factor	homeobox 1	homeobox 1 (HB-1); FUNCTIONS IN: sequence-specific DNA binding, DNA binding, transcription activator activity, protein homodimerization activity, sequence-specific DNA binding transcription factor activity; INVOLVED IN: response to salt stress, response to blue light, positive regulation of transcription, regulation of transcription, DNA-dependent, leaf morphogenesis; LOCATED IN: nucleus; EXPRESS…
015049m.g	8.52993	15.1063	34.6189	23.2136	59.5691	70.8573	46.0622	82.8226	306.155	4.06581	54.4791	123.117	C10	015049m.g	AT2G46680	loc_os09g35910	ATHB-7 (ARABIDOPSIS THALIANA HOMEOBOX 7); transcription activator/ transcription factor	homeobox 7	homeobox 7 (HB-7); FUNCTIONS IN: transcription activator activity, sequence-specific DNA binding transcription factor activity; INVOLVED IN: response to water deprivation, abscisic acid mediated signaling pathway, regulation of transcription, DNA-dependent, response to abscisic acid stimulus; LOCATED IN: nucleus; EXPRESSED IN: 21 plant structures; EXPRESSED DURING: 6 growth stages; CONTAINS Inter…
015051m.g	1.32154	2.07103	6.14206	5.65831	7.20067	8.01213	4.80649	15.3084	76.3475	6.1439	9.61395	15.8142	C10	015051m.g	AT3G61890	loc_os09g35910	ATHB-12 (ARABIDOPSIS THALIANA HOMEOBOX 12); transcription activator/ transcription factor	homeobox 12	homeobox 12 (HB-12); CONTAINS InterPro DOMAIN/s: Homeobox, conserved site (InterPro:IPR017970), Homeobox (InterPro:IPR001356), Homeodomain-like (InterPro:IPR009057), Helix-turn-helix motif, lambda-like repressor (InterPro:IPR000047), Leucine zipper, homeobox-associated (InterPro:IPR003106), Homeodomain-related (InterPro:IPR012287); BEST Arabidopsis thaliana protein match is: homeobox 7 (TAIR:AT2G…
